# Supplementary material for: CcpA Ensures Optimal Metabolic Fitness of Streptococcus pneumoniae
Source: PLoS One. 2011 Oct 21;6(10):e26707. doi: 10.1371/journal.pone.0026707 (PMC3198803; doi:10.1371/journal.pone.0026707)
Supplement: Table S1 — Overview of all significantly up- or downregulated genes as determined by the DNA microarray analysis of D39Δ ccpA compared to D39 wild-type (yellow columns). Only genes were included that have a ratio of (D39ΔccpA/D39 wt) >1.5 or <0.66, and >2.0 or <0.5 in at least one of the four conditions tested (See also Materials and Methods). In case genes were also significantly up- or downregulated (according to the same criteria) in the in silico comparison of Glc compared to Gal, which was done for both the M and TS phases and for both D39 wt and the D39ΔccpA, these data were also given (green columns, ratios are Glc/Gal). In addition, putative cre sites are given in columns AG to AJ. For more details, see column headers. Glc = glucose, Gal = galactose, wt = D39 wild-type, ccpA = D39ΔccpA, M = mid-exponential growth phase, TS = transition-to-stationary growth phase, bayes p. = bayesian p-value, FDR = false discovery rate, COG = cluster of orthologous groups. (XLS) [file pone.0026707.s002.xls]

## Sheet: Table S1
Table S1. Overview of all significantly up- or downregulated genes as determined by the DNA microarray analysis of D39∆ccpA compared to D39 wild-type.
Locus tag in spot description DNA microarrays	TIGR4 locus tag	R6 locus tag	D39 locus tag	Ratio Glc_M ccpA/wt	Bayes.p	FDR	Ratio Gal_M ccpA/wt	Bayes.p	FDR	Ratio Glc_TS ccpA/wt	Bayes.p	FDR	Ratio Gal_TS ccpA/wt	Bayes.p	FDR	Grouping of genes based on the following numbering: 1=Glc_M, 10=Gal_M, 100=Glc_TS, 1000=Gal_TS	Ratio wt_M Glc/Gal	Bayes.p	FDR	Ratio ccpA_M Glc/Gal	Bayes.p	FDR	Ratio wt_TS Glc/Gal	Bayes.p	FDR	Ratio ccpA_TS Glc/Gal	Bayes.p	FDR	D39 annotation/R6 annotation/TIGR4 annotation	COG	Locus tag in spot description DNA microarrays	Sequence cre site	Position to start space between middle CcpA box and start codon	Position to promoter where T of TATAAT is 1; always shortest distance is taken to the middle of CcpA box	Remark
SP0004	SP0004	spr0004	SPD_0004	0.461812	9.48841e-12	1.6831e-10	1.84219	3.44454e-10	4.53029e-09	0.413132	9.30323e-12	1.8839e-10				111	1.97	1.89176e-07	8.34051e-06	0.45	5.1e-08	5.73e-06	2.87	9.18e-07	2e-05				translation-associated GTPase	[J] Translation, ribosomal structure and biogenesis	SP0004
SP0005	SP0005	spr0005	SPD_0005	0.499382	1.39565e-10	1.89316e-09				0.512643	2.99828e-09	2.33625e-08				101													peptidyl-tRNA hydrolase	[J] Translation, ribosomal structure and biogenesis	SP0005
SP0007	SP0007	spr0007	SPD_0007	0.536719	4.51051e-10	5.2709e-09				0.480098	3.88906e-10	4.36955e-09				101							10.01	0.000545392	0.00328083				S4 domain-containing protein	[J] Translation, ribosomal structure and biogenesis	SP0007
SP0008	SP0008	spr0008	SPD_0008	0.504395	1.11097e-11	1.93107e-10				0.420313	1.14887e-11	2.22306e-10				101	1.57	4.08975e-05	0.000537533				2.94	0.000156554	0.00121713				hypothetical protein SPD_0008	[D] Cell cycle control, cell division, chromosome partitioning	SP0008
SP0010	SP0010	spr0009	SPD_0010	0.546916	4.77148e-10	5.51992e-09				0.418449	6.25222e-12	1.40493e-10				101	1.71	2.03147e-06	5.66049e-05				4.08	4.43e-08	2.49e-06				hypothetical protein SPD_0010	[V] Defense mechanisms	SP0010
SP0012	SP0012	spr0011	SPD_0012	0.589954	3.56872e-09	3.15709e-08				0.451728	1.17942e-10	1.62368e-09	1.55414	0.00718275	0.0610183	1101				0.66	9.24e-05	0.00126156	4.07	1.69e-08	1.47e-06				hypoxanthine-guanine phosphoribosyltransferase	[F] Nucleotide transport and metabolism	SP0012
SP0018	SP0018	spr0020	SPD_0023	0.481775	1.79055e-10	2.32839e-09										1	2.78	1.54784e-05	0.00024959										hypothetical protein SPD_0023		SP0018
SP0027	SP0027	spr0028	SPD_0033				2.20322	8.45846e-12	1.68148e-10	0.488778	1.91815e-08	1.13428e-07				110													ribose-phosphate pyrophosphokinase	[E] Amino acid transport and metabolism	SP0027
SP0047	SP0047	spr0048	SPD_0054	1.55984	2.97024e-08	1.95324e-07				2.48924	3.10023e-08	1.68457e-07				101							0.32	0.000347443	0.00231828				phosphoribosylaminoimidazole synthetase	[F] Nucleotide transport and metabolism	SP0047
SP0054	SP0054	spr0054	SPD_0060	2.17566	5.33793e-10	6.07365e-09	1.82932	9.51662e-07	4.58468e-06	1.53943	1.347e-05	3.89667e-05				111													phosphoribosylaminoimidazole carboxylase ATPase subunit	[F] Nucleotide transport and metabolism	SP0054
SP0057	SP0057	spr0057	SPD_0063							0.368589	1.26676e-12	3.80357e-11				100	2.12	0.000100092	0.00106287				4.26	1.15e-05	0.000146169				beta-N-acetylhexosaminidase	[G] Carbohydrate transport and metabolism	SP0057	ATATAATCGCTATCAA	-36	27
SP0060	SP0060	spr0059	SPD_0065	15.2223	0	0	22.0233	0	0	8.77857	3.44169e-15	2.85415e-13	19.2448	8.57334e-05	0.0023148	1111				0.62	3.29e-05	0.000603467				0.46	0.000922094	0.0197034	Beta-galactosidase 3	[G] Carbohydrate transport and metabolism	SP0060	ATGAAAGCGCAAACTT	-29	27
SP0061	SP0061	spr0060	SPD_0066	12.96	1.77636e-14	6.67872e-13	19.3213	0	0	8.55323	1.84519e-13	7.47302e-12	5.1247	0.000286355	0.00524934	1111													PTS system, IIB component	[G] Carbohydrate transport and metabolism	SP0061
SP0062	SP0062	spr0061	SPD_0067	14.0122	2.22045e-16	1.63415e-14	21.2418	0	0	10.1362	7.22755e-14	3.31231e-12	8.48456	8.99744e-05	0.0023741	1111													PTS system, IIC component	[G] Carbohydrate transport and metabolism	SP0062
SP0063	SP0063	spr0062	SPD_0068	12.1148	1.57652e-14	6.05908e-13	22.4439	0	0	11.9936	4.97491e-13	1.75026e-11	8.67921	8.4433e-08	2.26215e-05	1111													PTS system, IID component	[G] Carbohydrate transport and metabolism	SP0063
SP0064	SP0064	spr0063	SPD_0069	7.59486	5.31797e-14	1.75189e-12	10.5858	0	0	7.21856	6.36935e-13	2.1128e-11	5.44652	4.24275e-06	0.000268682	1111													PTS system, IIA component	[G] Carbohydrate transport and metabolism	SP0064
SP0065	SP0065	spr0064	SPD_0070	4.85566	4.36318e-14	1.47963e-12	7.09364	3.33067e-16	2.8802e-14	3.1966	5.95272e-11	9.2148e-10	8.37703	0.00631298	0.0559494	1111													sugar isomerase domain-containing protein	[M] Cell wall/membrane/envelope biogenesis	SP0065
SP0066	SP0066	spr0065	SPD_0071	15.3651	1.11022e-16	1.06674e-14	11.9164	3.70074e-06	1.5221e-05	13.3448	2.22045e-16	3.86691e-14	14.2936	9.01837e-05	0.00236173	1111							0.35	0.000923603	0.00497204				aldose 1-epimerase	[G] Carbohydrate transport and metabolism	SP0066
SP0075	SP0075	spr0068	SPD_0074	0.558377	8.33863e-10	9.01354e-09	1.57567	1.96222e-08	1.55316e-07	0.551793	3.51055e-06	1.11157e-05	2.61109	0.00693565	0.0596466	1111	2.34	1.44145e-06	4.40401e-05										phosphorylase, Pnp/Udp family protein, putative	[F] Nucleotide transport and metabolism	SP0075
SP0082	SP0082	spr0075	SPD_0080										0.190185	0.000282635	0.00523626	1000													cell wall surface anchor family protein		SP0082
SP0090	SP0090	spr0081	SPD_0088				2.16427	4.76648e-10	6.08386e-09				1.85857	0.0685654	0.295561	1010													ABC transporter, permease protein	[G] Carbohydrate transport and metabolism	SP0090	ATGTAATCGTTATCAA	-60	53
SP0091	SP0091	spr0082	SPD_0089	1.73631	3.42264e-09	3.05126e-08	2.34551	2.16689e-10	3.08447e-09	1.93033	1.66363e-09	1.41328e-08	3.49865	0.0329053	0.177139	1111							0.29	0.000799948	0.00445083				ABC transporter, permease protein	[G] Carbohydrate transport and metabolism	SP0091	TTTGTATTCGTTATCATTA	downstream of start
SP0095	SP0095	spr0084	SPD_0091										0.385261	0.00152274	0.0200139	1000													hypothetical protein SPD_0091	[R] General function prediction only	SP0095
SP0096	SP0096	spr0085	SPD_0092	13.2399	0	0	14.4356	0	0	2.64761	4.31255e-12	1.08062e-10	40.1206	9.24989e-05	0.00233459	1111							3.57	6.98e-05	0.000627882				hypothetical protein SPD_0092		SP0096	TGTAAACGATTTCA	-20	15
SP0097	SP0097	spr0086	SPD_0093				2.49165	2.88358e-12	6.6055e-11				1.92194	0.000229875	0.00447292	1010	2.24	1.97086e-07	8.58063e-06				1.95	0.000346646	0.00232186				hypothetical protein SPD_0093		SP0097	ACAAAAACGCTTACAT	-54	-11
SP0098	SP0098	spr0087	SPD_0094				3.08691	1.00697e-13	3.48312e-12				1.56932	0.000457499	0.0078496	1010	2.7	3.84683e-09	5.15328e-07										hypothetical protein SPD_0094		SP0098
SP0099	SP0099	spr0088	SPD_0095				3.35196	8.58202e-14	3.06033e-12				1.60255	0.00270911	0.029487	1010	2.83	5.82268e-08	3.43735e-06							0.53	0.002684	0.0358176	hypothetical protein SPD_0095	[S] Function unknown	SP0099
SP0100	SP0100	spr0089	SPD_0096				2.79251	7.69496e-13	1.94284e-11				2.42598	0.00222652	0.0258499	1010	3.06	3.58898e-08	2.40392e-06				2.43	0.000220833	0.00160242				hypothetical protein SPD_0096	[K] Transcription	SP0100
SP0101	SP0101	spr0090	SPD_0097	0.518972	3.73552e-10	4.48651e-09	2.26362	2.55303e-10	3.53237e-09	0.554151	6.16514e-10	6.40991e-09				111	2.96	5.68888e-09	6.60479e-07	0.59	1.92e-05	0.00043396	2.06	9.18e-05	0.000777637	0.51	0.00257602	0.035048	transporter, putative	[P] Inorganic ion transport and metabolism	SP0101	TATGAAAAAGCAATCACTC	downstream of start
SP0102	SP0102	spr0091	SPD_0098							0.409519	7.51532e-12	1.58642e-10				100	1.71	6.68533e-06	0.000133822				3.49	2.03e-07	7.3e-06				glycosyl transferase, group 2 family protein	[M] Cell wall/membrane/envelope biogenesis	SP0102	ATTGTTACCGATCACATTC	downstream of start
SP0104	SP0104	spr0093	SPD_0101										0.393762	0.00116268	0.0165967	1000							0.43	3.22e-05	0.000327005				hydrolase, haloacid dehalogenase-like family protein	[R] General function prediction only	SP0104
SP0109	SP0109	spr0098	SPD_0106	2.17611	1.74719e-11	2.89164e-10	2.27945	7.20027e-10	8.55867e-09							11													bacteriocin, putative		SP0109
SP0110	SP0110	spr0099	SPD_0107	3.07916	8.09131e-13	1.87838e-11	3.9644	9.67448e-13	2.37334e-11	1.75148	2.54414e-07	1.0689e-06	4.40694	3.918e-05	0.00125196	1111													membrnae protein, putative	[S] Function unknown	SP0110
SP0111	SP0111	spr0100	SPD_0108	5.41938	7.77156e-15	3.23877e-13	3.52416	7.43938e-07	3.69194e-06	3.71913	1.55953e-12	4.6426e-11	5.42904	0.00061601	0.00997936	1111													amino acid ABC transporter, ATP-binding protein, putative	[V] Defense mechanisms	SP0111
SP0115	SP0115	spr0109	SPD_0116	0.0439312	1.22125e-15	6.92506e-14	0.0381385	2.82219e-13	8.06772e-12	0.0837385	1.11022e-16	2.97454e-14	0.0133233	0.000207056	0.00412101	1111													hypothetical protein SPD_0116		SP0115
SP0117	SP0117	spr0121	SPD_0126	2.77869	5.75251e-12	1.08141e-10										1													pneumococcal surface protein A	[R] General function prediction only	SP0117
SP0118	SP0118	spr0122	SPD_0127				2.41776	3.07598e-12	6.95414e-11	0.391876	6.64691e-09	4.65819e-08	1.72643	0.00230754	0.0265253	1110	1.9	2.13559e-06	5.85691e-05				2.18	0.000166273	0.0012841	0.51	0.00265821	0.0356098	tRNA (5-methylaminomethyl-2-thiouridylate)-methyltransferase	[J] Translation, ribosomal structure and biogenesis	SP0118
SP0138	SP0138	no_R6	SPD_0141							0.475713	3.21391e-10	3.75639e-09				100	2.37	0.000274697	0.00231663										hypothetical protein SPD_0141		SP0138
SP0139	SP0139	spr0138	SPD_0142	0.628732	5.92804e-05	0.000155342				0.437165	7.27318e-12	1.56373e-10				101	4.06	4.95087e-07	1.87434e-05	2.69	4.1e-05	0.000717653							hypothetical protein SPD_0142		SP0139
SP0141	SP0141	spr0140	SPD_0144	0.54805	4.60701e-08	2.84058e-07				0.366093	5.32974e-12	1.22937e-10				101													transcriptional regulator		SP0141
SP0142	SP0142	spr0141	SPD_0145							0.398278	3.18001e-12	8.58603e-11				100													hypothetical protein SPD_0145		SP0142
SP0149	SP0149	spr0147	SPD_0151										3.19488	9.87862e-05	0.00244023	1000													lipoprotein	[P] Inorganic ion transport and metabolism	SP0149
SP0154	SP0154	spr0152	SPD_0156	3.52559	2.33147e-15	1.2219e-13	3.04111	2.7025e-09	2.79879e-08	3.90422	6.82787e-14	3.17086e-12	15.8195	0.0145838	0.101186	1111													hypothetical protein SPD_0156	[S] Function unknown	SP0154	TGAAAACGCTTGAAA	-47	-12	same box as SP0154: divergent gene pair
SP0155	SP0155	no_R6	SPD_0157	3.33069	1.68754e-14	6.4145e-13	2.96749	2.1076e-09	2.24314e-08	4.68707	1.66534e-15	1.65725e-13	2.11803	0.0162954	0.108938	1111										2.99	0.00137577	0.0240795	sensor histidine kinase, putative	[T] Signal transduction mechanisms	SP0155
SP0156	SP0156	spr0154	SPD_0158	3.79046	1.55431e-14	6.04086e-13	2.81926	3.68577e-07	1.99204e-06	4.54424	5.40679e-14	2.61553e-12	2.90901	0.00114323	0.0163863	1111										2.68	5.49e-05	0.00415919	DNA-binding response regulator	[T] Signal transduction mechanisms	SP0156
SP0157	SP0157	spr0155	SPD_0159	2.18198	5.7154e-09	4.65166e-08	2.33608	1.41525e-09	1.55407e-08	2.03991	4.13024e-08	2.15354e-07				111										3.71	4.42e-05	0.0037568	hypothetical protein SPD_0159		SP0157	CATGAAAAAGAAACCAATT	downstream of start
SP0208	SP0208	spr0187	SPD_0192							0.365107	9.66475e-11	1.37397e-09	3.34148	0.00170325	0.0216512	1100							8.41	1.84e-07	6.82e-06				30S ribosomal protein S10	[J] Translation, ribosomal structure and biogenesis	SP0208
SP0209	SP0209	spr0188	SPD_0193							0.451174	1.76428e-08	1.05766e-07	3.0999	2.76072e-07	4.0065e-05	1100							2.93	2.24e-07	7.86e-06	0.51	0.00427803	0.0508545	50S ribosomal protein L3	[J] Translation, ribosomal structure and biogenesis	SP0209
SP0210	SP0210	spr0189	SPD_0194							0.509143	4.97517e-09	3.6558e-08	2.8281	1.48041e-06	0.000122768	1100							3.16	3.6e-06	5.86e-05				50S ribosomal protein L4	[J] Translation, ribosomal structure and biogenesis	SP0210
SP0212	SP0212	spr0191	SPD_0196										2.10165	6.44216e-07	8.31039e-05	1000													50S ribosomal protein L2	[J] Translation, ribosomal structure and biogenesis	SP0212
SP0214	SP0214	spr0194	SPD_0198							0.578864	1.81936e-09	1.51237e-08	2.56186	0.00132118	0.0180457	1100							2.6	6.1e-06	9.15e-05				50S ribosomal protein L22	[J] Translation, ribosomal structure and biogenesis	SP0214
SP0215	SP0215	spr0195	SPD_0199							0.595381	3.25865e-07	1.33059e-06	2.56368	1.26905e-07	2.60005e-05	1100							3	3.94e-07	1.06e-05				30S ribosomal protein S3	[J] Translation, ribosomal structure and biogenesis	SP0215
SP0216	SP0216	spr0196	SPD_0200							0.645104	7.15513e-08	3.53494e-07	2.08188	0.000645162	0.0103553	1100							3.84	3.95e-07	1.05e-05				50S ribosomal protein L16	[J] Translation, ribosomal structure and biogenesis	SP0216
SP0232	SP0232	spr0211	SPD_0215							0.343503	4.52294e-11	7.3614e-10	2.02849	0.0472905	0.226565	1100							3.4	8.19e-06	0.000114086				translation initiation factor IF-1	[J] Translation, ribosomal structure and biogenesis	SP0232
SP0233	SP0233	spr0212	no_SPD							0.484232	7.70192e-10	7.55656e-09	1.65432	0.0692012	0.296832	1100													50S ribosomal protein L36	[J] Translation, ribosomal structure and biogenesis	SP0233
SP0234	SP0234	spr0213	SPD_0216							0.303944	1.14072e-10	1.57664e-09				100							5.4	1e-08	1e-06				30S ribosomal protein S13	[J] Translation, ribosomal structure and biogenesis	SP0234
SP0235	SP0235	spr0214	SPD_0217							0.47484	1.44589e-07	6.44817e-07				100							3.18	1.32e-05	0.000161583				30S ribosomal protein S11	[J] Translation, ribosomal structure and biogenesis	SP0235
SP0246	SP0246	spr0227	SPD_0230	0.654499	1.52961e-06	6.08851e-06				0.49772	1.45051e-10	1.89218e-09				101													transcriptional regulator, DeoR family protein	[G] Carbohydrate transport and metabolism	SP0246
SP0259	SP0259	spr0238	SPD_0241	0.437159	1.72307e-12	3.6342e-11				0.569053	1.35408e-08	8.42187e-08				101													Holliday junction DNA helicase B	[L] Replication, recombination and repair	SP0259
SP0266	SP0266	spr0245	SPD_0248	0.49467	2.26895e-09	2.15022e-08				0.371664	4.74509e-13	1.70383e-11				101				0.38	4.23e-07	2.5e-05	26.56	5.34e-07	1.32e-05				D-fructose-6-phosphate amidotransferase	[M] Cell wall/membrane/envelope biogenesis	SP0266
SP0268	SP0268	spr0247	SPD_0250	15.0789	1.11022e-16	1.0106e-14	11.8518	3.20002e-09	3.18071e-08	8.17721	1.33227e-15	1.49687e-13	47.9434	0.000114035	0.00272045	1111													pullulanase, extracellular	[G] Carbohydrate transport and metabolism	SP0268	AAGAAAACGCTTGCAT	-61	-25
SP0281	SP0281	spr0258	SPD_0261							0.30735	1.01788e-10	1.42954e-09	0.517089	0.000799075	0.0124806	1100							3.15	0.000203045	0.00150469				aminopeptidase C	[E] Amino acid transport and metabolism	SP0281
SP0282	SP0282	spr0259	SPD_0262	6.67202	1.39888e-14	5.49856e-13	3.82201	1.81855e-13	5.7185e-12	8.07477	4.61631e-13	1.67485e-11	3.09797	6.93536e-07	7.79221e-05	1111	0.43	3.42677e-06	8.52531e-05							1.9	0.000190128	0.00761167	PTS system, mannose/fructose/sorbose family protein, IID component	[G] Carbohydrate transport and metabolism	SP0282
SP0283	SP0283	spr0260	SPD_0263	5.28762	3.9968e-15	1.92013e-13	2.91556	2.10404e-06	9.20087e-06	5.24559	3.37147e-11	5.78465e-10	3.1963	1.08458e-06	9.94105e-05	1111	0.5	1.11341e-06	3.59074e-05				0.37	1.28e-06	2.52e-05				PTS system, mannose-specific IIC component	[G] Carbohydrate transport and metabolism	SP0283
SP0284	SP0284	spr0261	SPD_0264	4.88516	1.20126e-13	3.52132e-12	3.51643	8.40772e-13	2.09225e-11	2.47613	2.32056e-08	1.33375e-07	3.83498	1.11897e-08	7.79475e-06	1111													PTS system, mannose-specific IIAB components	[G] Carbohydrate transport and metabolism	SP0284	ATGAAAACGGTTTATA	-68	-2
SP0285	SP0285	spr0262	SPD_0265	4.66708	2.09843e-12	4.3464e-11	1.96004	2.3326e-10	3.26658e-09	3.55111	7.13666e-10	7.14281e-09				111							0.46	0.000311328	0.00212203	2.29	0.00191054	0.029186	alcohol dehydrogenase	[R] General function prediction only	SP0285	TGGAAAAGGCTTTCTT	-114	-6
SP0287	SP0287	spr0264	SPD_0267	1.56964	1.38143e-05	4.26641e-05				2.09392	9.45181e-08	4.50351e-07	4.25033	0.00983002	0.0762538	1101													xanthine/uracil permease family protein	[R] General function prediction only	SP0287
SP0303	SP0303	spr0276	SPD_0277	0.403913	1.25191e-11	2.14374e-10				0.494457	2.50586e-08	1.41917e-07				101	0.2	8.0334e-06	0.000151245										6-phospho-beta-glucosidase	[G] Carbohydrate transport and metabolism	SP0303	AAGAATGCGTTTTTAT	-59	-25	boxes different in D39 and TIGR4
SP0311	SP0311	spr0283	SPD_0284							0.465735	1.74666e-09	1.46594e-08				100													hypothetical protein SPD_0284		SP0311
SP0313	SP0313	spr0285	SPD_0286							0.432278	7.09476e-09	4.91273e-08				100							3.89	7.93e-05	0.000683622				glutathione peroxidase	[O] Posttranslational modification, protein turnover, chaperones	SP0313	TTGTAAACGGTTTCTA	-102	-73
SP0317	SP0317	spr0287	SPD_0289	2.00706	6.95651e-09	5.50631e-08										1	0.45	0.000229061	0.00200962										keto-hydroxyglutarate-aldolase/keto-deoxy-phosphogluconate aldolase	[G] Carbohydrate transport and metabolism	SP0317
SP0324	SP0324	spr0294	SPD_0296	2.23232	3.36349e-08	2.17464e-07	1.57163	0.000663205	0.00163976	1.80482	1.19289e-08	7.55427e-08	18.5717	0.0175247	0.115603	1111													PTS system, IIC component	[G] Carbohydrate transport and metabolism	SP0324
SP0325	SP0325	spr0295	SPD_0297	2.95177	5.78506e-09	4.6973e-08	2.42192	5.87519e-09	5.41927e-08	2.24717	1.04144e-08	6.74228e-08	1.86712	0.0479071	0.228889	1111													PTS system, IID component	[G] Carbohydrate transport and metabolism	SP0325	TGGCAACGATTTCT	downstream of start
SP0334	SP0334	spr0302	SPD_0304							0.458484	1.32353e-10	1.76623e-09				100							2.57	8.23e-05	0.000704649				S-adenosyl-methyltransferase MraW	[M] Cell wall/membrane/envelope biogenesis	SP0334
SP0338	SP0338	spr0307	SPD_0308	0.473666	1.06807e-08	7.92801e-08										1001	2.51	0.0002125	0.0018881				2.53	3.53e-06	5.77e-05				ATP-dependent Clp protease, ATP-binding subunit	[O] Posttranslational modification, protein turnover, chaperones	SP0338
SP0340	SP0340	spr0308	SPD_0309							0.485606	3.69261e-09	2.80204e-08	0.571063	0.0666105	0.289282	1100							4.33	7.75e-07	1.75e-05				S-ribosylhomocysteinase	[T] Signal transduction mechanisms	SP0340
SP0342	SP0342	spr0310	SPD_0311	0.535854	1.52135e-08	1.08502e-07	2.05837	4.73222e-12	1.00422e-10	0.657962	2.82943e-06	9.20158e-06	2.63913	0.000865688	0.0132245	1111							3.39	2.72e-05	0.000284521				glucan 1,6-alpha-glucosidase	[G] Carbohydrate transport and metabolism	SP0342	GGCAAACGCTTGCA	-65	-25
SP0386	SP0386	spr0343	SPD_0351	1.60012	2.48003e-09	2.31225e-08				2.28792	4.45279e-11	7.28126e-10				101													sensor histidine kinase, putative	[T] Signal transduction mechanisms	SP0386
SP0387	SP0387	spr0344	SPD_0352							2.1843	9.7907e-11	1.38061e-09	0.533568	0.042887	0.210982	1100				15.67	0.000291827	0.00298074							DNA-binding response regulator	[K] Transcription	SP0387
SP0404	SP0404	spr0366	SPD_0369							0.491657	2.88089e-07	1.18607e-06				100							2.94	0.000368588	0.00241314				hypothetical protein SPD_0369		SP0404
SP0408	SP0408	spr0369	SPD_0372				2.03409	3.3467e-10	4.41841e-09				1.62835	0.0922965	0.360795	1010													sodium:alanine symporter family protein	[E] Amino acid transport and metabolism	SP0408
SP0409	SP0409	spr0370	SPD_0373	2.71895	3.9217e-10	4.66157e-09	4.16324	8.32667e-15	3.89216e-13				1.71706	0.0248033	0.145683	1011													hypothetical protein SPD_0373	[S] Function unknown	SP0409
SP0430	SP0430	spr0389	SPD_0392	0.551727	6.18242e-08	3.66182e-07	0.504487	7.71281e-09	6.85826e-08	0.601945	8.81927e-08	4.2545e-07	0.299849	0.00661333	0.057875	1111													hypothetical protein SPD_0392		SP0430
SP0438	SP0438	spr0395	SPD_0398							0.415791	3.96925e-09	2.99889e-08				100							3.59	4.81e-06	7.65e-05				aspartyl/glutamyl-tRNA amidotransferase subunit C	[J] Translation, ribosomal structure and biogenesis	SP0438
SP0441	SP0441	spr0398	SPD_0401				4.23982	4.52971e-14	1.82189e-12				1.79105	0.0255923	0.14931	1010				0.33	2.85e-07	1.95e-05							50S ribosomal protein L28	[J] Translation, ribosomal structure and biogenesis	SP0441
SP0445	SP0445	spr0401	SPD_0404										2.74957	0.000148236	0.0032472	1000	2.42	0.000295874	0.00247129										acetolactate synthase catalytic subunit	[E] Amino acid transport and metabolism	SP0445	ATGAAATCGGTATCTT	-146	-102
SP0446	SP0446	spr0402	SPD_0405							1.5352	5.96276e-08	2.99687e-07	2.60136	0.00329916	0.0340979	1100													acetolactate synthase 3 regulatory subunit	[E] Amino acid transport and metabolism	SP0446
SP0447	SP0447	spr0403	SPD_0406							2.08353	7.42285e-11	1.12408e-09	2.70311	0.00180002	0.022552	1100													ketol-acid reductoisomerase	[E] Amino acid transport and metabolism	SP0447
SP0449	SP0449	spr0405	SPD_0408	1.68884	1.56381e-09	1.54992e-08				2.14218	3.45594e-11	5.9005e-10				101				1.52	0.000169742	0.00197071				15.65	0.00198348	0.0299067	hypothetical protein SPD_0408		SP0449
SP0454	SP0454	spr0410	SPD_0414							0.578954	3.3534e-08	1.79967e-07	0.481589	0.00193029	0.0235077	1100													hypothetical protein SPD_0414	[S] Function unknown	SP0454
SP0459	SP0459	spr0415	SPD_0420	6.57848	2.77556e-15	1.3914e-13	1.98632	2.37407e-09	2.50363e-08	3.22413	1.61492e-08	9.8507e-08	1.60626	0.000214853	0.00422786	1111	0.39	4.4818e-07	1.77388e-05				0.54	6.35e-05	0.000575537				formate acetyltransferase	[C] Energy production and conversion	SP0459	TGAAATCGGTTACTT	-70	-13	boxes different in D39 and TIGR4
SP0488	SP0488	spr0433	SPD_0437	2.14565	3.81406e-08	2.42962e-07	5.09745	1.13243e-14	5.02188e-13	1.71577	1.71555e-05	4.88974e-05				111													hypothetical protein SPD_0437	[S] Function unknown	SP0488
SP0500	SP0500	spr0442	SPD_0446	0.449856	1.14399e-11	1.96868e-10	0.502286	2.69898e-10	3.69003e-09	0.512894	8.54918e-11	1.26173e-09				111													hypothetical protein SPD_0446	[S] Function unknown	SP0500	TAAAAACGCTTCCT	-68	-42
SP0501	SP0501	spr0443	SPD_0447							0.655836	4.17444e-06	1.30751e-05	0.431135	0.00511316	0.0493328	1100							1.97	0.000188976	0.00142161	3.35	0.00252598	0.034502	transcriptional regulator, MerR family protein	[K] Transcription	SP0501
SP0506	SP0506	spr0447	SPD_0452	2.82391	2.17604e-13	5.70221e-12	2.06017	1.14757e-09	1.28461e-08	3.00741	4.59299e-13	1.68394e-11	3.06593	0.00240301	0.0273519	1111				2.03	1.28e-06	6.03e-05				1.92	0.00776103	0.0755075	integrase/recombinase, phage integrase family protein	[L] Replication, recombination and repair	SP0506
SP0507	SP0507	spr0446	SPD_0450	0.205153	1.60094e-13	4.50216e-12	0.214494	1.5099e-14	6.52844e-13	0.248638	2.93099e-14	1.5951e-12	0.120874	0.000161766	0.00343554	1111													type I restriction-modification system, S subunit, putative		SP0507
SP0515	SP0515	spr0453	SPD_0458				2.16293	4.6294e-07	2.42623e-06	0.617899	4.16921e-06	1.30705e-05				110	2.33	4.5156e-06	0.000103473				3.03	1.12e-06	2.32e-05	1.91	0.00571229	0.0614071	heat-inducible transcription repressor	[K] Transcription	SP0515
SP0516	SP0516	spr0454	SPD_0459				2.18518	6.30871e-08	4.26208e-07							10	2.15	5.01461e-08	3.06419e-06				3.27	4.02e-08	2.41e-06	2.25	0.000912583	0.0196205	heat shock protein GrpE	[O] Posttranslational modification, protein turnover, chaperones	SP0516
SP0517	SP0517	spr0455	SPD_0460				2.14398	2.45036e-08	1.88351e-07							10	1.57	1.44125e-05	0.000235674				3.26	2.26e-07	7.88e-06	1.94	0.00158856	0.0263474	molecular chaperone DnaK	[O] Posttranslational modification, protein turnover, chaperones	SP0517	AATGGAAAAGAATACACTC	downstream of start
SP0545	SP0545	spr0472	SPD_0473	1.63227	5.96361e-06	2.02236e-05				1.63255	4.39829e-07	1.72709e-06	0.241849	7.5876e-05	0.00213126	1101	0.37	9.67681e-06	0.000172843				0.26	0.000128524	0.00103622				immunity protein BlpY		SP0545
SP0546	SP0546	spr0473	SPD_0474										0.105598	0.00147921	0.0195896	1000	0.3	5.1646e-05	0.000642439				0.13	2.88e-06	4.89e-05				hypothetical protein SPD_0474		SP0546
SP0547	SP0547	spr0474	SPD_0475	1.68592	6.43489e-08	3.76621e-07				2.0987	6.20964e-09	4.39597e-08	0.103715	0.000127357	0.00289924	1101	0.37	0.000296828	0.00246742				0.17	9.64e-07	2.06e-05				CAAX amino terminal protease family protein		SP0547
SP0549	SP0549	spr0475	SPD_0476	0.635065	4.45173e-08	2.77952e-07				0.490916	1.82125e-09	1.51034e-08				101	1.7	3.43091e-06	8.47509e-05				4.27	5.1e-06	7.92e-05				hypothetical protein SPD_0476	[M] Cell wall/membrane/envelope biogenesis	SP0549
SP0550	SP0550	spr0476	SPD_0477				2.08921	9.0139e-12	1.77154e-10				2.23975	0.0068512	0.05936	1010													tRNA (guanine-N(7))-methyltransferase	[R] General function prediction only	SP0550
SP0577	SP0577	spr0505	SPD_0502	2.6644	2.45048e-11	3.94243e-10	1.93742	1.35876e-05	4.85534e-05	1.5949	1.23139e-07	5.66568e-07	41.6818	0.00308119	0.0323247	1111													PTS system, beta-glucosides-specific IIABC components	[G] Carbohydrate transport and metabolism	SP0577
SP0578	SP0578	spr0506	SPD_0503	2.80628	1.63071e-11	2.71183e-10	1.71546	1.25724e-08	1.0479e-07	2.16692	2.49479e-11	4.52571e-10	19.3644	0.0205371	0.128652	1111													6-phospho-beta-glucosidase	[G] Carbohydrate transport and metabolism	SP0578
SP0586	SP0586	spr0515	SPD_0511							1.80252	9.3093e-08	4.44169e-07	3.16909	0.000135748	0.00303082	1100										0.46	0.00182047	0.0286909	5,10-methylenetetrahydrofolate reductase	[E] Amino acid transport and metabolism	SP0586
SP0593	SP0593	spr0521	SPD_0517	2.34337	6.98361e-11	1.03232e-09				2.19377	1.22456e-10	1.6726e-09	0.648489	0.000406382	0.00707714	1101													hypothetical protein SPD_0517	[Q] Secondary metabolites biosynthesis, transport and catabolism	SP0593
SP0598	SP0598	spr0524	SPD_0521							0.451999	1.65926e-08	1.00508e-07				100													ABC transporter, transmembrane protein Vexp1		SP0598
SP0605	SP0605	spr0530	SPD_0526							0.441007	7.80529e-10	7.61508e-09				100							2.8	8.28e-08	4.01e-06				fructose-bisphosphate aldolase	[G] Carbohydrate transport and metabolism	SP0605	GAGAAAGGGTTTACAT	-130	-74	unclear promoter
SP0606	SP0606	spr0531	SPD_0527	0.334409	1.62759e-13	4.50386e-12	1.78741	7.23047e-08	4.74577e-07	0.462543	9.17422e-12	1.87964e-10	2.55734	0.0162925	0.109128	1111	4.89	2.01066e-09	3.33481e-07				3.03	4.36e-05	0.000417457				oxidoreductase, putative	[P] Inorganic ion transport and metabolism	SP0606
SP0626	SP0626	spr0551	SPD_0546	1.68296	2.88606e-06	1.06769e-05				1.54803	2.66943e-07	1.10818e-06	0.498333	0.00592599	0.054032	1101	0.61	0.000640155	0.00457836				0.23	0.000434282	0.00274022				branched-chain amino acid transport system II carrier protein	[E] Amino acid transport and metabolism	SP0626
SP0630	SP0630	spr0555	SPD_0550							0.431107	2.24095e-10	2.74832e-09				100							8.34	5.76e-07	1.39e-05				50S ribosomal protein L11	[J] Translation, ribosomal structure and biogenesis	SP0630
SP0631	SP0631	spr0556	SPD_0551				4.03395	7.32747e-13	1.86366e-11							10				0.47	1.2e-07	1.16e-05	3.35	2.29e-06	4.05e-05	4.07	0.000385205	0.0115661	50S ribosomal protein L1	[J] Translation, ribosomal structure and biogenesis	SP0631
SP0645	SP0645	spr0562	SPD_0559	4.96793	2.88658e-15	1.42638e-13	3.172	1.26565e-14	5.54164e-13	3.81748	8.22675e-14	3.72127e-12				111	0.36	3.98647e-06	9.4455e-05										PTS system IIA component, putative	[G] Carbohydrate transport and metabolism	SP0645	TTGACAACGGTTTCAT	-45	-15
SP0646	SP0646	spr0563	SPD_0560	5.42758	6.66134e-16	4.26696e-14	2.65672	2.84884e-11	5.00211e-10	4.28766	7.23865e-13	2.37851e-11				111	0.31	1.67906e-06	4.99843e-05							15.46	0.00454932	0.0533511	PTS system, IIB component, putative	[G] Carbohydrate transport and metabolism	SP0646
SP0647	SP0647	spr0564	SPD_0561	9.06712	3.33067e-16	2.35118e-14	3.50897	4.83613e-13	1.29676e-11	10.2554	3.29736e-14	1.71414e-12	3.1533	0.000158054	0.00339815	1111	0.25	3.72014e-09	5.1829e-07										PTS system, IIC component, putative	[G] Carbohydrate transport and metabolism	SP0647
SP0648	SP0648	spr0565	SPD_0562	10.5182	4.88498e-15	2.1663e-13	2.64302	6.9803e-10	8.38363e-09	12.3931	1.10134e-13	4.67801e-12	2.46244	8.35254e-05	0.0022907	1111	0.19	1.66349e-11	6.43771e-09				0.21	9.81e-08	4.38e-06	2.08	0.00156748	0.0261221	beta-galactosidase precursor, putative	[G] Carbohydrate transport and metabolism	SP0648
SP0668	SP0668	spr0584	SPD_0580	2.04412	1.26268e-11	2.15153e-10	1.96823	1.25925e-11	2.32927e-10	1.81351	1.249e-09	1.11832e-08				111													glucokinase	[G] Carbohydrate transport and metabolism	SP0668	CTGTAAGCATTTTCAA	-37	-16
SP0670	SP0670	spr0586	SPD_0582							0.405301	3.16683e-11	5.46044e-10				100							2.57	0.000405645	0.00261157				hypothetical protein SPD_0582		SP0670
SP0679	SP0679	spr0596	SPD_0591	2.12981	1.79279e-08	1.25786e-07	2.32621	4.10293e-11	7.06071e-10				4.71568	0.0552908	0.252727	1011													hypothetical protein SPD_0591		SP0679
SP0682	SP0682	spr0599	SPD_0594				0.635028	8.04483e-09	7.13514e-08				0.339977	0.0012499	0.0175541	1010													hypothetical protein SPD_0594		SP0682
SP0684	SP0684	spr0600	SPD_0595	7.01101	2.59459e-13	6.74789e-12	5.15841	6.56142e-14	2.44042e-12	5.52674	6.99441e-15	5.1833e-13				111													hypothetical protein SPD_0595		SP0684
SP0685	SP0685	spr0600	SPD_0595	5.63346	5.77094e-13	1.37667e-11	4.52933	8.10285e-12	1.6201e-10	3.51717	8.87001e-10	8.51081e-09				111													hypothetical protein SPD_0595		SP0685
SP0686	SP0686	spr0601	SPD_0596	75.3438	1.11022e-16	1.09722e-14	33.4225	0	0	45.5707	3.33067e-16	5.27305e-14	56.7516	2.71084e-06	0.000196705	1111	0.46	0.000139777	0.00134859							2.35	0.00015184	0.00669442	hypothetical protein SPD_0596	[S] Function unknown	SP0686
SP0687	SP0687	spr0602	SPD_0597	106.352	1.11022e-16	8.72787e-15	56.9188	0	0	57.5027	1.66534e-15	1.70599e-13	90.8361	5.16676e-06	0.000305014	1111	0.39	4.09708e-05	0.000536471							4.39	2.05e-06	0.0011891	ABC transporter, ATP-binding protein	[V] Defense mechanisms	SP0687
SP0701	SP0701	spr0613	SPD_0608				2.31727	3.99588e-08	2.87354e-07	0.235732	1.23225e-07	5.66218e-07				110	2.01	0.000139131	0.00134984				32.42	4.31e-08	2.5e-06				orotidine 5'-phosphate decarboxylase	[F] Nucleotide transport and metabolism	SP0701
SP0702	SP0702	spr0614	SPD_0609	1.65173	3.52044e-08	2.25922e-07	3.64057	1.73324e-10	2.52965e-09	0.226959	2.96726e-08	1.6199e-07	3.34084	0.00147966	0.0195215	1111	2.67	5.64274e-05	0.000687191				24.18	1.04e-11	1.21e-08				orotate phosphoribosyltransferase	[F] Nucleotide transport and metabolism	SP0702
SP0704	SP0704	spr0616	SPD_0611	37.5777	0	0	29.7119	0	0	18.254	0	0				111										4.73	0.00016412	0.00688712	hypothetical protein SPD_0611		SP0704
SP0705	SP0705	spr0617	SPD_0612	42.1404	1.11022e-16	9.36649e-15	30.3138	0	0	24.7718	2.10942e-15	1.98571e-13	89.6363	6.58017e-05	0.00197575	1111										4.22	6.94e-05	0.00474106	hypothetical protein SPD_0612		SP0705
SP0706	SP0706	spr0618	SPD_0613	41.9397	0	0	27.2823	0	0	27.4538	0	0				111										10.26	0.00180258	0.0289327	hypothetical protein SPD_0613		SP0706
SP0707	SP0707	spr0619	SPD_0614	41.7096	0	0	25.4097	0	0	27.4324	0	0				111										14.89	4.36e-05	0.00379304	ABC transporter, ATP-binding protein	[V] Defense mechanisms	SP0707
SP0709	SP0709	spr0622	SPD_0616	5.65801	4.77396e-15	2.14456e-13	3.9204	1.28786e-13	4.36736e-12	2.72561	4.41431e-11	7.25238e-10				111													amino acid ABC transporter, ATP-binding protein	[E] Amino acid transport and metabolism	SP0709
SP0710	SP0710	spr0623	SPD_0617	3.56795	7.28306e-14	2.3544e-12	2.84794	1.29223e-11	2.37757e-10	2.15874	4.52008e-10	4.93525e-09				111													amino acid ABC transporter, permease protein	[E] Amino acid transport and metabolism	SP0710
SP0711	SP0711	spr0624	SPD_0618	3.91303	5.16476e-13	1.25809e-11	2.5107	2.25347e-10	3.18154e-09	2.16725	1.13427e-09	1.0342e-08				111													amino acid ABC transporter, permease protein	[E] Amino acid transport and metabolism	SP0711
SP0715	SP0715	spr0627	SPD_0621	13.4479	1.11022e-16	8.93084e-15	5.83044	8.32667e-15	3.84026e-13	9.3774	1.62315e-13	6.65108e-12	4.28079	1.3828e-07	2.53488e-05	1111	0.32	1.05766e-08	9.44572e-07				0.24	1.51e-08	1.35e-06	1.9	0.000312861	0.0101841	lactate oxidase	[C] Energy production and conversion	SP0715	AAGCAAACGCTTACTT	-26	27
SP0722	SP0722	spr0634	SPD_0628	2.1275	2.30182e-10	2.92721e-09	0.630161	8.02266e-08	5.16767e-07	1.651	7.59329e-09	5.23711e-08				111				2.53	1.75e-05	0.00040613							transcriptional activator TenA, TENA/THI-4 family protein	[K] Transcription	SP0722
SP0724	SP0724	spr0636	SPD_0630	2.40916	5.68411e-09	4.63711e-08				1.59013	3.06665e-08	1.67154e-07				101				2.45	4.12e-05	0.000713233							hydroxyethylthiazole kinase, putative	[H] Coenzyme transport and metabolism	SP0724
SP0725	SP0725	spr0637	SPD_0631	2.47961	6.03342e-10	6.73212e-09				1.78025	4.51533e-09	3.36044e-08				101													thiamine-phosphate pyrophosphorylase	[H] Coenzyme transport and metabolism	SP0725
SP0726	SP0726	spr0638	SPD_0632	2.31832	8.86291e-13	2.03025e-11				1.83474	1.02557e-09	9.57653e-09	0.641353	0.00162573	0.0209719	1101													phosphomethylpyrimidine kinase	[H] Coenzyme transport and metabolism	SP0726
SP0742	SP0742	spr0652	SPD_0646	0.42931	9.75664e-13	2.19144e-11	0.423175	5.48395e-12	1.14271e-10	0.549363	5.67236e-09	4.04025e-08				111										0.24	1.35e-05	0.00187392	hypothetical protein SPD_0646	[S] Function unknown	SP0742
SP0748	SP0748	spr0657	SPD_0651							0.469456	8.92723e-11	1.29556e-09				100							4.93	0.000133076	0.00106553				hypothetical protein SPD_0651	[S] Function unknown	SP0748
SP0754	SP0754	spr0664	SPD_0657	4.08507	8.62976e-13	1.99002e-11	3.65791	2.2804e-13	6.68466e-12	2.22776	1.6064e-09	1.37135e-08				111													acetoin utilization protein AcuB, putative	[K] Transcription	SP0754	ATGTAAGCGTTTGATA	-61	-26
SP0758	SP0758	spr0668	SPD_0661				6.5895	1.11022e-16	1.06674e-14				21.6816	0.000300462	0.00542233	1010				0.14	4.39e-13	2.18e-10				0.12	2.48e-05	0.00287479	PTS system, IIABC components	[G] Carbohydrate transport and metabolism	SP0758	ACGAAAACGTTTGCAC	-70	27
SP0760	SP0760	spr0669	SPD_0662				2.22802	1.0783e-10	1.6651e-09				3.30714	0.000371057	0.00662765	1010				0.3	2.55e-06	0.000101889	0.2	4.91e-06	7.71e-05	0.09	0.000179115	0.0073395	hypothetical protein SPD_0662	[R] General function prediction only	SP0760
SP0766	SP0766	spr0674	SPD_0667	3.74017	1.4036e-11	2.37993e-10	3.02569	7.05769e-13	1.80834e-11				2.18041	0.0201725	0.127054	1011	0.53	1.78042e-06	5.16767e-05				2.57	7.44e-06	0.000105407	4.47	0.000766838	0.0176881	superoxide dismutase, manganese-dependent	[P] Inorganic ion transport and metabolism	SP0766	AATGTTTGCGTTATCATTT	-39	-3
SP0776	SP0776	spr0683	SPD_0675				4.73453	2.61236e-13	7.53011e-12				1.64027	0.0629278	0.278498	1010				0.27	1.92e-07	1.59e-05							hypothetical protein SPD_0675	[R] General function prediction only	SP0776
SP0777	SP0777	spr0684	SPD_0676							0.400803	1.34177e-11	2.55376e-10				100							3.54	8.45e-08	4.03e-06				hypothetical protein SPD_0676	[R] General function prediction only	SP0777
SP0782	SP0782	spr0690	SPD_0683	4.63293	1.68754e-13	4.6327e-12	7.04601	0	0	3.21362	3.27253e-07	1.33469e-06	4.64678	8.39977e-05	0.00228566	1111													hypothetical protein SPD_0683	[S] Function unknown	SP0782
SP0783	SP0783	spr0691	SPD_0684	0.46856	8.7346e-10	9.23944e-09	0.432489	4.45336e-11	7.58826e-10	0.422874	6.81887e-11	1.04626e-09	0.181435	0.026927	0.154001	1111													biotin synthase (BioY family protein), putative	[R] General function prediction only	SP0783
SP0786	SP0786	spr0694	SPD_0687	1.568	1.7476e-09	1.7028e-08	1.5481	1.05171e-08	9.02698e-08	2.21344	5.71181e-11	8.92118e-10				111													ABC transporter ATP-binding protein	[V] Defense mechanisms	SP0786
SP0787	SP0787	spr0695	SPD_0688	1.70807	3.29907e-09	2.9487e-08				2.43511	6.76459e-12	1.5007e-10				101										3.12	0.000726174	0.0170896	hypothetical protein SPD_0688	[V] Defense mechanisms	SP0787
SP0804	SP0804	spr0713	SPD_0707							1.51748	1.66084e-08	1.00429e-07	0.398262	0.00452657	0.0447899	1100													4-methyl-5(b-hydroxyethyl)-thiazole monophosphate biosynthesis protein, putative	[R] General function prediction only	SP0804
SP0816	SP0816	spr0720	SPD_0714							0.419096	1.74928e-11	3.27566e-10	0.536853	0.0339705	0.180365	1100	0.48	5.72185e-05	0.000691986										hypothetical protein SPD_0714		SP0816	TGAAATCGAAACCAT	downstream of start
SP0822	SP0822	spr0726	SPD_0718							0.43531	7.30618e-10	7.22938e-09				1100													hypothetical protein SPD_0718	[S] Function unknown	SP0822
SP0824	SP0824	spr0728	SPD_0720				0.426179	2.84719e-10	3.86212e-09							10													amino acid ABC transporter, ATP-binding protein	[E] Amino acid transport and metabolism	SP0824
SP0825	SP0825	spr0729	SPD_0721				0.416914	4.42969e-11	7.5853e-10							10													methylenetetrahydrofolate dehydrogenase/methenyltetrahydrofolate cyclohydrolase	[H] Coenzyme transport and metabolism	SP0825
SP0833	SP0833	spr0735	SPD_0727	1.87087	9.74204e-10	1.02114e-08				2.39521	1.84082e-11	3.37451e-10	0.57361	0.0364418	0.191155	1101	0.63	1.53767e-05	0.000249102							4.76	7.51e-05	0.00484216	hypothetical protein SPD_0727		SP0833
SP0834	SP0834	spr0737	SPD_0729	1.95095	1.07731e-10	1.52722e-09				2.12691	1.02924e-10	1.4397e-09				101	0.59	1.07445e-06	3.53048e-05							6.95	0.00191054	0.0290585	hemolysin-related protein		SP0834
SP0835	SP0835	spr0738	SPD_0730	1.79469	1.13559e-10	1.59675e-09				2.0114	1.11531e-09	1.01958e-08				101													purine nucleoside phosphorylase	[F] Nucleotide transport and metabolism	SP0835
SP0837	SP0837	spr0739	SPD_0731	0.610632	6.61847e-08	3.85409e-07				0.147612	6.31162e-13	2.11379e-11				101							20.11	3e-07	9.01e-06				topology modulation protein	[F] Nucleotide transport and metabolism	SP0837
SP0838	SP0838	spr0740	SPD_0732				3.33276	8.21565e-15	3.89287e-13	0.638554	2.69062e-05	7.39071e-05				110				0.43	6.49e-07	3.65e-05	2.24	0.000523279	0.0031642				30S ribosomal protein S20	[J] Translation, ribosomal structure and biogenesis	SP0838
SP0839	SP0839	spr0741	SPD_0733	2.96653	2.0306e-13	5.40295e-12	4.24414	1.03251e-14	4.69927e-13	2.64799	1.55804e-10	2.00987e-09	3.75611	0.00557569	0.0519255	1111													pantothenate kinase	[H] Coenzyme transport and metabolism	SP0839	ATAAAGCGGTTTCT	-46	no clear promoter
SP0848	SP0848	spr0750	SPD_0742							2.00925	8.53665e-10	8.25921e-09	0.665215	0.00875542	0.069943	1100													sugar ABC transporter, permease protein, putative	[R] General function prediction only	SP0848
SP0868	SP0868	spr0772	SPD_0763							2.42524	2.20316e-10	2.71153e-09	0.536827	0.00156771	0.0204508	1100										2.3	0.00123412	0.0234888	hypothetical protein SPD_0763	[O] Posttranslational modification, protein turnover, chaperones	SP0868
SP0869	SP0869	spr0773	SPD_0764							3.29997	3.06177e-12	8.39697e-11	0.328786	0.00390453	0.0396486	1100										8.59	0.000104042	0.00575205	cysteine desulfurases, SufS subfamily protein	[E] Amino acid transport and metabolism	SP0869
SP0870	SP0870	spr0774	SPD_0765				0.619442	4.76341e-07	2.49268e-06	3.0693	3.86125e-12	9.96201e-11	0.344642	0.00125619	0.0173624	1110										7.25	1.12e-05	0.00185806	SUF system FeS assembly protein, NifU family protein	[C] Energy production and conversion	SP0870
SP0871	SP0871	spr0775	SPD_0766				0.569854	2.80033e-07	1.56484e-06	2.93085	3.1725e-10	3.72048e-09	0.469643	0.000123484	0.00286729	1110				1.57	2.32e-05	0.00049608	0.47	0.000112516	0.000930864	2.41	0.000558125	0.0143996	FeS assembly protein SufB	[O] Posttranslational modification, protein turnover, chaperones	SP0871
SP0875	SP0875	spr0778	SPD_0771				2.74825	2.54985e-12	5.91941e-11							10				0.44	2.67e-07	1.94e-05							lactose phosphotransferase system repressor	[G] Carbohydrate transport and metabolism	SP0875	AGTGTAAACGATAACAGGA	-19	18
SP0876	SP0876	spr0779	SPD_0772				3.14301	9.60343e-14	3.35538e-12				12.4903	0.00618265	0.0553578	1010													1-phosphofructokinase, putative	[G] Carbohydrate transport and metabolism	SP0876
SP0877	SP0877	spr0780	SPD_0773	2.03805	9.28058e-12	1.68071e-10	2.87325	8.71314e-12	1.72221e-10	1.82428	1.23126e-09	1.10814e-08	1.74766	7.07306e-05	0.0020193	1111							0.23	2.38e-06	4.14e-05	0.21	6.03e-06	0.00175119	PTS system, fructose specific IIABC components	[G] Carbohydrate transport and metabolism	SP0877
SP0879	SP0879	spr0782	SPD_0775	2.39606	1.07241e-08	7.94315e-08	1.76638	2.43542e-08	1.8762e-07	1.75103	1.24737e-07	5.71658e-07				111							3.08	9.8e-05	0.000824842				hypothetical protein SPD_0775		SP0879
SP0896	SP0896	spr0796	SPD_0789	0.657436	2.8436e-06	1.0565e-05	0.485842	5.54112e-12	1.14088e-10	0.418197	8.77126e-11	1.28904e-09	0.541121	0.00043941	0.00757656	1111							2.04	1.74e-05	0.00020032				6-phosphofructokinase	[G] Carbohydrate transport and metabolism	SP0896
SP0904	SP0904	spr0804	SPD_0797							2.66479	5.92282e-12	1.34831e-10	0.207535	0.0154455	0.104867	1100	0.64	5.98997e-05	0.000716944							13.51	0.00240669	0.0342143	hypothetical protein SPD_0797	[S] Function unknown	SP0904
SP0908	SP0908	spr0808	SPD_0802							1.66844	9.25861e-09	6.15415e-08	0.497754	2.82208e-05	0.0009543	1100	0.67	6.99969e-05	0.000809964				0.4	2.26e-05	0.00024581				S1 RNA-binding domain-containing protein	[K] Transcription	SP0908
SP0922	SP0922	spr0823	SPD_0815	1.63696	6.82172e-09	5.43694e-08				1.55665	5.58282e-07	2.12513e-06	0.476128	0.00914511	0.0723919	1101													hydrolase, carbon-nitrogen family protein	[R] General function prediction only	SP0922
SP0959	SP0959	spr0861	SPD_0847							0.48728	9.5073e-08	4.52376e-07	1.94832	0.0810972	0.329978	1100							10.13	3.56e-08	2.34e-06	3.42	0.00394368	0.0480274	translation initiation factor IF-3	[J] Translation, ribosomal structure and biogenesis	SP0959
SP0961	SP0961	spr0863	SPD_0849				2.09651	4.7401e-12	9.99756e-11	0.630463	3.94971e-06	1.24271e-05				110				0.61	0.000240293	0.00253618	8.7	2.34e-07	7.93e-06				50S ribosomal protein L20	[J] Translation, ribosomal structure and biogenesis	SP0961
SP0962	SP0962	spr0864	SPD_0850				1.70412	3.9689e-09	3.80289e-08	0.455725	1.41333e-09	1.23996e-08				110							9.55	2.29e-06	4.03e-05				lactoylglutathione lyase	[E] Amino acid transport and metabolism	SP0962
SP0963	SP0963	spr0865	SPD_0851				1.81982	7.9269e-10	9.32624e-09	0.221176	1.24107e-07	5.69519e-07				110							48.98	3.5e-10	9.37e-08				dihydroorotate dehydrogenase electron transfer subunit	[C] Energy production and conversion	SP0963
SP0964	SP0964	spr0866	SPD_0852				1.54208	1.04092e-07	6.47582e-07	0.389212	4.50365e-06	1.40432e-05				110							14.15	2.27e-07	7.84e-06	27.33	0.000431608	0.0124239	dihydroorotate dehydrogenase 1B	[F] Nucleotide transport and metabolism	SP0964
SP0975	SP0975	spr0878	SPD_0862				1.57859	4.57161e-10	5.85674e-09				2.81437	0.00909239	0.0721385	1010													ribonuclease R	[K] Transcription	SP0975
SP0979	SP0979	spr0882	SPD_0866				1.50959	3.06999e-08	2.2642e-07	0.432542	8.63496e-10	8.30817e-09				110							6.21	8.08e-07	1.81e-05				oligoendopeptidase F	[E] Amino acid transport and metabolism	SP0979
SP1001	SP1001	spr0905	SPD_0887	0.59702	1.94661e-09	1.87557e-08	0.479563	6.10652e-10	7.49024e-09				0.458011	0.0700303	0.298916	1011													amino acid permease family protein	[E] Amino acid transport and metabolism	SP1001
SP1002	SP1002	spr0906	SPD_0888	0.613717	4.50104e-08	2.79517e-07	0.384489	1.25522e-12	3.03622e-11				0.0775113	0.0333198	0.177995	1011													adhesion lipoprotein	[P] Inorganic ion transport and metabolism	SP1002
SP1003	SP1003	spr0907	SPD_0889	0.661777	5.56418e-07	2.51588e-06	0.395519	1.92069e-13	5.87934e-12				0.355773	0.00576635	0.0534154	1011													pneumococcal histidine triad protein D precursor		SP1003
SP1009	SP1009	spr0914	SPD_0895	3.71908	1.74971e-13	4.76555e-12	2.37105	1.79621e-09	1.92356e-08	2.90252	1.75982e-11	3.27777e-10				111													ferrochelatase	[H] Coenzyme transport and metabolism	SP1009
SP1012	SP1012	spr0917	SPD_0898				1.86184	6.4202e-08	4.32052e-07	0.496333	3.03698e-09	2.35062e-08				110										0.3	5.6e-06	0.00177204	hypothetical protein SPD_0898	[S] Function unknown	SP1012
SP1017	SP1017	spr0921	SPD_0903							0.429075	1.43094e-11	2.70868e-10				100													4-oxalocrotonate tautomerase	[R] General function prediction only	SP1017
SP1018	SP1018	spr0922	SPD_0904	0.634619	1.8878e-08	1.31651e-07				0.403945	1.2291e-09	1.11193e-08				101													thymidine kinase	[F] Nucleotide transport and metabolism	SP1018
SP1072	SP1072	spr0978	SPD_0957							0.421986	5.53269e-09	3.998e-08				100							9.08	1.43e-09	2.37e-07				DNA primase	[L] Replication, recombination and repair	SP1072
SP1084	SP1084	spr0992	SPD_0970							2.35258	1.58956e-09	1.36366e-08				100										4.29	6.66e-06	0.00165634	methionine aminopeptidase	[J] Translation, ribosomal structure and biogenesis	SP1084
SP1097	SP1097	spr1004	SPD_0982	2.95032	1.70852e-12	3.62563e-11	2.08239	1.18695e-10	1.80867e-09	2.67079	1.13277e-11	2.20416e-10	1.98066	0.00669001	0.0582533	1111													pyrophosphokinase family protein	[S] Function unknown	SP1097	TTGAAAGCGGATTTAT	-98	-10
SP1098	SP1098	spr1005	SPD_0983	3.61953	2.1283e-13	5.61968e-12	2.27383	5.49771e-12	1.13872e-10	4.04313	3.68594e-14	1.88796e-12	1.70915	0.0167397	0.111694	1111	0.6	6.06307e-06	0.000126453				0.39	2.44e-05	0.000260875				inorganic polyphosphate/ATP-NAD kinase	[G] Carbohydrate transport and metabolism	SP1098
SP1099	SP1099	spr1006	SPD_0984	3.36312	5.3757e-13	1.29129e-11	1.93426	3.49071e-10	4.57363e-09	4.44603	3.03091e-14	1.6241e-12	1.52225	0.0105746	0.0798947	1111	0.64	9.15338e-05	0.000996288				0.39	1.16e-05	0.000147497				ribosomal large subunit pseudouridine synthase, RluD subfamily protein	[J] Translation, ribosomal structure and biogenesis	SP1099
SP1100	SP1100	spr1007	SPD_0985	3.91507	8.08242e-14	2.56487e-12	2.11803	1.84551e-10	2.68219e-09	6.08335	5.21805e-15	4.03877e-13				111	0.53	8.0769e-07	2.81318e-05				0.33	2.12e-05	0.000232057				phosphotransacetylase	[C] Energy production and conversion	SP1100
SP1102	SP1102	spr1010	SPD_0987							0.479593	6.30047e-10	6.49247e-09				100													hypothetical protein SPD_0987	[S] Function unknown	SP1102
SP1105	SP1105	spr1012	SPD_0989							0.417038	8.96069e-09	6.0135e-08	0.544284	0.0292539	0.162506	1100							12.94	9.21e-10	1.69e-07	7.67	0.0010436	0.0208899	50S ribosomal protein L21	[J] Translation, ribosomal structure and biogenesis	SP1105
SP1106	SP1106	spr1013	SPD_0990							0.53025	6.97531e-07	2.60118e-06	0.471829	0.00711884	0.0606233	1100							6.54	3.83e-08	2.43e-06	5.47	0.00181623	0.0287543	hypothetical protein SPD_0990	[J] Translation, ribosomal structure and biogenesis	SP1106
SP1116	SP1116	spr1023	SPD_1000										0.264607	0.00767343	0.0642465	1000													transporter, major facilitator family protein		SP1116
SP1117	SP1117	spr1024	SPD_1001							0.611825	1.86843e-08	1.11054e-07	0.428222	0.00808152	0.0663867	1100													NAD-dependent DNA ligase LigA	[L] Replication, recombination and repair	SP1117
SP1119	SP1119	spr1028	SPD_1004	3.91095	1.03584e-13	3.06236e-12	2.0009	1.02714e-08	8.86008e-08	2.88642	7.88702e-13	2.56734e-11	4.24413	9.1387e-05	0.00237538	1111				2.09	4.37e-07	2.53e-05							glyceraldehyde-3-phosphate dehydrogenase, NADP-dependent	[C] Energy production and conversion	SP1119
SP1121	SP1121	spr1029	SPD_1005	31.7364	0	0	21.3401	0	0	20.7899	6.66134e-16	8.59313e-14	38.4533	2.25081e-08	8.71063e-06	1111													glycogen branching enzyme	[G] Carbohydrate transport and metabolism	SP1121
SP1121	SP1121	spr1029	SPD_1005	40.4682	0	0	21.3401	0	0							11										2.33	0.000892575	0.0195524	glycogen branching enzyme	[G] Carbohydrate transport and metabolism	SP1121	TAGAAAACGCTTACAG	-22	20
SP1122	SP1122	spr1030	SPD_1006	40.0119	0	0	32.104	0	0	41.2615	0	0	23.9984	1.35849e-06	0.00011829	1111	0.52	0.000573425	0.00419588				0.15	1.29e-05	0.000159635	2.09	0.00015765	0.00677893	glucose-1-phosphate adenylyltransferase	[G] Carbohydrate transport and metabolism	SP1122
SP1123	SP1123	spr1031	SPD_1007	42.7085	0	0	26.4749	0	0	40.7928	1.11022e-16	2.41682e-14	60.3879	6.62211e-07	7.95338e-05	1111	0.43	9.23755e-05	0.000999204				0.18	0.00018548	0.00140136	1.93	0.000294962	0.0097843	glucose-1-phosphate adenylyltransferase, GlgD subunit	[G] Carbohydrate transport and metabolism	SP1123
SP1124	SP1124	spr1032	SPD_1008	10.2699	2.54057e-07	1.25183e-06	20.4496	1.66534e-15	9.76338e-14	8.6524	3.62618e-08	1.93415e-07	26.4127	1.97158e-07	3.4335e-05	1111	0.06	8.61739e-08	4.68975e-06	0.18	5.41e-05	0.000859741	0.01	6.58e-06	9.75e-05	0.13	7.5e-05	0.00492944	glycogen synthase	[G] Carbohydrate transport and metabolism	SP1124
SP1126	SP1126	spr1034	SPD_1011	10.8178	4.32987e-15	1.99694e-13	6.46589	6.23257e-12	1.26814e-10	6.85128	1.55431e-15	1.69177e-13	8.11624	1.08057e-06	0.000101719	1111										0.27	3.6e-05	0.00358626	glycerate kinase	[G] Carbohydrate transport and metabolism	SP1126	TTAAACTGCTTTCA	-502	no clear promtoer box very far upstream of start (-502 bp)
SP1127	SP1127	spr1035	SPD_1010	3.41789	1.8141e-13	4.90233e-12	3.11183	5.07705e-13	1.35089e-11	1.90893	3.46192e-06	1.09717e-05	3.35331	0.0243897	0.143982	1111	0.48	0.000797843	0.00541694										hypothetical protein SPD_1010	[S] Function unknown	SP1127	AAGTAATCGCTTTCTT	-47	-35
SP1152	SP1152	spr1040	SPD_1016							1.60976	3.41404e-08	1.8294e-07	0.395249	0.000523681	0.00868563	1100							0.32	1.11e-05	0.000143447				exonuclease RexA	[L] Replication, recombination and repair	SP1152
SP1159	SP1159	spr1046	SPD_1023	0.3777	9.73999e-13	2.202e-11							1.51359	0.0448476	0.218773	1001	1.9	0.000115563	0.00116668	0.46	0.000116242	0.00148	0.39	7.99e-05	0.000687445				site-specific tyrosine recombinase XerS	[L] Replication, recombination and repair	SP1159
SP1160	SP1160	spr1047	SPD_1024	0.359881	1.60427e-13	4.47514e-12	0.549251	8.74704e-10	1.0153e-08				0.620048	0.0031438	0.0328824	1011							0.3	2.24e-06	3.99e-05	0.36	0.00689716	0.0694301	lipoate-protein ligase, putative	[H] Coenzyme transport and metabolism	SP1160
SP1161	SP1161	spr1048	SPD_1025	0.36085	1.09324e-12	2.43968e-11	0.595922	1.16329e-09	1.298e-08							11				0.55	4.94e-05	0.000810934	0.43	0.000662176	0.00381216				dihydrolipoamide dehydrogenase	[C] Energy production and conversion	SP1161
SP1162	SP1162	spr1049	SPD_1026	0.321317	3.86358e-14	1.34991e-12	0.48256	5.03642e-12	1.05582e-10	0.583632	2.27759e-08	1.31775e-07				111				0.55	6.11e-05	0.000934017	0.42	0.000111316	0.000923131				dihydrolipoamide acetyltransferase	[C] Energy production and conversion	SP1162	ATCGAAAACGATAGCATCA	downstream of start
SP1163	SP1163	spr1050	SPD_1027	0.322314	8.21565e-14	2.58345e-12				0.525532	8.1471e-09	5.50997e-08				101				0.44	1.28e-06	6.11e-05	0.5	0.000884803	0.0048228	0.18	0.00248899	0.0346766	acetoin dehydrogenase, E1 component, beta subunit, putative	[C] Energy production and conversion	SP1163
SP1164	SP1164	spr1051	SPD_1028	0.339675	2.79776e-13	7.16849e-12				0.279961	1.59628e-12	4.67213e-11				101				0.39	2.7e-07	1.92e-05				0.17	0.00288192	0.0381663	TPP-dependent acetoin dehydrogenase alpha-subunit	[C] Energy production and conversion	SP1164
SP1178	SP1178	spr1064	SPD_1041							0.392094	1.59017e-12	4.6937e-11	0.465453	0.0133317	0.094379	1100													glutaredoxin-like protein NrdH	[O] Posttranslational modification, protein turnover, chaperones	SP1178
SP1182	SP1182	spr1067	SPD_1044							0.552659	9.86505e-09	6.45864e-08	0.390832	0.00113141	0.016284	1100													lactose phosphotransferase system repressor	[G] Carbohydrate transport and metabolism	SP1182
SP1190	SP1190	spr1073	SPD_1050	1.95265	4.97536e-10	5.73659e-09	0.128161	2.55351e-15	1.35886e-13	2.41209	2.14932e-10	2.6736e-09	0.21353	1.06188e-07	2.46569e-05	1111	0.12	1.98064e-13	1.72464e-10	1.79	5.05e-06	0.000166	0.05	1.85e-12	3.22e-09	0.56	0.00462174	0.0538379	tagatose 1,6-diphosphate aldolase	[G] Carbohydrate transport and metabolism	SP1190	GATGAAAATGGTATCATCT	downstream of start		in lac operon
SP1191	SP1191	spr1074	SPD_1051	1.87138	4.55959e-10	5.3103e-09	0.169571	2.55351e-15	1.38009e-13	2.02616	7.53717e-11	1.13155e-09	0.207858	5.13447e-09	4.47084e-06	1111	0.08	1.9762e-14	6.88309e-11				0.05	7.32e-11	3.19e-08	0.41	0.000458944	0.0126865	tagatose-6-phosphate kinase	[G] Carbohydrate transport and metabolism	SP1191
SP1192	SP1192	spr1075	SPD_1052	1.81411	2.87981e-10	3.54493e-09	0.189883	1.11022e-16	1.23879e-14				0.193275	3.26958e-07	4.37998e-05	1011	0.09	4.89608e-14	5.68435e-11				0.05	7.99e-11	3.09e-08				galactose-6-phosphate isomerase subunit LacB	[G] Carbohydrate transport and metabolism	SP1192
SP1193	SP1193	spr1076	SPD_1053	1.61463	6.95263e-09	5.51586e-08	0.181929	6.66134e-16	4.80033e-14				0.188886	2.06117e-07	3.4186e-05	1011	0.09	4.22995e-14	7.36646e-11				0.09	6.51e-11	3.24e-08				galactose-6-phosphate isomerase subunit LacA	[G] Carbohydrate transport and metabolism	SP1193
SP1197	SP1197	spr1080	SPD_1057	6.75301	1.88738e-15	1.00438e-13	3.10438	1.35447e-13	4.50492e-12	4.69248	4.76119e-12	1.15967e-10	7.02399	0.000162031	0.00342033	1111	0.26	4.51823e-07	1.7682e-05				0.18	3.77e-05	0.000374885				PTS system, IIB component, putative	[G] Carbohydrate transport and metabolism	SP1197
SP1208	SP1208	spr1090	SPD_1068							0.379447	3.24784e-10	3.77074e-09				100										0.4	0.00248012	0.0346918	uridine kinase	[F] Nucleotide transport and metabolism	SP1208
SP1215	SP1215	spr1097	SPD_1075	7.57663	1.11022e-16	9.84682e-15	3.72927	5.01856e-11	8.38609e-10	6.78993	9.4702e-14	4.12309e-12	3.56792	6.48064e-06	0.000336896	1111							0.2	1.39e-06	2.71e-05				transporter, FNT family protein, putative	[P] Inorganic ion transport and metabolism	SP1215	CAGAAAACGCTTCCTA	-60	-25
SP1220	SP1220	spr1100	SPD_1078	0.251968	1.63325e-12	3.48729e-11	0.366366	1.86851e-13	5.82267e-12	0.222119	2.18381e-13	8.5463e-12	0.16197	2.56927e-07	3.89077e-05	1111													L-lactate dehydrogenase	[C] Energy production and conversion	SP1220	ACTAAAACGTTTACAT	-109	-52
SP1222	SP1222	spr1102	SPD_1080										2.2433	0.000153521	0.0033212	1000										0.39	0.00108569	0.0214855	type II restriction endonuclease, putative		SP1222
SP1229	SP1229	spr1109	SPD_1087							2.34935	5.84747e-09	4.14801e-08	1.69121	0.00026262	0.00497123	1100							0.32	6.81e-06	9.8e-05				formate--tetrahydrofolate ligase	[F] Nucleotide transport and metabolism	SP1229
SP1241	SP1241	spr1120	SPD_1098	0.479817	8.81295e-11	1.28084e-09							0.666237	0.00301751	0.0319453	1001													amino acid ABC transporter, amino acid-binding protein/permease protein	[E] Amino acid transport and metabolism	SP1241
SP1244	SP1244	spr1123	SPD_1101										0.493992	0.0012532	0.01739	1000							0.45	2.3e-05	0.000247518				signal recognition particle-docking protein FtsY	[U] Intracellular trafficking, secretion, and vesicular transport	SP1244
SP1249	SP1249	spr1128	SPD_1107	0.442785	2.9509e-09	2.67203e-08	0.507945	3.15078e-10	4.19175e-09							11							0.43	3.75e-05	0.000374393	0.27	8.34e-05	0.00518532	guanosine 5'-monophosphate oxidoreductase	[F] Nucleotide transport and metabolism	SP1249
SP1263	SP1263	spr1141	SPD_1120	0.5826	3.62224e-09	3.18003e-08	1.67263	3.52029e-10	4.59497e-09	0.418733	3.88845e-12	9.95842e-11	2.17181	0.00626345	0.0557943	1111				0.51	3.28e-07	2.04e-05	3.55	1.25e-05	0.000155693				DNA topoisomerase I	[L] Replication, recombination and repair	SP1263
SP1264	SP1264	spr1142	SPD_1121	0.513415	6.93818e-11	1.03001e-09	1.6937	1.32069e-10	2.00362e-09	0.592646	1.5517e-09	1.33776e-08	2.96173	0.0017018	0.021712	1111	2.13	9.48424e-08	5.00509e-06	0.59	5.18e-06	0.000168568				0.2	0.00127897	0.0233228	hypothetical protein SPD_1121	[S] Function unknown	SP1264
SP1267	SP1267	spr1145	SPD_1123	2.38035	4.73077e-11	7.20869e-10	1.60347	9.1989e-09	8.01486e-08	5.17038	1.87628e-13	7.51158e-12	2.64975	1.03703e-06	0.000103199	1111													CTP:phosphocholine cytidylyltransferase	[M] Cell wall/membrane/envelope biogenesis	SP1267
SP1268	SP1268	spr1146	SPD_1124	2.32321	2.54896e-11	4.08188e-10	1.56284	4.59589e-07	2.41232e-06	4.69215	1.24678e-13	5.23197e-12	2.50893	1.71178e-05	0.00066246	1111							0.26	3e-08	2.09e-06				protein LicB		SP1268
SP1269	SP1269	spr1147	SPD_1125	1.66275	9.28486e-07	3.9262e-06				3.9573	7.04529e-10	7.11268e-09	2.93644	1.01925e-05	0.000473337	1101													choline kinase	[M] Cell wall/membrane/envelope biogenesis	SP1269
SP1270	SP1270	spr1148	SPD_1126	1.91839	5.29787e-07	2.42078e-06				4.46112	1.42753e-10	1.8692e-09	2.16277	2.83027e-06	0.00020118	1101							0.31	1.72e-07	6.43e-06				alcohol dehydrogenase, zinc-containing	[E] Amino acid transport and metabolism	SP1270	TGCAACCGATTTAAA	downstream of start
SP1271	SP1271	spr1149	SPD_1127	2.15276	9.97127e-10	1.04201e-08	1.57841	3.5468e-09	3.49527e-08	2.80933	5.57529e-10	5.84902e-09	2.5019	0.000287285	0.00523881	1111													2-C-methyl-D-erythritol 4-phosphate cytidylyltransferase	[I] Lipid transport and metabolism	SP1271
SP1278	SP1278	spr1156	SPD_1134							0.308029	7.43876e-08	3.65949e-07	1.61587	0.00421242	0.0421605	1100	1.71	0.000232683	0.00203117				7.38	4.18e-10	9.7e-08				pyrimidine regulatory protein PyrR	[F] Nucleotide transport and metabolism	SP1278
SP1286	SP1286	spr1165	SPD_1141							0.389206	0.000147797	0.000359733				100							4.96	3.72e-09	4.62e-07				uracil-xanthine permease	[F] Nucleotide transport and metabolism	SP1286
SP1295	SP1295	spr1173	SPD_1150							0.433514	4.48824e-09	3.34744e-08				100							2.25	0.000338064	0.00228636				CrcB protein	[D] Cell cycle control, cell division, chromosome partitioning	SP1295
SP1296	SP1296	spr1174	SPD_1151							0.297691	1.19826e-12	3.66101e-11				100							13.43	4.39e-06	7.07e-05				hypothetical protein SPD_1151	[E] Amino acid transport and metabolism	SP1296
SP1297	SP1297	spr1175	SPD_1152				2.32396	2.85561e-12	6.58503e-11							10													flavodoxin	[C] Energy production and conversion	SP1297
SP1299	SP1299	spr1177	SPD_1154							0.276059	3.10452e-12	8.44768e-11				100													50S ribosomal protein L31 type B	[J] Translation, ribosomal structure and biogenesis	SP1299
SP1329	SP1329	spr1520	SPD_1489	2.07934	2.65977e-09	2.44684e-08										1													N-acetylneuraminate lyase, putative	[E] Amino acid transport and metabolism	SP1329
SP1340	SP1340	spr1201	SPD_1175	1.62003	3.42687e-08	2.21148e-07	0.52145	9.14624e-10	1.05456e-08	2.1805	1.07162e-10	1.49298e-09	0.497221	5.67858e-06	0.000313944	1111	0.5	7.20464e-08	4.11373e-06	1.57	2.74e-05	0.000560855	0.26	3.64e-08	2.35e-06				hypothetical protein SPD_1175		SP1340
SP1341	SP1341	spr1202	SPD_1176	1.60541	1.60523e-08	1.13548e-07	0.593945	9.34718e-09	8.12359e-08	2.22701	3.52018e-12	9.28849e-11	0.360854	0.000122908	0.00287309	1111	0.46	1.0273e-07	5.34044e-06				0.35	1.66e-06	3.13e-05	2.23	0.0042452	0.0506371	ABC transporter, ATP-binding protein	[V] Defense mechanisms	SP1341
SP1342	SP1342	spr1203	SPD_1177				0.627867	2.42814e-08	1.87476e-07	2.37577	7.9361e-12	1.65517e-10	0.268836	0.00581669	0.0534552	1110	0.45	6.15138e-07	2.25529e-05				0.26	9.09e-07	2e-05				drug efflux ABC transporter, ATP-binding/permease protein	[V] Defense mechanisms	SP1342
SP1343	SP1343	spr1204	SPD_1178	1.67309	5.2577e-09	4.31981e-08				1.84005	3.36582e-10	3.88184e-09	0.434136	0.000205021	0.00412767	1101	0.51	1.43229e-07	6.92868e-06				0.3	1.52e-07	5.94e-06				prolyl oligopeptidase family protein	[E] Amino acid transport and metabolism	SP1343
SP1353	SP1353	no_R6	SPD_1186				2.89128	5.02971e-10	6.32646e-09							10				0.33	7.68e-06	0.000234618							hypothetical protein SPD_1186		SP1353
SP1355	SP1355	spr1212	SPD_1188										2.15916	3.07412e-06	0.000205907	1000										0.45	0.000333379	0.0106528	50S ribosomal protein L10	[J] Translation, ribosomal structure and biogenesis	SP1355
SP1378	SP1378	spr1236	SPD_1212							0.449022	4.12586e-10	4.57656e-09				100										0.41	0.00176998	0.0286736	hypothetical protein SPD_1212	[R] General function prediction only	SP1378
SP1382	SP1382	spr1239	SPD_1215	0.376009	6.86906e-12	1.28433e-10	2.06463	1.92345e-09	2.05346e-08	0.399205	2.57235e-11	4.6183e-10	6.47033	0.00020984	0.00415269	1111	3.88	3.81747e-08	2.50873e-06	0.51	0.00024	0.00254146				0.13	0.00100295	0.0210438	cytoplasmic alpha-amylase	[G] Carbohydrate transport and metabolism	SP1382
SP1402	SP1402	spr1259	SPD_1233										0.375286	0.00637716	0.0563748	1000							0.14	1.94e-07	7.03e-06				NOL1/NOP2/sun family protein	[J] Translation, ribosomal structure and biogenesis	SP1402
SP1408	SP1408	spr1265	SPD_1239										0.490118	0.00931506	0.0729087	1000													acyl-ACP thioesterase, putative	[I] Lipid transport and metabolism	SP1408
SP1413	SP1413	spr1270	SPD_1244							0.360098	6.68288e-12	1.49208e-10				100													HPr kinase/phosphorylase	[T] Signal transduction mechanisms	SP1413	CTTGAAAAGGAAATCAATA	downstream of start
SP1414	SP1414	spr1271	SPD_1245	1.81478	1.42142e-06	5.73708e-06	3.1575	3.10418e-13	8.65917e-12							11				0.41	7.64e-07	3.97e-05							ribosomal protein S21		SP1414
SP1415	SP1415	spr1272	SPD_1246	3.89277	2.68875e-11	4.28589e-10	3.36315	6.53189e-11	1.0708e-09	2.25126	9.3469e-09	6.18921e-08	1.6979	2.51594e-05	0.000894186	1111													glucosamine-6-phosphate isomerase	[G] Carbohydrate transport and metabolism	SP1415	TTAAATCGTTTTCA	-66	-31	same box as SP1416: divergent gene pair
SP1416	SP1416	spr1273	SPD_1247	0.552369	4.73367e-11	7.18147e-10				0.476428	3.78816e-11	6.28293e-10				101										0.43	0.00119811	0.0229286	S-adenosylmethionine:tRNA ribosyltransferase-isomerase	[J] Translation, ribosomal structure and biogenesis	SP1416	TTAAATCGTTTTCA	-84	-42	same box as SP1415: divergent gene pair
SP1419	SP1419	spr1275	SPD_1249	1.96012	2.00947e-11	3.24802e-10				2.06838	9.11997e-11	1.31804e-09				101				1.65	2.12e-05	0.000467758	0.31	9.73e-06	0.000131318				acetyltransferase	[J] Translation, ribosomal structure and biogenesis	SP1419
SP1460	SP1460	spr1314	SPD_1289							2.83419	1.17387e-11	2.25889e-10				100													amino acid ABC transporter, ATP-binding protein	[E] Amino acid transport and metabolism	SP1460
SP1461	SP1461	spr1315	SPD_1290							2.37849	6.1892e-10	6.41577e-09				100													amino acid ABC transporter, permease protein	[E] Amino acid transport and metabolism	SP1461
SP1466	SP1466	spr1320	SPD_1295	1.76638	5.98446e-08	3.56287e-07				2.22565	1.48297e-09	1.29453e-08				101													hemolysin	[R] General function prediction only	SP1466
SP1470	SP1470	spr1324	SPD_1300	4.37057	4.44089e-15	2.02119e-13	2.46632	3.52807e-12	7.92441e-11	3.0806	2.35478e-13	9.11301e-12	2.81711	0.000757073	0.0118779	1111							0.43	0.000777014	0.00436506	0.52	0.00703435	0.0706071	thiamine biosynthesis protein ApbE, putative	[H] Coenzyme transport and metabolism	SP1470	ATGTAAGGGCTTCAAT	-63	28
SP1471	SP1471	spr1325	SPD_1301	4.80062	9.54792e-15	3.88544e-13	1.90099	3.29312e-09	3.26387e-08	3.09373	4.26248e-12	1.07581e-10	2.61887	0.0520405	0.243953	1111													NADPH-dependent FMN reductase	[R] General function prediction only	SP1471
SP1472	SP1472	spr1326	SPD_1302	6.24754	1.33227e-15	7.43277e-14	2.6068	1.04438e-11	2.00694e-10	4.12761	4.88498e-15	3.86691e-13	8.65371	0.000123949	0.00285903	1111				2.04	2.84e-07	1.98e-05							oxidoreductase, putative	[R] General function prediction only	SP1472
SP1480	SP1480	spr1334	SPD_1310							0.419844	4.91096e-12	1.17157e-10				100							2.75	0.000379397	0.00246998				hypothetical protein SPD_1310		SP1480
SP1491	SP1491	spr1344	SPD_1320	2.58444	2.4435e-09	2.28434e-08	1.92777	1.02215e-09	1.16687e-08	2.4486	3.05338e-11	5.34418e-10	1.65832	0.000206275	0.00412905	1111													glycerol uptake facilitator protein, putative	[G] Carbohydrate transport and metabolism	SP1491	ATAAAAACGCTTACAA	-132	-89
SP1500	SP1500	spr1353	SPD_1328							1.71778	2.53609e-07	1.0681e-06	2.32966	2.61249e-05	0.00090993	1100													amino acid ABC transporter, amino acid-binding protein	[E] Amino acid transport and metabolism	SP1500
SP1501	SP1501	spr1354	SPD_1329							1.73538	1.66918e-09	1.41111e-08	2.34938	1.70729e-05	0.000668144	1100													amino acid ABC transporter, ATP-binding protein	[E] Amino acid transport and metabolism	SP1501
SP1502	SP1502	spr1355	SPD_1330										2.92817	3.90343e-05	0.00125885	1000													amino acid ABC transporter, permease protein	[E] Amino acid transport and metabolism	SP1502
SP1504	SP1504	spr1356	SPD_1331	1.66764	5.86624e-10	6.58809e-09				2.29184	8.90402e-11	1.30305e-09				101							0.33	1.23e-06	2.45e-05				TPR domain-containing protein		SP1504
SP1507	SP1507	spr1359	SPD_1334							1.55373	1.41773e-07	6.33885e-07	0.170945	1.73502e-05	0.000664074	1100							0.46	0.000283948	0.00198195	3.51	0.0047997	0.0549913	F0F1 ATP synthase subunit epsilon	[C] Energy production and conversion	SP1507
SP1508	SP1508	spr1360	SPD_1335	0.471111	4.5136e-11	6.93891e-10	0.449051	2.29478e-10	3.22669e-09				0.49215	2.69394e-05	0.000929009	1011													F0F1 ATP synthase subunit beta	[C] Energy production and conversion	SP1508
SP1509	SP1509	spr1361	SPD_1336	0.511125	9.33544e-11	1.3511e-09	0.504035	4.93075e-11	8.27934e-10				0.366935	5.34296e-06	0.000300154	1011													F0F1 ATP synthase subunit gamma	[C] Energy production and conversion	SP1509
SP1511	SP1511	spr1363	SPD_1338	0.503552	1.40807e-11	2.37587e-10	0.483832	4.719e-12	1.00759e-10				0.133606	0.0119494	0.0874365	1011													F0F1 ATP synthase subunit delta	[C] Energy production and conversion	SP1511
SP1512	SP1512	spr1364	SPD_1339	0.53584	1.31269e-10	1.80182e-09	0.464548	1.65745e-12	3.9268e-11				0.373537	0.0010966	0.0160482	1011													F0F1 ATP synthase subunit B	[C] Energy production and conversion	SP1512
SP1514	SP1514	spr1366	SPD_1341	0.628007	2.80385e-08	1.85796e-07	0.453292	9.83795e-11	1.5398e-09							11	0.2	5.34887e-05	0.000660643	0.31	0.000619673	0.00514							F0F1 ATP synthase subunit C	[C] Energy production and conversion	SP1514	TATTAAACGCTTCCAA	-85	-44
SP1517	SP1517	spr1369	SPD_1345				2.50853	2.89324e-13	8.20305e-12	1.6987	2.5284e-08	1.4273e-07				110													transcription elongation factor GreA	[K] Transcription	SP1517
SP1524	SP1524	spr1376	SPD_1352	1.69277	1.4208e-06	5.7413e-06				2.11932	5.44532e-10	5.78234e-09	1.87577	0.00607541	0.0549628	1101													aminotransferase, class II	[E] Amino acid transport and metabolism	SP1524
SP1531	SP1531	spr1385	SPD_1360	2.69106	1.24333e-07	6.7941e-07	3.4413	1.03917e-13	3.5589e-12							11				0.41	2.99e-05	0.000585785							hypothetical protein SPD_1360		SP1531	TATGTAACCGGTAACACAT	-38	15
SP1538	SP1538	spr1393	SPD_1367							0.498813	1.18707e-10	1.62778e-09				100													Cof family protein/peptidyl-prolyl cis-trans isomerase, cyclophilin type	[O] Posttranslational modification, protein turnover, chaperones	SP1538	TTAATTCGCTTTCT	-244	no clear promoter
SP1539	SP1539	spr1394	SPD_1368							0.334192	1.34321e-10	1.77886e-09				100				0.56	2.09e-06	8.78e-05				0.46	0.00200844	0.0298949	30S ribosomal protein S18	[J] Translation, ribosomal structure and biogenesis	SP1539
SP1540	SP1540	spr1395	SPD_1369							0.320585	2.31054e-09	1.86719e-08				100							2.05	9.31e-06	0.000127157	0.5	0.00147722	0.0249765	single-strand DNA-binding protein	[L] Replication, recombination and repair	SP1540
SP1541	SP1541	spr1396	SPD_1370							0.312365	2.60558e-10	3.11863e-09				100	0.62	0.000196578	0.0017692	0.53	1.1e-05	0.000297688	2.89	0.000131187	0.00105282	0.26	0.00250631	0.0347789	30S ribosomal protein S6	[J] Translation, ribosomal structure and biogenesis	SP1541
SP1571	SP1571	spr1429	SPD_1401							0.324138	4.84091e-12	1.17089e-10				100							2.36	6.69e-06	9.76e-05				dihydrofolate reductase	[H] Coenzyme transport and metabolism	SP1571	TTTGTAAGCTATTCCAAAC	-67	-32	no clear promoter
SP1578	SP1578	spr1436	SPD_1408	2.42919	9.30678e-12	1.67667e-10	1.9328	1.64261e-09	1.77556e-08	1.89708	1.66574e-09	1.41162e-08				111				1.88	7.24e-07	3.88e-05	0.41	0.000405685	0.00260701				hypothetical protein SPD_1408	[H] Coenzyme transport and metabolism	SP1578
SP1580	SP1580	spr1437	SPD_1409	6.12691	1.88738e-15	1.02007e-13	5.88503	4.44089e-16	3.41357e-14	4.05077	5.27356e-14	2.58701e-12	6.86122	1.3617e-08	6.77542e-06	1111							0.43	0.000277183	0.00194251				sugar ABC transporter, ATP-binding protein	[G] Carbohydrate transport and metabolism	SP1580	TATAAAGCGTTTTCAT	-47	-9
SP1586	SP1586	spr1440	SPD_1413	0.453063	7.49645e-12	1.37927e-10				0.487847	9.47149e-11	1.35758e-09				101													ATP-dependent RNA helicase, putative	[J] Translation, ribosomal structure and biogenesis	SP1586
SP1588	SP1588	spr1442	SPD_1415										2.29552	1.3925e-05	0.000591474	1000	0	3.59743e-09	5.22077e-07	0	7.23e-09	9.68e-07	2.14	0.000336962	0.00228334				pyridine nucleotide-disulfide oxidoreductase	[C] Energy production and conversion	SP1588	AGAAAGCGTTTTCA	-102	-57
SP1626	SP1626	spr1467	SPD_1439				2.45736	3.74447e-09	3.60784e-08				1.89035	0.0125528	0.0905207	1010				0.3	1.12e-08	1.44e-06							30S ribosomal protein S15	[J] Translation, ribosomal structure and biogenesis	SP1626
SP1644	SP1644	spr1486	SPD_1457										0.417989	0.00083603	0.0128845	1000										3.3	0.00125286	0.0234609	D-tyrosyl-tRNA deacylase	[J] Translation, ribosomal structure and biogenesis	SP1644
SP1651	SP1651	spr1495	SPD_1464	2.24419	4.9345e-11	7.45346e-10							0.394957	0.000348538	0.00625752	1001	0.47	1.21493e-06	3.77821e-05										thiol peroxidase	[O] Posttranslational modification, protein turnover, chaperones	SP1651
SP1654	SP1654	spr1498	SPD_1467							0.497402	3.74928e-11	6.27824e-10				100													hypothetical protein SPD_1467		SP1654
SP1655	SP1655	spr1499	SPD_1468				2.16528	4.55025e-12	9.77597e-11	0.564614	6.22578e-07	2.35189e-06				110													phosphoglyceromutase	[G] Carbohydrate transport and metabolism	SP1655
SP1659	SP1659	spr1502	SPD_1472	1.63435	1.21166e-08	8.82344e-08	0.55732	8.58407e-11	1.37464e-09	2.17242	5.42485e-10	5.77821e-09	0.65843	0.0013465	0.0183198	1111	0.56	2.09359e-06	5.78727e-05	1.66	8.11e-06	0.000241395	0.19	8.95e-08	4.16e-06				isoleucyl-tRNA synthetase	[J] Translation, ribosomal structure and biogenesis	SP1659
SP1670	SP1670	spr1514	SPD_1483	0.650743	5.12138e-08	3.12431e-07				0.468662	8.71965e-09	5.86304e-08				101													UDP-N-acetylmuramoylalanyl-D-glutamyl-2, 6-diaminopimelate--D-alanyl-D-alanyl ligase	[M] Cell wall/membrane/envelope biogenesis	SP1670
SP1672	SP1672	spr1516	SPD_1485										0.426385	4.60883e-05	0.00144618	1000							0.34	2.64e-06	4.53e-05				recombination protein RecR	[L] Replication, recombination and repair	SP1672
SP1675	SP1675	spr1519	SPD_1488	13.7697	4.21885e-15	1.97203e-13	10.0174	1.11022e-16	1.0106e-14	10.0908	2.22045e-16	4.07043e-14	26.8274	0.000201139	0.00407307	1111										2.35	0.000203733	0.00806366	ROK family protein	[G] Carbohydrate transport and metabolism	SP1675	ATTGAAAATGATGTCAACT	downstream of start
SP1676	SP1676	spr1186	SPD_1163	9.85907	0	0	5.29286	4.44089e-16	3.49115e-14	7.67397	4.44089e-16	6.72506e-14	10.1503	0.000679119	0.0108503	1111													N-acetylneuraminate lyase, putative	[E] Amino acid transport and metabolism	SP1676
SP1677	SP1677	spr1522	SPD_1490	11.9067	0	0	6.49165	1.44329e-15	8.75849e-14	8.33274	1.11022e-16	2.57794e-14	27.6239	9.2093e-05	0.00235853	1111													hypothetical protein SPD_1490		SP1677
SP1679	SP1679	spr1523	SPD_1491	15.455	1.11022e-16	9.14348e-15	6.33436	7.77156e-16	5.48609e-14	8.1444	1.9651e-14	1.18007e-12	7.20403	0.021917	0.134871	1111													hypothetical protein SPD_1491		SP1679
SP1680	SP1680	spr1524	SPD_1492	11.8141	0	0	5.51874	4.88498e-15	2.52196e-13	6.66948	3.07088e-13	1.15009e-11	7.03043	0.0145917	0.10104	1111													hypothetical protein SPD_1492	[G] Carbohydrate transport and metabolism	SP1680
SP1681	SP1681	spr1525	SPD_1493	12.9203	9.99201e-16	5.85803e-14	1.64219	3.09042e-07	1.7049e-06	10.5226	4.55191e-15	3.68705e-13	11.4653	4.163e-06	0.000268514	1111													sugar ABC transporter, permease protein	[G] Carbohydrate transport and metabolism	SP1681
SP1682	SP1682	spr1526	SPD_1494	11.9183	1.24789e-13	3.62727e-12	11.9243	1.66534e-15	9.93171e-14	9.19643	9.861e-13	3.09422e-11	10.3732	2.40467e-07	3.80703e-05	1111							0.4	0.00084166	0.0046458				sugar ABC transporter, permease protein	[G] Carbohydrate transport and metabolism	SP1682
SP1683	SP1683	spr1527	SPD_1495	17.9432	8.88178e-16	5.38984e-14	16.6119	7.77156e-16	5.37637e-14	9.09511	4.44089e-16	6.44484e-14	7.72528	1.2618e-09	2.19742e-06	1111							0.49	0.000559307	0.00335296				sugar ABC transporter, sugar-binding protein	[G] Carbohydrate transport and metabolism	SP1683	ATGAAATCGCATACAA	-63	no promoter
SP1684	SP1684	spr1528	SPD_1496	20.7131	0	0	12.4056	0	0	13.3847	9.99201e-16	1.20007e-13	20.4124	1.50399e-08	6.54801e-06	1111							0.4	0.000637669	0.00370785				PTS system, IIBC components	[G] Carbohydrate transport and metabolism	SP1684	TGTAATCGATTTCA	downstream of start
SP1685	SP1685	spr1529	SPD_1497	8.39258	2.22045e-16	1.66968e-14	5.53839	1.85407e-14	7.91757e-13	5.10317	5.86198e-14	2.79689e-12	15.3315	1.29198e-07	2.49998e-05	1111													N-acetylmannosamine-6-phosphate 2-epimerase	[G] Carbohydrate transport and metabolism	SP1685	TTGAAAGCGTTTTAAT	-52	-15
SP1686	SP1686	spr1530	SPD_1498	2.7521	3.37874e-12	6.71671e-11	2.38919	3.58118e-09	3.51912e-08	1.93607	9.03892e-08	4.34842e-07				111													putative oxidoreductase	[R] General function prediction only	SP1686
SP1687	SP1687	spr1531	SPD_1499	3.22534	2.65676e-13	6.85802e-12	2.24584	1.05436e-08	9.02732e-08	1.97367	1.33405e-09	1.17336e-08				111													sialidase B precursor	[G] Carbohydrate transport and metabolism	SP1687
SP1688	SP1688	spr1532	SPD_1500	3.59876	1.97398e-13	5.29301e-12	2.39155	4.8882e-09	4.58219e-08	2.23341	3.58787e-10	4.08384e-09				111													ABC transporter, permease protein	[G] Carbohydrate transport and metabolism	SP1688
SP1689	SP1689	spr1533	SPD_1501	3.43538	3.75588e-13	9.27972e-12	2.16381	3.08945e-09	3.13384e-08	1.89052	3.06199e-09	2.35949e-08				111													ABC transporter, permease protein	[G] Carbohydrate transport and metabolism	SP1689
SP1690	SP1690	spr1534	SPD_1502	2.35509	1.08223e-11	1.89063e-10	1.52983	4.88197e-06	1.95675e-05	1.63343	3.08534e-08	1.6791e-07				111													ABC transporter, substrate-binding protein	[G] Carbohydrate transport and metabolism	SP1690	ATTGAAACCTCAAACATTC	downstream of start
SP1691	SP1691	spr1535	SPD_1503	2.13208	7.76697e-10	8.47507e-09				1.56629	8.12044e-08	3.95021e-07				101													hypothetical protein SPD_1503	[G] Carbohydrate transport and metabolism	SP1691	AATGTAAGCGTTACCCAAG	downstream of start
SP1694	SP1694	spr1537	SPD_1505	4.1517	1.37113e-13	3.9196e-12	2.52629	3.10354e-09	3.13893e-08	2.42356	2.31786e-09	1.86446e-08				111													hypothetical protein SPD_1505		SP1694	ATTGAAAGCGTTTTAAAAA	-156	-15
SP1704	SP1704	spr1546	SPD_1514	2.69457	1.41476e-12	3.11697e-11				2.30351	5.25147e-12	1.21939e-10				101	0.42	1.32931e-06	4.09732e-05	1.53	6.17e-05	0.000938443	0.27	1.37e-05	0.000165544				ABC transporter, ATP-binding protein	[V] Defense mechanisms	SP1704
SP1705	SP1705	spr1547	SPD_1515	2.13928	8.60112e-12	1.56586e-10				2.07243	2.78381e-11	4.94694e-10	0.603228	0.036431	0.191386	1101	0.46	6.2372e-06	0.000128545	1.65	0.000158554	0.00189125	0.21	3.82e-07	1.06e-05				hypothetical protein SPD_1515		SP1705	TGTTATCTTTTTCAA	downstream of start
SP1706	SP1706	spr1548	SPD_1516	2.28794	2.38043e-12	4.81515e-11				2.16726	7.88658e-11	1.17389e-09				101	0.48	7.20524e-06	0.0001402	1.51	0.000394595	0.00374489	0.21	4.46e-07	1.14e-05				hypothetical protein SPD_1516		SP1706
SP1707	SP1707	spr1551	no_SPD	5.50491	2.44249e-15	1.24244e-13	3.53653	3.82472e-13	1.05838e-11	5.8029	2.17604e-14	1.24248e-12				111													hypothetical protein		SP1707
SP1708	SP1708	spr1552	no_SPD	4.96585	1.66534e-15	9.14348e-14	3.76444	1.88294e-13	5.81525e-12	4.86779	2.15383e-14	1.27149e-12	3.76899	0.00153121	0.0200497	1111													hypothetical protein		SP1708	TTTGATAGCGTTTTCTATT			pseudogene
SP1713	SP1713	spr1557	SPD_1523							0.477718	1.29616e-09	1.14874e-08				100													transcriptional regulator NrdR	[K] Transcription	SP1713
SP1715	SP1715	spr1559	SPD_1525							2.22522	5.00805e-09	3.67222e-08				100													ABC transporter, ATP-binding protein	[V] Defense mechanisms	SP1715	TAAAAATGTTAACAA	downstream of start
SP1716	SP1716	spr1561	SPD_1527	2.44873	3.76621e-12	7.40189e-11				2.51022	3.24907e-12	8.705e-11				101	0.56	2.97586e-06	7.56564e-05				0.37	2.18e-06	3.9e-05	1.8	0.00250802	0.0346644	hypothetical protein SPD_1527	[C] Energy production and conversion	SP1716
SP1717	SP1717	spr1562	SPD_1528	2.42004	7.07257e-12	1.31527e-10										1													ABC transporter, ATP-binding protein	[R] General function prediction only	SP1717	ATTGTAAAGGCTATCAAAA	-47	-14
SP1731	SP1731	spr1576	SPD_1541							0.49332	3.86438e-09	2.92601e-08	0.498003	0.0616832	0.275086	1100													hypothetical protein SPD_1541	[S] Function unknown	SP1731
SP1775	SP1775	spr1601	SPD_1566							0.372821	1.99226e-08	1.17016e-07				100							2.66	5.05e-05	0.000468985				hypothetical protein SPD_1566		SP1775
SP1778	SP1778	spr1604	SPD_1569	1.52987	3.21229e-08	2.08468e-07	2.17565	1.04909e-07	6.51493e-07	1.81661	2.63194e-08	1.46673e-07				111				0.55	0.000252456	0.00264055	0.22	4.34e-08	2.48e-06	0.47	8.61e-05	0.00516974	aquaporin	[G] Carbohydrate transport and metabolism	SP1778
SP1779	SP1779	spr1605	SPD_1570										0.46927	0.00142548	0.0191697	1000													hypothetical protein SPD_1570		SP1779
SP1787	SP1787	spr1613	no_SPD				1.89065	1.49576e-08	1.22603e-07	0.464605	2.27896e-09	1.84596e-08				110				0.34	1.67e-07	1.45e-05	3.92	6.64e-06	9.76e-05				hypothetical protein		SP1787
SP1795	SP1795	spr1617	SPD_1582	1.89783	2.64508e-08	1.76288e-07	1.89086	1.44579e-08	1.18789e-07	4.04992	8.05911e-13	2.59906e-11				111													sucrose-6-phosphate hydrolase, putative	[G] Carbohydrate transport and metabolism	SP1795
SP1802	SP1802	spr1623	SPD_1588	2.4174	1.58576e-10	2.11782e-09	1.97421	2.37812e-08	1.84437e-07	3.2751	9.7502e-12	1.94057e-10				111										2.01	0.00133154	0.0235418	hypothetical protein SPD_1588		SP1802
SP1803	SP1803	spr1624	SPD_1589	1.91825	2.59555e-08	1.7332e-07	1.55327	1.88865e-06	8.3862e-06	2.09668	3.57256e-09	2.71686e-08				111													hypothetical protein SPD_1589	[S] Function unknown	SP1803
SP1804	SP1804	spr1625	SPD_1590	2.68549	3.67029e-12	7.25458e-11	1.87732	7.25459e-10	8.59371e-09	4.06187	1.08746e-12	3.38182e-11				111							0.41	4.14e-05	0.000403183	2.45	0.000436998	0.0124759	general stress protein 24, putative	[S] Function unknown	SP1804
SP1805	SP1805	spr1626	SPD_1591	2.39406	7.41729e-12	1.372e-10				2.54328	1.34923e-10	1.77334e-09				101													hypothetical protein SPD_1591		SP1805
SP1810	SP1810	spr1630	SPD_1595							0.353145	3.20669e-09	2.46011e-08				100							4.29	1.15e-06	2.36e-05				hypothetical protein SPD_1595		SP1810
SP1811	SP1811	spr1631	SPD_1596	2.16752	1.47227e-06	5.89419e-06	1.77428	2.35603e-05	8.02117e-05				1.55237	0.00244338	0.0275414	1011													tryptophan synthase subunit alpha	[E] Amino acid transport and metabolism	SP1811
SP1812	SP1812	spr1632	SPD_1597	2.27457	2.7619e-09	2.53406e-08	1.6478	2.30377e-07	1.30849e-06	2.77492	4.91374e-12	1.16425e-10				111													tryptophan synthase subunit beta	[E] Amino acid transport and metabolism	SP1812
SP1813	SP1813	spr1633	SPD_1598	2.24208	1.27389e-09	1.28466e-08	1.59904	1.89448e-07	1.0995e-06	2.49962	9.43867e-12	1.90028e-10				111													N-(5'-phosphoribosyl)anthranilate isomerase	[E] Amino acid transport and metabolism	SP1813
SP1815	SP1815	spr1635	SPD_1600	2.1676	1.15588e-08	8.47072e-08				2.20222	1.80828e-11	3.33239e-10				101													anthranilate phosphoribosyltransferase	[E] Amino acid transport and metabolism	SP1815
SP1816	SP1816	spr1636	SPD_1601	1.93297	1.15848e-08	8.47187e-08				2.08129	4.66661e-11	7.52491e-10	2.5159	0.0368894	0.192922	1101													anthranilate synthase component II	[E] Amino acid transport and metabolism	SP1816
SP1823	SP1823	spr1641	SPD_1606	4.40235	1.55143e-12	3.37508e-11	4.92324	8.64531e-13	2.13601e-11	3.3694	2.16494e-14	1.25674e-12	2.34916	0.0652037	0.284949	1111	2.2	0.000345093	0.00276949										MgtC/SapB family protein	[S] Function unknown	SP1823
SP1824	SP1824	spr1643	SPD_1607	2.94388	9.00391e-14	2.73198e-12	3.00019	1.23069e-11	2.28869e-10	2.37381	7.47269e-11	1.12673e-09	2.31672	0.0724671	0.305203	1111	3.01	8.1637e-06	0.000152872	1.82	1.69e-06	7.44e-05							ABC transporter, permease protein	[P] Inorganic ion transport and metabolism	SP1824
SP1825	SP1825	spr1644	SPD_1608	2.57901	2.80109e-13	7.12425e-12	3.14969	5.73178e-11	9.53184e-10	2.07976	1.45471e-10	1.89058e-09				111	2.81	1.77292e-05	0.000273234	1.65	1.22e-05	0.000316081							ABC transporter ATP-binding protein	[E] Amino acid transport and metabolism	SP1825
SP1826	SP1826	spr1645	SPD_1609	2.03559	8.17598e-11	1.19328e-09	4.47202	2.25597e-13	6.72708e-12	1.99633	5.60736e-09	4.0269e-08				111	3.25	8.18588e-06	0.000152468										ABC transporter, substrate-binding protein	[P] Inorganic ion transport and metabolism	SP1826
SP1827	SP1827	spr1646	SPD_1610	1.66058	5.32165e-08	3.22374e-07	2.88526	1.02794e-09	1.16578e-08							11	3.37	4.65005e-07	1.79957e-05										hypothetical protein SPD_1610	[S] Function unknown	SP1827	ATGAAACCGTTTCCTT	-63	-10
SP1851	SP1851	spr1666	SPD_1632	1.88291	3.73606e-09	3.25517e-08							2.22903	1.4676e-05	0.000608531	1001							0.01	3.6e-05	0.000361659	0	3e-05	0.00316263	hypothetical protein SPD_1632	[Q] Secondary metabolites biosynthesis, transport and catabolism	SP1851
SP1852	SP1852	spr1667	SPD_1633	4.53081	6.32827e-15	2.73619e-13	3.5561	1.04861e-11	2.00394e-10	4.30198	3.13083e-14	1.65222e-12	2.34963	6.46939e-07	8.04746e-05	1111	0.04	8.65086e-13	6.02619e-10	0.09	3.71e-13	2.16e-10	0.01	3.55e-10	8.83e-08	0.09	3.79e-08	0.000132163	galactose-1-phosphate uridylyltransferase	[G] Carbohydrate transport and metabolism	SP1852
SP1853	SP1853	spr1668	SPD_1634	3.31116	8.4488e-14	2.60932e-12	4.81357	4.6263e-13	1.25019e-11	2.91064	1.1916e-12	3.67288e-11	3.5362	1.10545e-05	0.000487378	1111	0.04	1.2661e-12	7.3497e-10	0.07	6.61e-14	1.15e-10	0.02	5.25e-11	3.65e-08	0.08	6.76e-06	0.00156961	galactokinase	[G] Carbohydrate transport and metabolism	SP1853	GTGTAATCGTTTTCTT	-46	no clear promoter
SP1855	SP1855	spr1670	SPD_1636				2.22726	9.78706e-12	1.89125e-10							10													alcohol dehydrogenase, zinc-containing	[E] Amino acid transport and metabolism	SP1855
SP1857	SP1857	spr1672	SPD_1638				4.18442	2.27152e-13	6.71553e-12	0.561962	1.50923e-06	5.22012e-06				110	4.02	2.30326e-07	9.66535e-06	0.53	6.71e-06	0.000208519							cation efflux system protein	[P] Inorganic ion transport and metabolism	SP1857
SP1858	SP1858	spr1673	SPD_1639							0.438332	6.79823e-12	1.49862e-10				100										0.14	0.00015235	0.00663295	transcriptional regulator, TetR family protein	[K] Transcription	SP1858
SP1860	SP1860	spr1677	SPD_1642							2.07381	2.19866e-10	2.71558e-09	0.495175	0.00329078	0.0341125	1100							0.5	5.13e-05	0.000474983				choline transporter (glycine betaine transport system permease protein)	[E] Amino acid transport and metabolism	SP1860
SP1865	SP1865	spr1682	SPD_1647										0.418432	0.00428562	0.0427702	1000										2.35	0.00800643	0.076822	glutamyl aminopeptidase PepA	[G] Carbohydrate transport and metabolism	SP1865
SP1882	SP1882	spr1697	SPD_1662							0.484687	8.91577e-11	1.29931e-09				100													hypothetical protein SPD_1662	[S] Function unknown	SP1882
SP1899	SP1899	spr1714	SPD_1679	3.52673	6.21725e-15	2.72221e-13	2.88912	4.44222e-12	9.7251e-11	1.87079	6.22059e-09	4.39479e-08	1.77083	0.067829	0.292749	1111													msm operon regulatory protein MsmR	[K] Transcription	SP1899	CTGAAATCGCTTTCCA	-60	-35
SP1900	SP1900	spr1715	SPD_1680	3.74858	3.44169e-15	1.67673e-13	2.74232	3.7831e-11	6.54286e-10	2.06228	1.24691e-10	1.69648e-09				111													biotin--protein ligase	[H] Coenzyme transport and metabolism	SP1900
SP1907	SP1907	spr1723	SPD_1710	0.514369	1.77421e-11	2.92238e-10				0.313906	1.00919e-13	4.33953e-12				101							2.83	1.1e-05	0.000144099				co-chaperonin GroES	[O] Posttranslational modification, protein turnover, chaperones	SP1907
SP1912	SP1912	spr1728	SPD_1715	0.583768	2.41789e-09	2.26653e-08				0.428964	3.21517e-10	3.74529e-09				101							3.77	0.000616399	0.00362044				hypothetical protein SPD_1715		SP1912
SP1914	SP1914	spr1730	SPD_1717	1.64855	2.04697e-07	1.03819e-06	4.14806	1.47549e-13	4.86067e-12	2.37976	5.20732e-11	8.24414e-10	4.69551	3.23083e-07	4.50119e-05	1111													hypothetical protein SPD_1717		SP1914
SP1915	SP1915	spr1731	SPD_1718				3.5444	2.57905e-13	7.49658e-12				5.02473	0.00026461	0.00495503	1010													hypothetical protein SPD_1718	[K] Transcription	SP1915
SP1916	SP1916	spr1732	SPD_1719	1.64538	8.52345e-09	6.5227e-08	2.16144	4.44789e-09	4.20362e-08				1.85234	0.0404386	0.20472	1011													PAP2 family protein		SP1916
SP1946	SP1946	spr1763	SPD_1745	2.92643	3.757e-13	9.21663e-12				2.13923	2.90693e-10	3.43215e-09				101				2.82	1.43e-07	1.31e-05							transcriptional regulator PlcR, putative		SP1946
SP1947	SP1947	spr1764	SPD_1746	12.7993	5.23026e-13	1.26514e-11	2.23216	1.15737e-08	9.78813e-08	5.73271	2.27518e-12	6.49545e-11				111				3.68	6.89e-06	0.000212513							hypothetical protein SPD_1746		SP1947	AAGAAAGGGGTTTCAT	-11	27
SP1950	SP1950	spr1767	SPD_1749	9.94911	0.000645141	0.00133226				16.54	0	0	10.0133	0.0131935	0.0939735	1101										5.82	0.000135761	0.00665993	bacteriocin formation protein, putative	[V] Defense mechanisms	SP1950
SP1951	SP1951	spr1768	SPD_1750	49.7289	0	0	2.52915	1.12219e-08	9.51382e-08	21.5468	3.33067e-16	5.52415e-14	12.8259	0.0409009	0.205567	1111	0.49	0.000312058	0.00255741	10.88	3.49e-13	2.43e-10				6.38	1.3e-05	0.00196456	hypothetical protein SPD_1750	[R] General function prediction only	SP1951
SP1952	SP1952	spr1769	SPD_1751	43.0744	4.44089e-16	3.01197e-14	2.03067	9.02091e-08	5.69403e-07	19.2247	1.11022e-15	1.28897e-13				111	0.5	0.000742668	0.0051222	11.51	5.7e-14	1.98e-10				4.83	6.01e-05	0.00435783	hypothetical protein SPD_1751		SP1952
SP1953	SP1953	spr1770	SPD_1752	42.8381	0	0	2.1236	1.05806e-06	4.99976e-06	17.1937	0	0	11.1567	0.0265866	0.152555	1111	0.49	0.000189131	0.00171996	10.15	5.7e-13	1.98e-10							toxin secretion ABC transporter, ATP-binding/permease protein	[V] Defense mechanisms	SP1953	TGAAATCGGTACCAC	downstream of start
SP1956	SP1956	spr1772	SPD_1754	20.0733	0	0	1.84848	1.09321e-07	6.77675e-07	9.69339	1.11022e-16	2.76208e-14	4.81401	0.000117806	0.00277242	1111	0.56	0.000821564	0.00555632	6.45	6.54e-13	2.07e-10	0.47	0.000594283	0.00350828	3	5.66e-05	0.004198	hypothetical protein SPD_1754	[S] Function unknown	SP1956
SP1957	SP1957	spr1773	SPD_1755	17.6381	0	0	1.86882	5.42277e-09	5.02878e-08	11.1317	8.88178e-16	1.10483e-13	4.75669	0.00258755	0.028341	1111	0.5	0.000118879	0.00118641	4.94	1.89e-11	4.39e-09				3.31	0.000100039	0.00561993	ABC transporter, ATP-binding protein	[V] Defense mechanisms	SP1957
SP1958	SP1958	spr1774	SPD_1756	5.06272	6.26946e-11	9.34745e-10				2.15544	9.31459e-10	8.88841e-09	2.26065	0.0303927	0.167232	1101				6.03	3.38e-07	2.07e-05							hypothetical protein SPD_1756		SP1958
SP1960	SP1960	spr1776	SPD_1758										0.476945	1.39922e-06	0.000118866	1000				101.59	0.000537015	0.00472329	0.57	8.02e-05	0.000688291				DNA-directed RNA polymerase subunit beta'	[K] Transcription	SP1960
SP1961	SP1961	spr1777	SPD_1759				0.63247	1.3289e-09	1.47803e-08				0.434592	0.000687182	0.010929	1010													DNA-directed RNA polymerase subunit beta	[K] Transcription	SP1961
SP1976	SP1976	spr1791	SPD_1774	3.84755	8.9373e-14	2.73576e-12	2.81578	6.86118e-14	2.47217e-12	3.16288	4.21219e-13	1.56075e-11	1.86985	5.69583e-06	0.000309978	1111	0.57615	6.94331e-05	0.000808814				0.506783	0.000147373	0.00115869				pyruvate formate-lyase activating enzyme	[O] Posttranslational modification, protein turnover, chaperones	SP1976	TATAAAACGTTTTCAA	-21	18
SP1980	SP1980	spr1794	SPD_1777										0.386854	0.000226197	0.00442608	1000													cmp-binding-factor 1	[R] General function prediction only	SP1980
SP1981	SP1981	spr1795	SPD_1778										0.323973	0.00159414	0.0206409	1000													hypothetical protein SPD_1778	[S] Function unknown	SP1981
SP1982	SP1982	spr1796	SPD_1779										0.372371	0.000405377	0.00709512	1000							0.47	0.000380497	0.00246792				hypothetical protein SPD_1779	[H] Coenzyme transport and metabolism	SP1982
SP1984	SP1984	spr1798	SPD_1781										0.480544	0.00629159	0.0559021	1000													ribosome-associated GTPase	[R] General function prediction only	SP1984
SP1992	SP1992	spr1806	SPD_1789	0.356143	1.41776e-12	3.10381e-11	1.7238	7.057e-09	6.37341e-08	0.182413	2.60458e-13	9.86061e-12				111	4.22	5.23141e-09	6.2831e-07				36.44	1.99e-05	0.000219721				cell wall surface anchor family protein		SP1992
SP1996	SP1996	spr1810	SPD_1793	7.82941	3.55271e-14	1.26689e-12	7.12289	4.44089e-16	3.57234e-14	2.98889	5.40535e-09	3.93045e-08	5.04719	0.00123015	0.0173466	1111													universal stress protein family protein	[T] Signal transduction mechanisms	SP1996	AGTGAAAAGGTTTACAATT	-39	-3
SP1999	SP1999	spr1813	SPD_1797	0.325138	3.49011e-09	3.10342e-08	0.371621	9.03918e-11	1.43424e-09	0.221798	3.9635e-14	2.0007e-12	0.149295	0.00209691	0.024591	1111													catabolite control protein A	[K] Transcription	SP1999	TTGAAAGTGTTTACAA	-142	-15
SP2003	SP2003	spr1817	SPD_1801	0.472426	5.86142e-10	6.60412e-09										1	2.9	3.3151e-05	0.00046186										ABC transporter, ATP-binding protein	[V] Defense mechanisms	SP2003
SP2006	SP2006	spr1819	SPD_1818	0.363382	1.13481e-11	1.96266e-10				0.252316	9.32587e-15	6.12868e-13				101	3.09	4.58431e-06	0.000103014										transcriptional regulator ComX2		SP2006
SP2007	SP2007	spr1820	SPD_1819				3.00889	1.63536e-13	5.28664e-12	0.645239	3.17611e-08	1.7151e-07	2.11862	0.00017131	0.00359442	1110	2.47	2.20623e-06	5.95682e-05	0.54	4.43e-05	0.00074137	4.01	9.25e-08	4.24e-06				transcription antitermination protein NusG	[K] Transcription	SP2007
SP2008	SP2008	spr1821	SPD_1820	0.547295	3.13909e-09	2.82763e-08	1.94021	1.38969e-09	1.53087e-08	0.391329	2.38985e-09	1.90477e-08				111				0.39	4.06e-05	0.000714779							preprotein translocase subunit SecE	[U] Intracellular trafficking, secretion, and vesicular transport	SP2008
SP2009	SP2009	spr1822	no_SPD	0.513562	1.69539e-10	2.2383e-09				0.371691	4.49041e-12	1.11715e-10				101				0.24	2.9e-07	1.94e-05	2.69	0.0002649	0.00187149				50S ribosomal protein L33	[J] Translation, ribosomal structure and biogenesis	SP2009
SP2010	SP2010	spr1823	SPD_1821	0.637571	2.88641e-09	2.63432e-08	2.11459	1.1425e-11	2.15951e-10				2.74024	8.27895e-05	0.00228854	1011	2.23	2.24341e-06	6.01062e-05	0.62	7.97e-05	0.00112339							penicillin-binding protein 2A	[M] Cell wall/membrane/envelope biogenesis	SP2010
SP2022	SP2022	spr1834	SPD_1831	0.473861	7.63048e-10	8.379e-09				0.459158	5.89577e-11	9.1674e-10	2.1278	0.00073213	0.011591	1101										0.33	0.00220071	0.0316738	PTS system, IIC component	[G] Carbohydrate transport and metabolism	SP2022
SP2026	SP2026	spr1837	SPD_1834	15.6715	0	0				2.73594	5.81202e-13	1.98463e-11				101	0.08	2.25542e-12	1.12223e-09	1.72	2.97e-06	0.000111	0.27	4.63e-08	2.52e-06				bifunctional acetaldehyde-CoA/alcohol dehydrogenase	[C] Energy production and conversion	SP2026	ATGAAACTGTTTACAA	-85	-23
SP2028	SP2028	spr1839	SPD_1837							0.364168	7.09188e-12	1.55352e-10				100							2.87	3.51e-06	5.76e-05				phosphotyrosine protein phosphatase	[T] Signal transduction mechanisms	SP2028
SP2039	SP2039	spr1850	SPD_1848	0.591943	4.77303e-09	4.00726e-08	1.88763	1.72305e-09	1.85094e-08	0.465671	7.36908e-11	1.12081e-09				111	2.9	3.64136e-06	8.80753e-05										hypothetical protein SPD_1848		SP2039
SP2041	SP2041	spr1852	SPD_1850	0.651482	2.99796e-08	1.964e-07	2.02134	1.58219e-10	2.33879e-09				2.13479	1.19528e-06	0.000106748	1011	1.64	4.33126e-05	0.000558732	0.53	1.49e-05	0.000371929	1.84	0.000415383	0.00264493	0.49	0.000638061	0.0157615	SpoIIIJ family protein	[U] Intracellular trafficking, secretion, and vesicular transport	SP2041
SP2042	SP2042	spr1853	SPD_1851	0.5889	3.52109e-09	3.12294e-08				0.372289	2.26164e-12	6.51014e-11	2.4048	0.0322902	0.174638	1101				0.46	1.24e-06	6.09e-05	2.85	5.73e-05	0.000524767				ribonuclease P	[J] Translation, ribosomal structure and biogenesis	SP2042
SP2044	SP2044	spr1854	SPD_1853	2.55958	2.03115e-12	4.23238e-11	5.36036	6.67244e-14	2.42947e-12	1.60261	2.54678e-08	1.43534e-07	4.81406	1.2133e-07	2.6412e-05	1111													acetate kinase	[C] Energy production and conversion	SP2044	TTGAAAACGCTTAAAA	-21	16
SP2054	SP2054	spr1865	SPD_1864				2.17871	1.96276e-12	4.5873e-11				2.73679	0.0103394	0.0789739	1010													hypothetical protein SPD_1864	[S] Function unknown	SP2054
SP2055	SP2055	spr1866	SPD_1865	5.74118	7.14207e-13	1.68057e-11	6.80101	6.61693e-14	2.43489e-12	3.43895	3.32012e-12	8.82747e-11	3.90424	1.2826e-08	7.44549e-06	1111													alcohol dehydrogenase, zinc-containing	[E] Amino acid transport and metabolism	SP2055	ATGAAAGCCTATACTT	7	54
SP2056	SP2056	spr1867	SPD_1866	3.02652	5.50116e-12	1.03981e-10	2.19356	8.73038e-11	1.39163e-09							11	0.47	1.72492e-07	8.01051e-06										N-acetylglucosamine-6-phosphate deacetylase	[G] Carbohydrate transport and metabolism	SP2056
SP2059	SP2059	spr1870	SPD_1869	0.575677	3.57902e-09	3.15812e-08	2.00199	1.00229e-10	1.55467e-09							11													hypothetical protein SPD_1869	[S] Function unknown	SP2059
SP2060	SP2060	spr1872	SPD_1870	0.390701	8.00471e-14	2.56373e-12	2.69727	5.52891e-14	2.12494e-12	0.566028	9.57582e-10	9.0632e-09	2.80418	0.000136285	0.00300431	1111	3.01	1.79971e-08	1.3337e-06	0.4	5.71e-08	6.21e-06	2.85	2.63e-05	0.000276301				pyrrolidone-carboxylate peptidase	[O] Posttranslational modification, protein turnover, chaperones	SP2060
SP2061	SP2061	spr1873	SPD_1871	0.309845	4.12037e-12	8.00695e-11	2.68175	4.0572e-12	8.99606e-11	0.555149	5.54576e-10	5.83561e-09				111	3.82	6.49381e-06	0.000132269	0.29	8.6e-06	0.000252							hypothetical protein SPD_1871	[S] Function unknown	SP2061
SP2062	SP2062	spr1874	SPD_1872	0.388801	3.94442e-11	6.14584e-10	3.35817	5.25691e-13	1.38806e-11	0.526544	7.26777e-10	7.23247e-09	5.42575	0.000821817	0.0127785	1111	4.37	3.37096e-08	2.30216e-06	0.4	2.31e-06	9.45e-05				0.2	0.00328159	0.0424899	transcriptional regulator, MarR family	[K] Transcription	SP2062
SP2065	SP2065	no_R6	SPD_1876	0.492779	7.96423e-11	1.17227e-09				0.602158	5.67046e-09	4.04717e-08				101	2.41	2.27156e-06	6.03959e-05										MATE efflux family protein	[V] Defense mechanisms	SP2065
SP2067	SP2067	spr1879	SPD_1878	0.394816	2.18881e-12	4.47993e-11				0.534425	1.25759e-08	7.9065e-08	2.65006	2.06792e-05	0.000758163	1101	2.48	1.31167e-07	6.52651e-06	0.64	0.000308	0.00310581	2.29	0.000260378	0.00184328	0.41	0.000456675	0.0127248	hypothetical protein SPD_1878	[H] Coenzyme transport and metabolism	SP2067
SP2068	SP2068	spr1880	SPD_1895	0.544622	1.3323e-09	1.33966e-08				0.377439	5.96394e-11	9.19133e-10	1.51647	0.0387975	0.200492	1101				0.59	3.09e-05	0.000594223	3.03	5.65e-06	8.67e-05				cytidine/deoxycytidylate deaminase family protein	[F] Nucleotide transport and metabolism	SP2068
SP2069	SP2069	spr1881	SPD_1896	0.39091	1.82487e-12	3.8256e-11	1.50455	4.47546e-08	3.14646e-07	0.213625	4.92939e-13	1.75195e-11	2.03163	0.00130517	0.0178973	1111	2.3	1.2764e-08	1.01038e-06	0.57	3.22e-06	0.000118197	4.67	2.42e-09	3.37e-07	0.49	0.00409641	0.0493695	glutamyl-tRNA synthetase	[J] Translation, ribosomal structure and biogenesis	SP2069
SP2084	SP2084	spr1895	SPD_1910							0.376585	4.864e-12	1.16837e-10				100	2.73	5.34493e-05	0.000662505										phosphate ABC transporter, phosphate-binding protein	[P] Inorganic ion transport and metabolism	SP2084	ATTGACAACACTGCCAAAA	downstream of start
SP2085	SP2085	spr1896	SPD_1911							0.49021	7.73422e-11	1.15615e-09				100	2.85	1.81786e-06	5.18985e-05										phosphate ABC transporter, permease protein PstC	[P] Inorganic ion transport and metabolism	SP2085
SP2087	SP2087	spr1898	SPD_1913							0.406658	1.24375e-11	2.38021e-10				100	3.6	6.6204e-06	0.000133288	2.18	0.000162	0.00191347							phosphate ABC transporter, ATP-binding protein	[P] Inorganic ion transport and metabolism	SP2087
SP2088	SP2088	spr1899	SPD_1914							0.450488	2.63831e-11	4.71243e-10				100	3.43	2.13715e-07	9.18973e-06	1.94	0.000943	0.0073							phosphate transport system regulatory protein PhoU	[P] Inorganic ion transport and metabolism	SP2088
SP2096	SP2096	spr1906	SPD_1922										0.313743	0.00772357	0.0642034	1000													peptidase, M20/M25/M40 family protein	[R] General function prediction only	SP2096
SP2100	SP2100	spr1910	SPD_1926							0.47873	5.80197e-10	6.05038e-09				100							2.08	1.5e-05	0.000177939				tyrosyl-tRNA synthetase	[J] Translation, ribosomal structure and biogenesis	SP2100
SP2103	SP2103	spr1913	SPD_1929										0.142726	0.000281917	0.00525089	1000													rRNA (guanine-N1-)-methyltransferase	[H] Coenzyme transport and metabolism	SP2103
SP2105	SP2105	spr1915	SPD_1931	4.43953	4.51772e-12	8.68155e-11	2.29336	5.79514e-11	9.5911e-10	2.05062	6.24279e-09	4.39265e-08				111													hypothetical protein SPD_1931		SP2105	AATGTAAGCAGATACAAAT	-28	12
SP2106	SP2106	spr1916	SPD_1932				3.11073	1.29008e-13	4.33241e-12							10	2.77	1.02974e-08	9.69347e-07							33.86	0.000143655	0.00667136	maltodextrin phosphorylase	[G] Carbohydrate transport and metabolism	SP2106
SP2107	SP2107	spr1917	SPD_1933	0.656993	5.65436e-08	3.40739e-07	3.10033	7.10543e-15	3.41357e-13				3.08165	9.41749e-06	0.000449331	1011	3.03	4.35707e-09	5.62062e-07	0.62	1.34e-05	0.000342	1.69	0.000714341	0.0040522				4-alpha-glucanotransferase	[G] Carbohydrate transport and metabolism	SP2107	TTAAAAACGCTTGCAA	-102	-25
SP2108	SP2108	spr1918	SPD_1934	12.2089	5.55112e-16	3.62289e-14	13.2918	0	0	7.29331	6.81677e-14	3.20849e-12	15.1945	1.14324e-10	3.98191e-07	1111													maltose/maltodextrin ABC transporter, maltose/maltodextrin-binding protein	[G] Carbohydrate transport and metabolism	SP2108	AGGAAAACGTTTGCGT	-51	no clear promoter
SP2109	SP2109	spr1919	SPD_1935	7.55382	0	0	11.2759	0	0	6.37816	8.54872e-15	5.83827e-13	10.7397	4.44473e-06	0.000271596	1111													maltodextrin ABC transporter, permease protein	[G] Carbohydrate transport and metabolism	SP2109
SP2110	SP2110	spr1920	SPD_1936	8.38439	8.54872e-15	3.52024e-13	11.1838	0	0	7.21015	2.10387e-13	8.32703e-12	8.94639	7.52035e-08	2.38122e-05	1111													maltodextrin ABC transporter, permease protein	[G] Carbohydrate transport and metabolism	SP2110
SP2111	SP2111	spr1921	SPD_1937	1.61512	4.99342e-09	4.13211e-08	2.41955	7.84706e-13	1.96688e-11	1.86401	6.27097e-10	6.48124e-09	2.90593	2.11576e-06	0.000156792	1111													maltodextrose utilization protein MalA	[S] Function unknown	SP2111
SP2112	SP2112	spr1922	SPD_1938	1.579	8.10068e-09	6.24059e-08	2.05133	1.87609e-11	3.39759e-10	1.71078	5.56735e-09	4.01472e-08	1.93619	0.00256138	0.0282319	1111													maltose operon transcriptional repressor	[K] Transcription	SP2112
SP2116	SP2116	spr1926	SPD_1944	1.63415	8.1855e-09	6.29192e-08				2.30379	6.1553e-12	1.39214e-10				101				1.98	1.61e-05	0.000385785	0.41	0.000363194	0.00239132				hypothetical protein SPD_1944		SP2116
SP2134	SP2134	spr1943	SPD_1963							0.397237	9.62519e-12	1.9267e-10				100				0.45	1.31e-05	0.000338003	2.4	0.000149738	0.00116675				50S ribosomal protein L32	[J] Translation, ribosomal structure and biogenesis	SP2134
SP2135	SP2135	spr1944	SPD_1964							0.402749	4.64406e-12	1.1391e-10				100				0.48	0.000237448	0.00252915							50S ribosomal protein L33	[J] Translation, ribosomal structure and biogenesis	SP2135
SP2136	SP2136	spr1945	SPD_1965	7.60728	4.59234e-07	2.13794e-06				2.64735	2.86613e-11	5.06738e-10				101	0.17	9.83195e-07	3.29276e-05	1.8	7.93e-05	0.0011227				2.21	0.000141267	0.00664909	choline binding protein PcpA	[R] General function prediction only	SP2136
SP2148	SP2148	spr1955	SPD_1975	6.0482	1.35447e-14	5.38519e-13	10.3873	0	0	3.23176	2.81003e-10	3.32903e-09	5.77677	1.01091e-05	0.000475809	1111													arginine deiminase	[E] Amino acid transport and metabolism	SP2148	TGTAAGCGGTACCC	-46	17
SP2150	SP2150	spr1957	SPD_1976	7.87903	4.44089e-16	2.95405e-14	7.16249	4.64073e-14	1.82412e-12	7.49965	2.9976e-15	2.5465e-13	6.01259	8.35695e-08	2.4256e-05	1111	0.56	0.000240051	0.00209025				0.48	0.000125742	0.00102327				ornithine carbamoyltransferase	[E] Amino acid transport and metabolism	SP2150
SP2151	SP2151	spr1958	SPD_1977	8.16459	1.11022e-16	9.60065e-15	6.98068	1.9984e-15	1.13319e-13	7.68913	1.66534e-15	1.75769e-13	5.95558	2.85812e-06	0.000199097	1111							0.47	0.000338355	0.0022839				carbamate kinase	[E] Amino acid transport and metabolism	SP2151
SP2152	SP2152	spr1959	SPD_1978	8.90511	0	0	7.79932	2.10942e-15	1.15817e-13	8.92595	9.21485e-15	6.17218e-13	7.21853	6.98855e-08	2.43411e-05	1111							0.4	1.77e-05	0.000202593				hypothetical protein SPD_1978	[S] Function unknown	SP2152	TAGAAAGCGTTTTCTT	-72	62
SP2153	SP2153	spr1960	SPD_1979	9.36596	9.99201e-16	5.95903e-14	6.8236	5.71765e-14	2.17333e-12	8.04743	1.08802e-14	7.01772e-13	4.94896	1.95228e-05	0.000723382	1111													hypothetical protein SPD_1979	[E] Amino acid transport and metabolism	SP2153
SP2157	SP2157	spr1963	SPD_1985	2.02617	3.28e-10	3.96697e-09	1.54122	9.02743e-08	5.68777e-07	1.63855	5.65378e-09	4.04355e-08				111													alcohol dehydrogenase, iron-containing	[C] Energy production and conversion	SP2157	TAAAAACGAATACAA	-62	-15	boxes different in D39 and TIGR4
SP2162	SP2162	spr1968	SPD_1990	2.21137	1.49262e-10	2.01678e-09	1.73223	2.45839e-08	1.88549e-07	2.3848	1.30366e-10	1.75315e-09				111													PTS system, IIC component	[G] Carbohydrate transport and metabolism	SP2162
SP2163	SP2163	spr1969	SPD_1991	2.09572	1.81373e-10	2.3497e-09	1.64973	1.36228e-08	1.1273e-07	2.33758	5.13867e-12	1.20121e-10	2.1777	0.0378591	0.196811	1111													PTS system, IIB component	[G] Carbohydrate transport and metabolism	SP2163
SP2164	SP2164	spr1970	SPD_1992	2.23241	2.89281e-11	4.59001e-10	1.70411	1.2169e-08	1.02166e-07	2.41998	5.49028e-12	1.25807e-10	2.22708	0.00966155	0.0751143	1111													PTS system, IIA component	[G] Carbohydrate transport and metabolism	SP2164	TTAAAACGATTACTT			in end gene, but in front of PTS SP2163
SP2166	SP2166	spr1972	SPD_1994	2.00149	2.54394e-10	3.19982e-09	2.08225	9.60904e-10	1.10424e-08	2.52515	3.5425e-12	9.27709e-11	1.66015	0.084911	0.339157	1111													L-fuculose phosphate aldolase	[G] Carbohydrate transport and metabolism	SP2166
SP2167	SP2167	spr1973	SPD_1995	1.95089	2.70973e-10	3.37157e-09	1.90287	1.75679e-08	1.4034e-07	2.08735	2.56525e-10	3.08095e-09				111													L-fuculose kinase FucK, putative	[G] Carbohydrate transport and metabolism	SP2167	AAGTAAGCGTTCACAT	-69	-32
SP2182	SP2182	spr1986	SPD_2009	14.1794	1.11022e-16	1.03791e-14	12.2566	0	0	6.14013	4.94882e-12	1.16464e-10	8.48265	0.00867249	0.0694397	1111													hypothetical protein SPD_2009		SP2182	ATTGTTACCGCTTTCTTTT	-143	-24
SP2183	SP2183	spr1987	SPD_2010	2.04492	1.22205e-10	1.68409e-09										1	0.21	5.77654e-06	0.000121938										hypothetical protein SPD_2010		SP2183
SP2184	SP2184	spr1988	SPD_2011	3.68679	3.19744e-14	1.15208e-12				2.67577	1.10899e-11	2.18227e-10				101	0.16	1.08142e-08	9.18675e-07				0.19	7.09e-06	0.000101186				glycerol uptake facilitator protein	[G] Carbohydrate transport and metabolism	SP2184
SP2185	SP2185	spr1990	SPD_2012	3.18907	7.97584e-13	1.86408e-11	0.656201	2.90126e-09	2.96907e-08	2.81439	2.44538e-12	6.75972e-11	1.88352	0.00624156	0.0557419	1111	0.08	5.31987e-10	1.02939e-07				0.19	2.57e-05	0.000271573	0.33	0.00775947	0.0757037	alpha-glycerophosphate oxidase	[C] Energy production and conversion	SP2185	TGTCAAAGCTTTCAT	downstream of start
SP2186	SP2186	spr1991	SPD_2013	3.20008	3.04867e-13	7.64156e-12				2.4504	2.36633e-12	6.59354e-11	1.56904	0.0734269	0.308872	1101	0.07	5.04556e-11	1.75737e-08	0.65	0.000829	0.00657928	0.21	6.6e-06	9.74e-05				glycerol kinase	[C] Energy production and conversion	SP2186	AAGAAAGCGCTTTATT	-67	-2
SP2187	SP2187	spr1992	SPD_2014	3.34588	3.87468e-14	1.34025e-12	2.58191	2.07168e-13	6.23124e-12	3.02842	4.9137e-11	7.88683e-10				111	0.47	8.38679e-06	0.000155379				0.36	3.03e-05	0.000310917				hypothetical protein SPD_2014		SP2187	AATGAAAGGGGTAACAAAT	-8	no promoter predictable
SP2206	SP2206	spr2011	SPD_2033	8.15703	4.80727e-14	1.59888e-12	6.14634	8.88178e-16	6.02394e-14	3.68468	2.04287e-11	3.72529e-10	3.97411	1.92595e-05	0.000721299	1111													ribosomal subunit interface protein	[J] Translation, ribosomal structure and biogenesis	SP2206	ATGAAAGCGTTATAAT	-50	-3
SP2209	SP2209	spr2014	SPD_2036	0.617046	1.61615e-06	6.38159e-06				0.367297	5.65992e-13	1.97135e-11				101							2.3	5.33e-05	0.000491403				hypothetical protein SPD_2036	[S] Function unknown	SP2209
SP2215	SP2215	spr2020	SPD_2042	0.461922	4.95048e-11	7.4451e-10				0.24456	3.78427e-11	6.30652e-10	2.03838	3.17639e-06	0.000208743	1101				0.35	3.81e-08	4.57e-06	3.3	2.92e-08	2.07e-06	0.39	0.000233409	0.00874153	30S ribosomal protein S2	[J] Translation, ribosomal structure and biogenesis	SP2215
SP2216	SP2216	spr2021	SPD_2043	0.329357	4.05254e-12	7.91962e-11										1				0.27	2.94e-10	5.39e-08	2.13	0.000176305	0.00134076				secreted 45 kDa protein precursor	[S] Function unknown	SP2216
SP2225	SP2225	spr2030	SPD_2052	0.53118	5.95835e-08	3.55344e-07				0.309861	1.29563e-13	5.37224e-12	0.57782	0.0283955	0.159261	1101													hypothetical protein SPD_2052	[R] General function prediction only	SP2225	ATGTAAGCGATTTTTA	-86	-53
SP2227	SP2227	spr2032	SPD_2054				2.08941	1.89682e-12	4.46332e-11				1.54396	0.00611377	0.0551665	1010													recombination protein F	[L] Replication, recombination and repair	SP2227
SP2230	SP2230	spr2035	SPD_2057							0.466891	5.51804e-11	8.65736e-10	0.657553	0.0387473	0.20053	1100													ABC transporter, ATP-binding protein	[R] General function prediction only	SP2230
SP2233	SP2233	spr2039	SPD_2059	0.240771	3.24185e-13	8.06731e-12	1.87393	4.88001e-09	4.58694e-08	0.319331	7.23105e-11	1.10464e-09				111	8.87	1.29176e-09	2.2496e-07				5.33	0.000222115	0.00160837				hypothetical protein	[S] Function unknown	SP2233
SP2234	SP2234	spr2040	SPD_2060	0.563137	1.59722e-09	1.57851e-08				0.465357	1.0734e-10	1.4895e-09				101													transcriptional regulator, TetR family protein	[K] Transcription	SP2234
SP2235	SP2235	spr2041	SPD_2063	0.368256	6.13176e-13	1.45272e-11				0.4502	1.78433e-11	3.30575e-10				101	3.08	1.82447e-07	8.25277e-06										response regulator	[K] Transcription	SP2235
SP2236	SP2236	spr2042	SPD_2064	0.304669	6.75016e-14	2.20272e-12				0.44768	4.56888e-11	7.40158e-10				101	3.53	2.66038e-07	1.09013e-05										putative sensor histidine kinase ComD	[T] Signal transduction mechanisms	SP2236
SPD_0087	SP0089	no_R6	SPD_0087	2.59963	1.35285e-09	1.35246e-08	0.638238	6.05459e-06	2.35843e-05				0.662806	0.00864234	0.0693577	1011	0.19	4.86918e-07	1.86366e-05							3.36	9.53e-06	0.00174705	hypothetical protein SPD_0087	[]	SPD_0087
SPD_0118	no_SP	no_R6	SPD_0118				0.192015	9.88099e-13	2.40692e-11				0.277675	4.26682e-06	0.000265381	1010	0.66	7.87565e-05	0.000887731	1.94	2.82e-06	0.000108012	0.5	0.00044187	0.00277303	2.69	0.00206399	0.0303328	hypothetical protein SPD_0118	[]	SPD_0118
SPD_0882	no_SP	spr0899	SPD_0882				0.665167	2.33342e-07	1.32316e-06	0.413093	8.2444e-10	7.99867e-09				110							4.49	4.45e-09	5.34e-07	2.61	9.66e-05	0.00551512	IS630-Spn1, transposase Orf2, truncation	[]	SPD_0882
SPD_1299	no_SP	no_R6	SPD_1299	4.04755	2.67564e-14	9.95164e-13	2.29887	4.8711e-10	6.19454e-09	2.19226	2.54756e-10	3.0703e-09				111				2.01	4.35e-05	0.000739593							hypothetical protein SPD_1299	[]	SPD_1299
SPD_1873	no_SP	no_R6	SPD_1873	0.455829	4.23367e-09	3.66107e-08	2.92238	2.91434e-13	8.19568e-12	0.446372	1.12659e-11	2.20444e-10	16.1431	0.0104672	0.0797752	1111	4.7	7.70395e-11	2.06407e-08	0.3	5.02e-05	0.000820512	18.7	1.11e-05	0.000143008				hypothetical protein SPD_1873	[]	SPD_1873
SPD_1917	no_SP	no_R6	SPD_1917							0.410953	4.26763e-07	1.68337e-06				100													hypothetical protein SPD_1917	[]	SPD_1917
SPD_2001	no_SP	no_R6	SPD_2001				0.583918	7.85895e-08	5.09065e-07	0.49	9.57022e-11	1.36611e-09				110							12.55	2.5e-05	0.000265784				hypothetical protein SPD_2001	[]	SPD_2001
spr0015	no_SP	spr0015	no_SPD							0.497502	3.29764e-10	3.81584e-09				100													hypothetical protein	[]	spr0015
spr0033_Dde_3	SP0033	spr0033	SPD_0039	2.80503	1.47953e-11	2.48431e-10	6.60931	4.48053e-12	9.68634e-11	2.11202	1.54331e-06	5.3274e-06	2.77226	0.0313176	0.17097	1111				0.39	1.23e-07	1.16e-05							hypothetical protein SPD_0039	[R]	spr0033_Dde_3
spr0067	no_SP	spr0067	SPD_0073	0.355057	9.67448e-13	2.20158e-11				0.43094	8.48556e-11	1.25767e-09				101	2.85	1.917e-05	0.000291567				7.73	0.000203002	0.00150758				hypothetical protein SPD_0073	[S]	spr0067
spr0067_Taq_3	no_SP	spr0067	SPD_0073	0.188693	7.77156e-16	4.88761e-14	1.94918	7.53976e-09	6.72166e-08	0.230687	1.28786e-14	8.01002e-13				111	8.76	5.7422e-11	1.81819e-08	0.43	6.59e-05	0.000972673	6.41	0.000149477	0.00116995				hypothetical protein SPD_0073	[S]	spr0067_Taq_3
spr0098_Taq_3	no_SP	spr0098	SPD_0106										5.30698	5.70628e-05	0.00172826	1000										0.01	0.00100506	0.0209619	bacteriocin, putative	[]	spr0098_Taq_3
spr0107	no_SP	spr0107	SPD_0114	0.0838054	2.22045e-16	1.70678e-14	0.0840582	1.54987e-13	5.05755e-12	0.147668	5.70433e-13	1.96715e-11	0.104532	0.0218861	0.134919	1111													hypothetical protein SPD_0114	[]	spr0107
spr0107_Taq_3	no_SP	spr0107	SPD_0114	0.034849	8.88178e-16	5.48609e-14	0.0311925	4.996e-15	2.54135e-13	0.0335218	0	0	0.0190083	8.66907e-07	9.43574e-05	1111													hypothetical protein SPD_0114	[]	spr0107_Taq_3
spr0108_Taq_3	no_SP	spr0108	SPD_0115	0.0251343	0	0	0.0287131	0	0	0.0302416	0	0	0.00835755	2.86523e-09	3.32653e-06	1111													hypothetical protein SPD_0115	[S]	spr0108_Taq_3
spr0111_Taq_3	no_SP	spr0111	SPD_0117				0.255839	2.09269e-11	3.75058e-10							10													hypothetical protein SPD_0117	[]	spr0111_Taq_3
spr0112	no_SP	spr0112	no_SPD				0.259527	5.27356e-14	2.04958e-12							10	0.48	1.17675e-06	3.72602e-05										hypothetical protein	[]	spr0112
spr0112_Taq_3	no_SP	spr0112	no_SPD				0.314554	2.15509e-09	2.27965e-08				0.345135	6.85632e-07	7.96018e-05	1010													hypothetical protein	[]	spr0112_Taq_3
spr0113	no_SP	spr0113	SPD_0119				0.251386	2.18714e-14	9.11484e-13				0.327033	0.0151112	0.102999	1010	0.44	1.29429e-07	6.53337e-06	1.74	8.94e-06	0.000259492	0.4	7.78e-05	0.000672766				hypothetical protein SPD_0119	[]	spr0113
spr0113_Dde_3	no_SP	spr0113	SPD_0119				0.169367	1.11022e-16	1.16372e-14				0.198883	9.23014e-05	0.00234661	1010	0.48	1.64543e-08	1.24588e-06				0.24	2.51e-07	8.25e-06				hypothetical protein SPD_0119	[]	spr0113_Dde_3
spr0114	no_SP	spr0114	SPD_0120				0.209717	1.11022e-15	7.24578e-14				0.286009	0.00010702	0.00258855	1010	0.39	1.8356e-06	5.19789e-05				0.19	5.95e-07	1.43e-05				hypothetical protein SPD_0120	[]	spr0114
spr0115_Taq_3	no_SP	spr0115	SPD_0121	0.627525	9.63875e-07	4.06095e-06	0.150472	1.11022e-16	1.20008e-14				0.364465	6.87321e-05	0.00201171	1011	0.42	5.28954e-06	0.000114431				0.06	5.8e-11	3.37e-08				hypothetical protein SPD_0121	[]	spr0115_Taq_3
spr0116_Taq_3	no_SP	spr0116	no_SPD				0.163104	1.77636e-15	1.02407e-13	1.77123	1.11997e-08	7.15752e-08	0.0402504	0.000434011	0.00752069	1110	0.36	1.32814e-07	6.51537e-06				0.12	1.9e-09	2.88e-07				hypothetical protein	[]	spr0116_Taq_3
spr0117	no_SP	spr0117	SPD_0122				0.182877	1.11022e-16	1.09722e-14				0.365732	0.0120848	0.0882418	1010	0.36	2.40087e-09	3.80101e-07				0.31	3.83e-05	0.000379359				hypothetical protein SPD_0122	[]	spr0117
spr0117_Taq_3	no_SP	spr0117	SPD_0122	0.624554	6.20809e-06	2.09296e-05	0.121481	2.10942e-15	1.17685e-13				0.302484	9.191e-07	9.70068e-05	1011	0.37	2.3863e-07	9.89462e-06	1.81	8.52e-05	0.00118	0.11	1.47e-10	4.67e-08				hypothetical protein SPD_0122	[]	spr0117_Taq_3
spr0118_Taq_3	no_SP	spr0118	SPD_0123				0.139756	0	0				0.414785	1.57329e-05	0.000629858	1010	0.41	8.47307e-07	2.92195e-05	1.72	0.000130434	0.00164007	0.07	1.72e-10	4.99e-08	0.35	0.00582332	0.0620264	hypothetical protein SPD_0123	[]	spr0118_Taq_3
spr0119_Dde_3	no_SP	spr0119	SPD_0124				0.125155	5.76206e-14	2.16641e-12	1.73636	3.8846e-08	2.05001e-07	0.187927	9.49198e-07	9.72369e-05	1110	0.39	1.16411e-08	9.65379e-07	2.5	2.37e-07	1.8e-05	0.09	3.61e-11	3.15e-08				hypothetical protein SPD_0124	[]	spr0119_Dde_3
spr0121_Taq_3	no_SP	spr0121	SPD_0126	3.71721	4.3656e-11	6.74134e-10	4.37013	4.46532e-12	9.71417e-11	3.49093	1.30743e-10	1.75146e-09				111							0.44	3.87e-05	0.000382107				pneumococcal surface protein A	[R]	spr0121_Taq_3
spr0153_Dde_3	SP0155	spr0153	SPD_0157	2.71714	1.07506e-10	1.5303e-09	3.17369	2.67547e-09	2.77911e-08	2.73197	9.24916e-12	1.88391e-10	2.58408	0.000127783	0.00289004	1111													sensor histidine kinase, putative	[T]	spr0153_Dde_3
spr0176_Taq_3	no_SP	spr0176	SPD_0181							0.413993	3.95778e-10	4.43246e-09				100				0.6	0.000603026	0.00503678	3.78	3.65e-07	1.04e-05				Holliday junction resolvase-like protein	[L]	spr0176_Taq_3
spr0190_Dde_3	SP0211	spr0190	SPD_0195							0.322746	1.71759e-11	3.23372e-10	1.70129	1.52849e-05	0.000626321	1100				0.63	2.61e-05	0.000540853	2.73	5.63e-07	1.37e-05	0.43	0.000363576	0.0114084	50S ribosomal protein L23	[J]	spr0190_Dde_3
spr0193	SP0214	spr0193	SPD_0198							0.404136	1.297e-10	1.75777e-09	1.51397	0.0122187	0.0886621	1100				0.51	3.69e-06	0.000131302	3.33	1.62e-05	0.000189467				50S ribosomal protein L22	[J]	spr0193
spr0257_Dde_3	no_SP	spr0257	no_SPD							0.181026	6.53118e-09	4.58631e-08				100							5.05	5.79e-09	6.5e-07				hypothetical protein	[]	spr0257_Dde_3
spr0311_Taq_3	no_SP	spr0311	SPD_0313	0.549431	1.06691e-09	1.09185e-08	0.284475	4.31086e-10	5.5639e-09				0.243974	0.00658031	0.057731	1011	0.54	7.32926e-06	0.000141821				0.37	0.000189359	0.00142142				hypothetical protein SPD_0313	[]	spr0311_Taq_3
spr0321	no_SP	spr0321	SPD_0329							2.27685	1.85492e-10	2.35791e-09				100	0.36	1.25612e-07	6.43394e-06										dTDP-4-dehydrorhamnose 3,5-epimerase, putative	[M]	spr0321
spr0322_Dde_3	no_SP	spr0322	SPD_0330							1.8717	5.45063e-07	2.08392e-06	2.05785	2.72156e-05	0.000929332	1100													dTDP-glucose 4,6-dehydratase	[M]	spr0322_Dde_3
spr0323_Taq_3	no_SP	spr0323	SPD_0331										2.19416	0.00182334	0.022681	1000													dTDP-4-dehydrorhamnose reductase	[M]	spr0323_Taq_3
spr0326_Taq_3	no_SP	spr0326	SPD_0333	2.6702	1.81037e-11	2.95381e-10				2.32314	1.56634e-07	6.94976e-07	0.650209	0.0298205	0.165127	1101				1.65	2.21e-05	0.000483095				2.31	0.00202888	0.0300706	hypothetical protein SPD_0333	[]	spr0326_Taq_3
spr0418_Taq_3	no_SP	spr0418	no_SPD							0.414939	4.56868e-12	1.12856e-10				100													hypothetical protein	[]	spr0418_Taq_3
spr0419_Taq_3	no_SP	spr0419	no_SPD							0.368601	3.56837e-11	6.03331e-10				100	36.44	0.000423038	0.00325263										hypothetical protein	[]	spr0419_Taq_3
spr0445_Dde_3	no_SP	spr0445	SPD_0451	0.176151	0	0	0.209501	5.55112e-16	4.08538e-14	0.187928	1.25455e-14	7.94474e-13	0.064388	5.30802e-06	0.00030813	1111							0.48	0.000705795	0.00402338				type I restriction-modification system, S subunit, putative	[V]	spr0445_Dde_3
spr0470_Taq_3	no_SP	spr0470	no_SPD	0.385556	3.35808e-11	5.27982e-10							0.492551	4.75672e-06	0.000285649	1001	7.98	1.01047e-08	9.7763e-07				0.01	3.61e-13	1.26e-09	0.01	0.00138107	0.0240513	hypothetical protein	[]	spr0470_Taq_3
spr0500_Taq_3	no_SP	spr0500	no_SPD				0.391453	2.55159e-09	2.67453e-08							10													hypothetical protein	[]	spr0500_Taq_3
spr0567_Dde_3	no_SP	spr0567	SPD_0563				0.332053	4.81365e-11	8.12215e-10							10													transposase, putative, degenerate	[L]	spr0567_Dde_3
spr0586	SP0670	spr0586	SPD_0582							0.339282	2.50244e-13	9.57803e-12				100													hypothetical protein SPD_0582	[]	spr0586
spr0594_Taq_3	SP0677	spr0594	SPD_0589							0.318135	2.13207e-12	6.18834e-11	1.64655	0.0168434	0.112171	1100							4.42	2.58e-07	8.34e-06				hypothetical protein SPD_0589	[S]	spr0594_Taq_3
spr0600_Taq_3	no_SP	spr0600	SPD_0595	39.665	0	0	45.171	0	0	20.2483	2.77556e-15	2.47879e-13				111										18.43	0.000291719	0.00986462	lactococcin 972, putative	[]	spr0600_Taq_3
spr0615_Taq_3	SP0703	spr0615	SPD_0610	55.9626	0	0	58.8079	0	0	24.1527	2.88658e-15	2.51349e-13	53.6672	1.59125e-06	0.000128892	1111													hypothetical protein SPD_0610	[]	spr0615_Taq_3
spr0730_Taq_3	no_SP	spr0730	SPD_0722							0.569054	1.61209e-08	9.85073e-08	0.424132	0.00327583	0.0340589	1100													YjeF-like protein	[G]	spr0730_Taq_3
spr0743_Taq_3	SP0841	spr0743	SPD_0735										3.04684	0.0094475	0.0736144	1000													methyltransferase small subunit	[J]	spr0743_Taq_3
spr0803_Taq_3	no_SP	spr0803	SPD_0796	2.33984	1.79701e-11	2.9459e-10	2.05512	3.34067e-06	1.39558e-05	2.31863	1.33789e-10	1.77858e-09				111							0.16	1.29e-07	5.36e-06				hypothetical protein SPD_0796	[]	spr0803_Taq_3
spr0854	no_SP	spr0854	SPD_0841	1.62368	4.91378e-09	4.08576e-08	1.81688	8.28999e-09	7.33378e-08	2.13465	1.2996e-10	1.75445e-09	2.06684	0.0223731	0.136233	1111							0.26	0.000270503	0.00189952				alanine dehydrogenase	[E]	spr0854
spr0859_Taq_3	SP0957	spr0859	SPD_0845	0.490593	3.43737e-11	5.38003e-10	0.545225	1.37803e-09	1.52288e-08							11													ABC transporter, ATP-binding protein	[V]	spr0859_Taq_3
spr1026_Taq_3	no_SP	spr1026	no_SPD				2.16578	7.26273e-08	4.75791e-07							10													hypothetical protein	[]	spr1026_Taq_3
spr1027_Dde_3	no_SP	spr1027	SPD_1003				2.31531	3.78574e-10	4.90445e-09							10													hypothetical protein SPD_1003	[]	spr1027_Dde_3
spr1033	no_SP	spr1033	SPD_1009	5.18721	2.54974e-12	5.12764e-11				3.18537	2.29761e-12	6.50615e-11	1.77876	0.0199678	0.126681	1101							0.22	0.000564973	0.0033811				phosphoserine phosphatase	[E]	spr1033
spr1033_serB-t	no_SP	spr1033	SPD_1009				2.67282	1.37252e-10	2.06415e-09							10													phosphoserine phosphatase	[E]	spr1033_serB-t
spr1081_Taq_3	no_SP	spr1081	SPD_1058	6.1612	2.33147e-15	1.20366e-13	3.8025	5.73652e-13	1.49193e-11	5.91755	4.44089e-16	6.18705e-14	4.54502	0.000105212	0.00256262	1111	0.55	8.59252e-06	0.000158348				0.23	9.25e-07	2e-05				PTS system IIA component, putative	[G]	spr1081_Taq_3
spr1185_Taq_3	no_SP	spr1185	SPD_1162	3.70661	2.84439e-13	7.18157e-12	2.411	2.51886e-08	1.9191e-07	3.11141	1.53756e-09	1.33217e-08				111													hypothetical protein SPD_1162	[K]	spr1185_Taq_3
spr1189	no_SP	spr1189	SPD_1165	2.35165	4.74341e-10	5.50586e-09				2.19805	6.22409e-09	4.38836e-08				101	0.46	2.38622e-05	0.000353668										hypothetical protein SPD_1165	[I]	spr1189
spr1189_Dde_3	no_SP	spr1189	SPD_1165	2.66971	1.58273e-12	3.42167e-11	1.96119	3.21301e-06	1.35534e-05	3.84737	8.85359e-12	1.83554e-10	1.89521	0.0535947	0.248894	1111													hypothetical protein SPD_1165	[I]	spr1189_Dde_3
spr1190_Dde_3	no_SP	spr1190	SPD_1166	2.33228	1.93957e-07	9.9392e-07										1													hypothetical protein SPD_1166	[]	spr1190_Dde_3
spr1191_Taq_3	no_SP	spr1191	SPD_1167							2.08056	1.75938e-05	5.01057e-05				100													ABC transporter, ATP-binding protein	[R]	spr1191_Taq_3
spr1192_Dde_3	no_SP	spr1192	SPD_1168							2.31544	2.53709e-07	1.06723e-06	2.60456	0.0238003	0.141221	1100													oligopeptide ABC transporter, pemease protein	[E]	spr1192_Dde_3
spr1193_Dde_3	no_SP	spr1193	SPD_1169	2.02341	1.43089e-06	5.76859e-06				2.07102	3.95395e-07	1.5757e-06	1.90282	0.0117869	0.0867944	1101				2.08	0.000185898	0.00208865	0.32	4.82e-05	0.000454971				oligopeptide ABC transporter, permease protein	[E]	spr1193_Dde_3
spr1286	no_SP	spr1286	SPD_1259							0.442222	7.31915e-12	1.56396e-10				100							2.8	0.000491782	0.00301563				type II restriction endonuclease, uncharacterized truncation	[]	spr1286
spr1428_Taq_3	no_SP	spr1428	no_SPD							0.351635	2.17447e-10	2.69526e-09				100													conserved hypothetical protein	[]	spr1428_Taq_3
spr1523_Taq_3	no_SP	spr1523	SPD_1491	17.535	0	0	7.79874	0	0	14.156	0	0	16.2982	3.87332e-05	0.00126082	1111													hypothetical protein SPD_1491	[]	spr1523_Taq_3
spr1549_Taq_3	no_SP	spr1549	SPD_1517	2.34382	1.50449e-11	2.51402e-10										1													hypothetical protein SPD_1517	[]	spr1549_Taq_3
spr1618_Taq_3	no_SP	spr1618	SPD_1583	2.25352	2.23247e-09	2.12731e-08				6.41312	2.26486e-14	1.27234e-12				101				2.29	0.000163245	0.0019274				13.34	0.000533487	0.0139709	ABC transporter, permease protein	[G]	spr1618_Taq_3
spr1620_Dde_3	no_SP	spr1620	SPD_1585	3.38327	4.82447e-12	9.21981e-11										1													ABC transporter, sugar-binding protein	[G]	spr1620_Dde_3
spr1642	no_SP	spr1642	SPD_1606	2.34364	3.06065e-10	3.71466e-09	1.89336	3.98685e-08	2.87902e-07				1.90716	0.0811903	0.329972	1011													MgtC/SapB family protein	[S]	spr1642
spr1661	no_SP	spr1661	SPD_1627							1.81196	2.93002e-08	1.6046e-07	0.388686	0.00227518	0.0263271	1100	0.55	8.55994e-05	0.000952532				0.3	7.19e-05	0.000638928				hypothetical protein	[]	spr1661
spr1661_Taq_3	no_SP	spr1661	SPD_1627							1.78066	8.04766e-08	3.92028e-07	0.468494	6.41105e-06	0.000338329	1100										2.56	0.00030583	0.0100491	hypothetical protein	[]	spr1661_Taq_3
spr1677_Dde_3	SP1860	spr1677	SPD_1642							1.95251	5.27927e-09	3.86296e-08	0.439329	0.00375567	0.0382486	1100										11.24	1.53e-06	0.001329	choline transporter (glycine betaine transport system permease protein)	[M]	spr1677_Dde_3
spr1688_Dde_3	SP1873	spr1688	SPD_1653				2.44695	4.39903e-09	4.16884e-08	2.219	1.17316e-09	1.06687e-08				110													hypothetical protein SPD_1653	[S]	spr1688_Dde_3
spr1729_Taq_3	no_SP	spr1729	SPD_1716	1.55492	1.0375e-06	4.32373e-06	4.1323	3.66102e-10	4.7607e-09	1.7982	1.27044e-07	5.79183e-07	4.85919	1.04659e-05	0.000479642	1111													hypothetical protein SPD_1716	[R]	spr1729_Taq_3
spr1817_Dde_3	no_SP	spr1817	SPD_1801	0.376492	3.9688e-10	4.70139e-09				0.388398	4.05587e-12	1.03114e-10				101	13.58	8.99365e-11	2.23749e-08	4.33	1.37e-06	6.35e-05	6.08	0.000794052	0.00443218				ABC transporter, ATP-binding protein	[V]	spr1817_Dde_3
spr1840_Dde_3	SP2029	spr1840	SPD_1838							0.294503	3.6274e-11	6.10349e-10				100							5.84	1.9e-08	1.57e-06				preprotein translocase subunit YajC	[U]	spr1840_Dde_3
spr2037	no_SP	spr2037	no_SPD	0.431278	2.67638e-10	3.3421e-09										1	4.95	2.6866e-08	1.87149e-06										conserved hypothetical protein	[S]	spr2037
spr2038	no_SP	spr2038	SPD_2059	0.415785	1.87055e-11	3.03766e-10				0.567708	5.22364e-08	2.64832e-07				101	6.58	6.39823e-08	3.71417e-06				11.15	0.000503127	0.00306362				conserved hypothetical protein	[S]	spr2038
SPXX17	SP1693	spr1536	SPD_1504	10.3225	6.88338e-15	2.93946e-13	6.21807	1.06581e-14	4.78786e-13	6.11404	5.55112e-16	7.43636e-14	28.0004	0.00531744	0.0504649	1111													sialidase A precursor		SPXX17
SPXX18	SP0368	spr0328	SPD_0335	3.75742	3.9968e-14	1.36881e-12	1.92146	3.99468e-08	2.87867e-07	2.68484	7.15106e-12	1.5567e-10				111													cell wall surface anchor family protein		SPXX18	ATGTAAACGCTTGCTC	-32	unclear promoter
SPXX27	SP1125	no_R6	SPD_1009	10.4978	4.44089e-16	3.07221e-14	5.28406	2.77556e-14	1.12949e-12	8.04956	8.32667e-15	5.80036e-13				111										4.03	0.00728683	0.0723078			SPXX27
SPXX29	SP2232	spr2037	no_SPD	0.344207	8.38415e-10	9.03451e-09				0.56295	1.25344e-07	5.73682e-07				101	6.24	3.91758e-08	2.52684e-06												SPXX29
SPXX36	SP2063	spr1875	SPD_1874	0.165878	2.76446e-14	1.01726e-12	6.81898	3.33067e-16	2.80995e-14	0.285003	3.72356e-10	4.22449e-09	33.2909	8.2354e-06	0.000415709	1111	4.31	3.98574e-10	8.16608e-08	0.1	7.64e-14	8.87e-11	16.92	1.25e-10	4.34e-08	0.34	0.00046294	0.0126962	LysM domain-containing protein		SPXX36
SPXX38	SP1954	spr1771	SPD_1753	62.0034	0	0	2.83995	2.52152e-09	2.65104e-08	29.309	0	0	20.3828	0.00540011	0.050697	1111	0.43	0.000144994	0.0013874	9.85	1.31e-12	3.8e-10				10.72	8.52e-05	0.00520558	serine protease, subtilase family protein		SPXX38
SPXX41	SP1693	no_R6	SPD_1504	9.25654	7.54952e-15	3.18461e-13	5.74967	2.56462e-14	1.05607e-12	4.79148	8.79852e-13	2.78593e-11	3.36701	0.0235943	0.140959	1111													sialidase A precursor		SPXX41
SPXX44	SP0952	spr0854	SPD_0841	1.71302	7.80593e-09	6.05397e-08	2.10128	3.11604e-09	3.14238e-08	2.97999	6.21503e-13	2.10164e-11				111													hypothetical protein		SPXX44	TGAATACGGTTACTT	downstream of start
SPXX57	SP1908	spr1724	SPD_1711	0.443152	1.77977e-10	2.3319e-09				0.640194	1.77661e-07	7.81305e-07				101	2.42	1.17735e-05	0.000204015										single-strand DNA-binding protein		SPXX57
SPXX64	SP1417	spr1274	SPD_1248	2.10631	9.40603e-12	1.67709e-10				2.20135	5.05488e-11	8.07621e-10	0.602379			1101													hypothetical protein SPD_1248		SPXX64
