# Supplementary material for: CcpA Ensures Optimal Metabolic Fitness of Streptococcus pneumoniae
Source: PLoS One. 2011 Oct 21;6(10):e26707. doi: 10.1371/journal.pone.0026707 (PMC3198803; doi:10.1371/journal.pone.0026707)
Supplement: Table S2 — Expression ratio of selected genes linked to metabolic and virulence pathways ( spd_0420 (pfl), spd_0667 (sodA), spd_0790 (pyk), spd_1053 (lacE), spd_1078 (ldh), spd_1504 (nanA) and spd_1634 (galK) as determined by qRT-PCR in exponentially and transition to stationary phases of growth. Samples were obtained as described for the microarray experiments and the experiments performed as in Materials and Methods. The qRT-PCR data were normalized to the level of metG (spd_0689) cDNA and the data are averages of four repeats. (XLS) [file pone.0026707.s003.xls]

## Sheet: Table S2
Gene name	D39 locus tag	TIGR4 locus tag	Transcript abundance by qRT-PCR: ratio ccpA/wt								Fold-change by microarray analysis: ratio ccpA/wt
			Glc_M		Glc_TS		Gal_M				Glc_M		Glc_TS		Gal_M
			average	stdev	average	stdev	average	stdev			ratio	Bayes.p	ratio	Bayes.p	ratio	Bayes.p
pfl	SPD_0420	SP0459	10.5629	3.05798	6.26026	0.596315	3.66395	0.380302			6.57848	2.77556e-15	3.22413	1.61491e-08	1.98632	2.37407e-09
sodA	SPD_0667	SP0766	5.42748	0.597382	1.4298	0.122066	4.03505	0.13382			3.74017	1.4036e-11	1.46825	0.000703204	3.02569	7.05769e-13
pyk	SPD_0790	SP0879	1.13341	0.0773302	0.459292	0.00774397	0.863874	0.0119049			0.775106	0.0039237	0.841391	0.000772743	0.592521	6.51008e-10
lacE	SPD_1053	SP1193	2.82342	0.193434	1.53326	0.299026	0.333674	0.0519905			1.61463	6.95263e-09	1.44708	1.11752e-06	0.181929	6.66134e-16
ldh	SPD_1078	SP1220	0.212565	0.0745982	0.215802	0.00100937	0.779831	0.00280426			0.251968	1.63325e-12	0.222119	2.18381e-13	0.366366	1.8685e-13
nanA	SPD_1504	SP1693	23.9247	3.98889	11.2078	0.160839	25.0571	2.35917			10.3225	6.88338e-15	6.11404	5.55111e-16	6.21807	1.06581e-14
galK	SPD_1634	SP1853	8.77349	2.00737	10.2163	1.56078	9.94623	2.93826			3.31116	8.4488e-14	2.91064	1.1916e-12	4.81357	4.6263e-13
*see text for gene names; data are averages of four repeats
