# Supplementary material for: CcpA Ensures Optimal Metabolic Fitness of Streptococcus pneumoniae
Source: PLoS One. 2011 Oct 21;6(10):e26707. doi: 10.1371/journal.pone.0026707 (PMC3198803; doi:10.1371/journal.pone.0026707)
Supplement: Table S5 — List of genes with putative cre sites, as predicted and compiled in this study as described in detail in the Materials and Methods. (XLS) [file pone.0026707.s006.xls]

## Sheet: Table S5
Table S5. List of genes with putative cre sites.
Sequence cre site	TIGR4 locus tag	D39 locus tag
ATatAAtCGCTaTCAa	SP0057	SPD_0063
ATGAAAGCGCaaaCtT	SP0060	SPD_0065
ATGAAAAAGTTTTCAA	SP0090	SPD_0088
ATGtAAtCGtTaTCAa	SP0090	SPD_0088
TGTAAACGATTTCA	SP0096	SPD_0092
ACAAAAACGCTTACAT	SP0097	SPD_0093
TGAAAGCGCTATCCA	no match	SPD_0106
TGGATAGCGCTTTCA	SP0114	SPD_0105
TGAAAGCGCTATCCA	no match	SPD_0117
TTGCAAACGCTTACCA	SP0122	SPD_0131
TTCAAGCGTTTTCA	SP0153	SPD_0155
TGAAAACGCTTGAAA	SP0154	SPD_0156
ATGAAAGCcaTTatAa	SP0238	SPD_0220
TAAAAACGCTTACA	SP0243	SPD_0227
AaGAAAaCGCTTgCAT	SP0268	SPD_0250
ATGAAAaCGgTTTata	SP0284	SPD_0264
tgGAAAagGCTTTCtT	SP0285	SPD_0265
AaGAAtGCGtTTTCAT	SP0303	SPD_0277
tTGgAAaCGCTTTatT	SP0305	SPD_0279
taGAAAcCGtTTaCAa	SP0314	SPD_0287
TTGTAAACGGTTTCTA	SP0313	SPD_0286
ATattAGCGCTTTCAT	SP0320	SPD_0292
ATGAAAGCGCTaatAT	SP0321	SPD_0293
AGAAAACGATTTGA	SP0346	SPD_0315
TTAAAGCGCCTTCT	spr0317	SPD_0325
ATGTAAACGCTTGCTC	SP0368	SPD_0335
taGAAAatGtTaTaAT	SP0400	SPD_0365
TTTAAGCGCTTTTA	SP0410	SPD_0374
TTAAAACTTTTTCT	SP0413	SPD_0377
ATGAAATCGGTATCTT	SP0445	SPD_0404
TGAAATCGGTTACTT	SP0459	SPD_0420
caGAAAGCGtTgTCAa	SP0473	SPD_0423
tTGAcAaCGCTTTCtg	SP0474	SPD_0424
tatAAAGCGCTTTCtT	SP0496	SPD_0443
tatAAAGCGCTTTCtT	SP0498	SPD_0444
TAAAAACGCTTCCT	SP0500	SPD_0446
ATaAAAaCGgTTaCAg	SP0576	SPD_0501
gaGAAAGgGtTTaCAT	SP0605	SPD_0526
AgGcAAaCGCTTgCAT	SP0636	SPD_0554
tTGAcAaCGgTTTCAT	SP0645	SPD_0559
TGATATCGATTTCAT	SP0667	SPD_0579
cTGtAAGCatTTTCAa	SP0668	SPD_0580
AGAAAGCGGTTTCA	spr0600	SPD_0595
TGATAACTCTTTCA	SP0690	SPD_0600
ATGTAATCGATTACAA	SP0691	SPD_0601
TGACAACGCTTTCT	SP0703	SPD_0610
AaGcAAaCGCTTaCtT	SP0715	SPD_0620
TGATAGCGTTTTCC	SP0749	SPD_0652
ATGtAAGCGtTTgata	SP0754	SPD_0657
ACGAAAACGTTTGCAC	SP0758	SPD_0661
ATaAAAGCctTTaCAa	SP0758	SPD_0661
TTAAAGCGCTTTCT	SP0811	SPD_0712
AAAAAGCGGTTTCA	SP0828	SPD_0723
ATAAAGCGGTTTCT	SP0839	SPD_0733
tTGtAAaCGaTTTaca	SP0841	SPD_0735
AGAAAGCGTTTTCG	spr0798	SPD_0791
CGAAAACGCTTTCT	SP0899	SPD_0792
AAGAAAAGGCTTACAA	SP0901	SPD_0795
ATGAAAcCGCTTcaAa	SP0953	SPD_0842
ATGAAAGCTTTTGCTA	SP1040	SPD_0921
TTATAACGTTTTGA	SP1042	SPD_0923
TTGAAAACGTTTGCGT	spr0948	SPD_0927
ATaAAtcCGCTTTCAa	SP1096	SPD_0981
TTGAAAGCGGATTTAT	SP1097	SPD_0982
taGAAAaCGCTTaCAg	SP1121	SPD_1005
AaGtAAtCGCTTTCtT	SP1127	SPD_1010
TTAAACTGCTTTCA	SP1126	SPD_1011
AaGAAAGCGaTTaCtT	SP1128	SPD_1012
ATGtAAagGtTTaCAa	SP1187	SPD_1049
TTAAAATGTTTTCA	SP1194	SPD_1054
CAGAAAACGCTTCCTA	SP1215	SPD_1075
ActAAAaCGtTTaCAT	SP1220	SPD_1078
ATGTAAACGTTTTAGT	SP1219	SPD_1077
TTCAATCGCTTTCT	SP1275	SPD_1131
AGAAAGCGCTTTAA	spr1179	SPD_1156
TTAAAACTTTTTCA	spr1193	SPD_1169
TTAAAATGTTTTCA	SP1685	SPD_1172
ATGtAAaCGtTTaCtT	SP1331	?
TTAAATCGTTTTCA	SP1415	SPD_1246
TTAAATCGTTTTCA	SP1416	SPD_1247
ATAAAACTCTTTCA	SP1435	SPD_1264
AAGAAAAGGCTTGCAT	spr1309	SPD_1284
ATTGAAGCCCTTACAT	no match	SPD_1299
ATGtAAGgGCTTcaAT	SP1470	SPD_1300
ATaAAAaCGCTTaCAa	SP1491	SPD_1320
TTAAAGTGCTTACA	SP1505	SPD_1332
TTAAAGTGCTTACA	SP1506	SPD_1333
tattAAaCGCTTcCAa	SP1514	SPD_1341
TTAATTCGCTTTCT	SP1538	SPD_1367
TTAAATCGCATTCT	SP1550	SPD_1382
tatAAAGCGtTTTCAT	SP1580	SPD_1409
ATGAtAGCGaTTaaAT	SP1584	SPD_1412
TGAAAACGCTTTCT	SP1587	SPD_1414
AGAAAGCGTTTTCA	SP1588	SPD_1415
ATGAAATCTCTTTCTA	SP1600	SPD_1425
tTGAAAGCGaTaTaAT	SP1621	?
TTATAACGCTTTTT	SP1653	SPD_1466
ATGAAAtCGCaTaCAa	SP1683	SPD_1495
tTGAAAGCGtTTTaAT	SP1685	SPD_1497
ATaAAAtCGCTTTCAa	SP1722	SPD_1532
tTGAAAGCGaTTTtAT	SP1724	SPD_1534
TTAAAATGATTTCA	SP1728	SPD_1538
caGAAAGCGCTaTCAa	SP1798	?
TAACAGCGCTTTCA	spr1620	SPD_1585
ATGAAACCGTTTCCTT	SP1827	SPD_1610
TTAAATCGATTTCT	SP1833	SPD_1617
GTGTAATCGTTTTCTT	SP1853	SPD_1634
AaGAAAaCGaTTaCAc	SP1854	SPD_1635
TCAAATCGCTTTCT	SP1863	SPD_1645
tTGgtAtCGtTTaCAa	SP1884	SPD_1664
TGGAAAACGTTTCCTT	SP1893	SPD_1672
tTGtAAaCGaTacCAa	SP1885	SPD_1665
tgGAAAGCGaTTTCAg	SP1898	SPD_1678
cTGAAAtCGCTTTCca	SP1899	SPD_1679
TTAAAATGTTTTCA	SP1926	SPD_1729
AAGAAAGGGGTTTCAT	SP1946	SPD_1745
AAGAAAGGGGTTTCAT	SP1947	SPD_1746
tatAAAaCGtTTTCAa	SP1976	SPD_1774
tTGAAAGtGtTTaCAa	SP1999	SPD_1779
ATGAAActGtTTaCAa	SP2026	SPD_1834
tTGAAAaCGCTTaaAa	SP2044	SPD_1853
ATGAAAGCctaTaCtT	SP2055	SPD_1865
tTaAAAaCGCTTgCAa	SP2107	SPD_1933
AGGAAAACGTTTGCGT	SP2108	SPD_1934
tTGcAAcCGtTTTCta	SP2108	SPD_1934
TTAATCCGCTTTCT	SP2126	SPD_1956
ATGAtAtCaCTTTaAT	SP2131	SPD_1961
tTtAAAaCGtTaaaAT	SP2143	SPD_1971
TGTAAGCGGTACCC	SP2148
taGAAAGCGtTTTCtT	SP2152	SPD_1978
TAAAAACGAATACAA	SP2157	SPD_1985
TTAAAACGaTTACTT	SP2164	SPD_1992
AaGtAAGCGtTcaCAT	SP2167	SPD_1995
ATGtgAaCGCTTaCtT	SP2168	SPD_1996
AaGAAAGCGCTTTatT	SP2186	SPD_2013
ATGAAAGCGtTaTaAT	SP2206	SPD_2033
ATGtAAGCGaTTTtta	SP2225	SPD_2052
TAAAAATCGCTTACAT	SP2226	SPD_2053
