# Supplementary material for: CcpA Ensures Optimal Metabolic Fitness of Streptococcus pneumoniae
Source: PLoS One. 2011 Oct 21;6(10):e26707. doi: 10.1371/journal.pone.0026707 (PMC3198803; doi:10.1371/journal.pone.0026707)
Supplement: Table S6 — List of genes with putative cre sites that were not significantly affected in the DNA microarray analyses of D39Δ ccpA compared to D39 wild-type. (XLS) [file pone.0026707.s007.xls]

## Sheet: Table S6
Table S6. List of genes with putative cre sites that were not affected by ccpA deletion.
cre sites predicted in this study						cre sites by van Opijnen et al. 2010 (Ref. 30)
Locus tag (TIGR4, D39 or R6)	Sequence cre	D39 locus tag	Common name			TIGR4 locus tag	cre	Common name
SPD_1299	ATTGAAGCCCTTACAT	SPD_1299	bacteriocin, putative			SP0006	(+115/+3001)	transcription-repair coupling factor
SPD_0106	TGAAAGCGCTATCCA	SPD_0106				SP0009	(+81)	hypothetical protein
SPD_0117	TGAAAGCGCTATCCA	SPD_0117	hypothetical protein SPD_1299			SP0011	(+83)	tRNA(Ile)-lysidine synthetase
SP0114	TGGATAGCGCTTTCA	SPD_0105	hypothetical protein			SP0033	(-33)	conserved hypothetical protein
SP0122	TTGCAAACGCTTACCA	SPD_0131	conserved hypothetical protein			SP0034	(+878)	membrane protein
SP0153	TTCAAGCGTTTTCA	SPD_0155	hypothetical protein			SP0045	(+3237)	putative phosphoribosylformylglycinamidine synthase
SP0238	ATGAAAGCcaTTatAa	SPD_0220	ACT domain protein			SP0052	(-104)	hypothetical protein
SP0243	TAAAAACGCTTACA	SPD_0227	iron ABC transporter, iron-binding protein			SP0058	(+717)	transcriptional regulator, GntR family
SP0305	tTGgAAaCGCTTTatT	SPD_0279	PTS system, IIB component			SP0063	(+107)	PTS system, IID component
SP0314	taGAAAcCGtTTaCAa	SPD_0287	hyaluronidase			SP0071	(+3289/+5176)	zinc metalloprotease ZmpC
SP0320	ATattAGCGCTTTCAT	SPD_0292	oxidoreductase, short chain dehydrogenase/reductase family			SP0092	(+611)	ABC transporter, substrate-binding protein
SP0321	ATGAAAGCGCTaatAT	SPD_0293	PTS system, IIA component			SP0108	(-185)	hypothetical protein
SP0346	AGAAAACGATTTGA	SPD_0315	capsular polysaccharide biosynthesis protein Cps4A			SP0114	(-179)	hypothetical protein
SP0368	ATGTAAACGCTTGCTC	SPD_0335	cell wall surface anchor family protein, authentic frameshift			SP0116	(+240)	hypothetical protein
SP0400	taGAAAatGtTaTaAT	SPD_0365	trigger factor			SP0118	(+410)	tRNA (5-methylaminomethyl-2-thiouridylate)-methyltransferase
SP0410	TTTAAGCGCTTTTA	SPD_0374	exfoliative toxin, putative			SP0120	(+1633)	glucose-inhibited division protein A
SP0413	TTAAAACTTTTTCT	SPD_0377	aspartate kinase			SP0122	(-173)	conserved hypothetical protein
SP0473	caGAAAGCGtTgTCAa	SPD_0423	ROK family protein			SP0130	(+427)	IS1167, transposase, degenerate
SP0474	tTGAcAaCGCTTTCtg	SPD_0424	PTS system, cellobiose-specific IIC component			SP0136	(+643)	glycosyl transferase, family 2
SP0496	tatAAAGCGCTTTCtT	SPD_0443	Na/Pi cotransporter II-related protein			SP0143	(+479)	conserved domain protein
SP0498	tatAAAGCGCTTTCtT	SPD_0444	endo-beta-N-acetylglucosaminidase, putative			SP0148	(+714)	ABC transporter, substrate-binding protein
SP0576	ATaAAAaCGgTTaCAg	SPD_0501	transcription antiterminator Lict			SP0150	(+501)	peptidase, M20/M25/M40 family
SP0636	AgGcAAaCGCTTgCAT	SPD_0554	ABC transporter, ATP-binding protein			SP0178	(+1020)	riboflavin biosynthesis protein RibD
SP0667	TGATATCGATTTCAT	SPD_0579	pneumococcal surface protein, putative			SP0202	(+388)	anaerobic ribonucleoside-triphosphate reductase
SP0690	TGATAACTCTTTCA	SPD_0600	cell division protein DivIB			SP0209	(+152)	ribosomal protein L3
SP0691	ATGTAATCGATTACAA	SPD_0601	hypothetical protein			SP0214	(+103)	ribosomal protein L22
SP0703	TGACAACGCTTTCT	SPD_0610	hypothetical protein			SP0225	(+43)	ribosomal protein L6
SP0749	TGATAGCGTTTTCC	SPD_0652	branched-chain amino acid ABC transporter, amino acid-binding protein			SP0240	(-66)	phosphoglycerate mutase family protein
SP0811	TTAAAGCGCTTTCT	SPD_0712	transposase family protein			SP0243	(-42)	iron ABC transporter, iron-binding protein
SP0828	AAAAAGCGGTTTCA	SPD_0723	ribose 5-phosphate isomerase			SP0250	(+1124)	PTS system, IIC component
SP0841	tTGtAAaCGaTTTaca	SPD_0735	conserved hypothetical protein			SP0251	(+2250)	putative formate acetyltransferase
SP0899	CGAAAACGCTTTCT	SPD_0792	conserved hypothetical protein			SP0256	(+358)	acetyltransferase, GNAT family
SP0901	AAGAAAAGGCTTACAA	SPD_0795	hypothetical protein			SP0262	(+94)	phosphatidate cytidylyltransferase
SP0953	ATGAAAcCGCTTcaAa	SPD_0842	acetyltransferase, GNAT family			SP0264	(+1831)	prolyl-tRNA synthetase
SP1040	ATGAAAGCTTTTGCTA	SPD_0921	site-specific recombinase, resolvase family			SP0265	(+1305)	glycosyl hydrolase, family 1
SP1042	TTATAACGTTTTGA	SPD_0923	hypothetical protein			SP0273	(-357)	translation elongation factor G
SP1096	ATaAAtcCGCTTTCAa	SPD_0981	conserved hypothetical protein			SP0289	(-64)	dihydropteroate synthase
SP1128	AaGAAAGCGaTTaCtT	SPD_1012	enolase			SP0307	(+277)	PTS system, IIA component
SP1187	ATGtAAagGtTTaCAa	SPD_1049	transcription antiterminator LacT			SP0314	(+0)	hyaluronidase
SP1194	TTAAAATGTTTTCA	SPD_1054	lacX protein, truncation			SP0321	(-107)	PTS system, IIA component
SP1219	ATGTAAACGTTTTAGT	SPD_1077	DNA gyrase subunit A			SP0366	(+1792)	oligopeptide ABC transporter, oligopeptide-binding protein AliA
SP1275	TTCAATCGCTTTCT	SPD_1131	carbamoyl-phosphate synthase, large subunit			SP0369	(+1113)	penicillin-binding protein 1A
SP1331	ATGtAAaCGtTTaCtT		phosphosugar-binding transcriptional regulator, putative			SP0371	(+200)	conserved hypothetical protein
SP1435	ATAAAACTCTTTCA	SPD_1264	ABC transporter, ATP-binding protein			SP0375	(+1122)	6-phosphogluconate dehydrogenase, decarboxylating
SP1505	TTAAAGTGCTTACA	SPD_1332	membrane protein			SP0395	(+148/+869)	putative transcriptional regulator
SP1506	TTAAAGTGCTTACA	SPD_1333	conserved hypothetical protein			SP0397	(+845)	mannitol-1-phosphate 5-dehydrogenase
SP1550	TTAAATCGCATTCT	SPD_1382	glutathione S-transferase family protein			SP0408	(+298)	sodium:alanine symporter family protein
SP1584	ATGAtAGCGaTTaaAT	SPD_1412	transcriptional regulator, putative			SP0425	(+733)	acetyl-CoA carboxylase, biotin carboxylase
SP1587	TGAAAACGCTTTCT	SPD_1414	oxalate:formate antiporter			SP0444	(+28)	hypothetical protein
SP1600	ATGAAATCTCTTTCTA	SPD_1425	hypothetical protein			SP0462	(+523/+610)	cell wall surface anchor family protein
SP1621	tTGAAAGCGaTaTaAT		transcription antiterminator BglG family protein, authentic frameshift			SP0463	(+572)	cell wall surface anchor family protein
SP1653	TTATAACGCTTTTT	SPD_1466	ABC transporter, ATP-binding protein			SP0474	(+1018)	PTS system, cellobiose-specific IIC component
SP1722	ATaAAAtCGCTTTCAa	SPD_1532	PTS system IIABC components			SP0478	(+268)	PTS system, lactose-specific IIBC components
SP1724	tTGAAAGCGaTTTtAT	SPD_1534	sucrose-6-phosphate hydrolase			SP0494	(+561)	CTP synthase
SP1728	TTAAAATGATTTCA	SPD_1538	hypothetical protein			SP0498	(+649)	putative endo-beta-N-acetylglucosaminidase
SP1798	caGAAAGCGCTaTCAa		ABC transporter, permease protein			SP0523	(+509)	putative ABC transporter, permease protein
SP1833	TTAAATCGATTTCT	SPD_1617	cell wall surface anchor family protein			SP0553	(+934)	N utilization substance protein A
SP1854	AaGAAAaCGaTTaCAc	SPD_1635	galactose operon repressor			SP0564	(+290)	hypothetical protein
SP1863	TCAAATCGCTTTCT	SPD_1645	transcriptional regulator, MarR family			SP0576	(-169)	transcription antiterminator Lict
SP1884	tTGgtAtCGtTTaCAa	SPD_1664	PTS system, IIABC components			SP0580	(+167)	acetyltransferase, GNAT family
SP1885	tTGtAAaCGaTacCAa	SPD_1665	trehalose operon transcriptional repressor			SP0599	(+277)	transmembrane protein Vexp1
SP1893	TGGAAAACGTTTCCTT	SPD_1672	hypothetical protein			SP0621	(+37)	hypothetical protein
SP1898	tgGAAAGCGaTTTCAg	SPD_1678	alpha-galactosidase			SP0636	(+139)	ABC transporter, ATP-binding protein
SP1926	TTAAAATGTTTTCA	SPD_1729	hypothetical protein			SP0637	(+776)	membrane protein
SP1946	AAGAAAGGGGTTTCAT	SPD_1745	transcriptional regulator PlcR, putative			SP0641	(+2653/+3295)	serine protease, subtilase family
SP2126	TTAATCCGCTTTCT	SPD_1956	dihydroxy-acid dehydratase			SP0655	(+876)	transporter, monovalent cation:proton antiporter-2 (CPA2) family
SP2131	ATGAtAtCaCTTTaAT	SPD_1961	transcriptional regulator, BglG family			SP0661	(+157)	DNA-binding response regulator
SP2143	tTtAAAaCGtTaaaAT	SPD_1971	conserved hypothetical protein			SP0664	(+3880)	zinc metalloprotease ZmpB
SP2168	ATGtgAaCGCTTaCtT	SPD_1996	fucose operon repressor, putative			SP0667	(-33)	putative pneumococcal surface protein
SP2226	TAAAAATCGCTTACAT	SPD_2053	conserved hypothetical protein			SP0681	(+1294/+1394)	elongation factor Tu family protein
spr0317	TTAAAGCGCCTTCT	SPD_0325	Cps2J			SP0683	(-76/+2)	hypothetical protein
spr0600	AGAAAGCGGTTTCA	SPD_0595	lactococcin 972, putative			SP0689	(+1008)	UDP-N-acetylglucosamine--N-acetylmuramyl-(pentapeptide) pyrophosphoryl-undecaprenol N-acetylglucosamine transferase
spr0798	AGAAAGCGTTTTCG	SPD_0791	bacteriophage L54a, repressor protein, putative			SP0690	(+45)	cell division protein DivIB
spr0948	TTGAAAACGTTTGCGT	SPD_0927	glycosyl hydrolase, family 13			SP0691	(-23)	hypothetical protein
spr1179	AGAAAGCGCTTTAA	SPD_1156	conserved hypothetical protein			SP0697	(-54)	ABC transporter, ATP-binding protein, authentic point mutation
spr1193	TTAAAACTTTTTCA	SPD_1169	peptide ABC transporter, permease protein			SP0698	(+27)	hypothetical protein
spr1309	AAGAAAAGGCTTGCAT	SPD_1284				SP0716	(-334)	putative transcriptional regulator
spr1620	TAACAGCGCTTTCA	SPD_1585	AGR_pAT_379p, putative			SP0717	(+754)	hydroxyethylthiazole kinase
						SP0730	(-34)	pyruvate oxidase
						SP0737	(-10)	sodium-dependent transporter
						SP0749	(-87)	branched-chain amino acid ABC transporter, amino acid-binding protein
						SP0751	(+746)	branched-chain amino acid ABC transporter, permease protein
						SP0769	(+443)	VanZF-related protein
						SP0776	(+1)	KH domain protein
						SP0780	(+255)	ribonucleoside-diphosphate reductase, alpha subunit, truncation
						SP0784	(+1133)	glutathione reductase
						SP0799	(+754)	sensor histidine kinase CiaH
						SP0802	(+1205)	DNA polymerase III, epsilon subunit/ATP-dependent helicase DinG
						SP0823	(+358)	amino acid ABC transporter, permease protein
						SP0828	(-148)	ribose 5-phosphate isomerase
						SP0829	(+8)	phosphopentomutase
						SP0842	(+1159)	pyrimidine-nucleoside phosphorylase
						SP0851	(+37)	conserved hypothetical protein
						SP0878	(+1242)	SpoE family protein
						SP0886	(+904)	putative type I restriction-modification system, M subunit
						SP0895	(+3097)	DNA polymerase III, alpha subunit
						SP0899	(-233)	conserved hypothetical protein
						SP0918	(+170)	spermidine synthase
						SP0952	(+236)	alanine dehydrogenase, authentic frameshift
						SP0953	(-72)	acetyltransferase, GNAT family
						SP0956	(-92)	hypothetical protein
						SP0957	(+412)	ABC transporter, ATP-binding protein
						SP0958	(+881)	hypothetical protein
						SP0966	(+1076)	adherence and virulence protein A
						SP0974	(+43)	putative preprotein translocase, SecG subunit
						SP0977	(+806)	tellurite resistance protein TehB
						SP0999	(+0)	cytochrome c-type biogenesis protein CcdA
						SP1003	(+689)	conserved hypothetical protein
						SP1008	(+14)	peptidase t
						SP1021	(+706)	HemK protein
						SP1044	(+548)	putative hydrolase
						SP1046	(-33)	alpha amylase family protein, authentic point mutation
						SP1096	(-21)	conserved hypothetical protein
						SP1118	(+914/+957/+1420)	putative pullulanase
						SP1120	(+1)	hypothetical protein
						SP1125	(+203)	phosphoserine phosphatase SerB, degenerate
						SP1128	(+202)	enolase
						SP1129	(+1138)	integrase/recombinase, phage integrase family
						SP1156	(+382)	ribonuclease HII
						SP1158	(+217)	hypothetical protein
						SP1163	(+0)	putative acetoin dehydrogenase, E1 component, beta subunit
						SP1174	(+686)	conserved domain protein
						SP1177	(-42)	phosphocarrier protein HPr
						SP1185	(+1042/+1889)	PTS system, lactose-specific IIBC components
						SP1187	(-165)	transcription antiterminator LacT
						SP1189	(-263)	hypothetical protein
						SP1229	(+388)	formate--tetrahydrofolate ligase
						SP1241	(+916)	amino acid ABC transporter, amino acid-binding protein/permease protein
						SP1243	(+590)	glucose-6-phosphate 1-dehydrogenase
						SP1258	(+895)	putative 2-isopropylmalate synthase
						SP1260	(-47)	copper homeostasis protein CutC
						SP1263	(+1928)	DNA topoisomerase I
						SP1275	(+195)	carbamoyl-phosphate synthase, large subunit
						SP1283	(+894)	heat shock protein HtpX
						SP1285	(+0)	glucose-inhibited division protein B
						SP1298	(+886)	DHH subfamily 1 protein
						SP1323	(+43)	hypothetical protein
						SP1325	(+557)	oxidoreductase, Gfo/Idh/MocA family
						SP1326	(+1262)	putative neuraminidase
						SP1328	(+1506)	sodium:solute symporter family protein
						SP1331	(-17)	putative phosphosugar-binding transcriptional regulator
						SP1336	(+1194)	type II DNA modification methyltransferase Spn5252IP
						SP1369	(+698)	prephenate dehydratase
						SP1380	(+277)	hypothetical protein
						SP1390	(+193)	UDP-N-acetylenolpyruvoylglucosamine reductase
						SP1396	(+535)	putative phosphate ABC transporter, ATP-binding protein
						SP1397	(+580)	putative phosphate ABC transporter, ATP-binding protein
						SP1428	(+111)	conserved hypothetical protein
						SP1469	(-50/+215)	NADH oxidase
						SP1518	(+361)	conserved hypothetical protein
						SP1523	(+805)	Snf2 family protein
						SP1551	(+938)	cation-transporting ATPase, E1-E2 family
						SP1553	(+256)	ABC transporter, ATP-binding protein
						SP1559	(+316)	phosphoglucomutase/phosphomannomutase family protein
						SP1563	(+673)	pyridine nucleotide-disulphide oxidoreductase family protein
						SP1566	(+251)	conserved hypothetical protein
						SP1584	(-12)	GTP-sensing transcriptional pleiotropic repressor CodY
						SP1590	(+544)	conserved hypothetical protein
						SP1621	(-23)	putative transcription antiterminator BglG family protein
						SP1625	(-601)	putative cadmium resistance transporter
						SP1640	(-101)	hypothetical protein
						SP1647	(-2)	endopeptidase O
						SP1650	(+430)	manganese ABC transporter, manganese-binding adhesion liprotein
						SP1653	(+26)	ABC transporter, ATP-binding protein
						SP1667	(+538)	cell division protein FtsA
						SP1689	(+534)	ABC transporter, permease protein
						SP1695	(-17)	putative acetyl xylan esterase
						SP1722	(-36)	PTS system IIABC components
						SP1736	(+2062)	primosomal protein N
						SP1739	(+1240)	KH domain protein
						SP1753	(+396)	sodium/dicarboxylate symporter family protein, authentic frameshift
						SP1761	(+755)	hypothetical protein
						SP1766	(+35)	glycosyl transferase, family 8
						SP1767	(+2401)	glycosyl transferase, family 8
						SP1774	(+11)	putative transcriptional regulator
						SP1797	(+479/+595)	ABC transporter, permease protein
						SP1812	(+1182)	tryptophan synthase, beta subunit
						SP1832	(+244)	hypothetical protein
						SP1849	(+0)	DpnD protein
						SP1855	(+1024)	alcohol dehydrogenase, zinc-containing
						SP1857	(+306)	cation efflux system protein
						SP1860	(+103)	choline transporter
						SP1884	(-47)	trehalose PTS system, IIABC components
						SP1890	(+970)	oligopeptide ABC transporter, permease protein AmiC
						SP1896	(+553)	sugar ABC transporter, permease protein
						SP1898	(-40/+1391)	alpha-galactosidase
						SP1914	(+0)	hypothetical protein
						SP1926	(+193)	hypothetical protein
						SP1931	(+418)	hypothetical protein
						SP1937	(+166)	autolysin
						SP1949	(+13)	hypothetical protein
						SP1956	(+463)	hypothetical protein
						SP1957	(-291)	ABC transporter, ATP-binding protein
						SP1963	(+775)	CBS domain protein
						SP1974	(+77)	acylphosphatase
						SP2013	(+589)	conserved hypothetical protein
						SP2021	(+111)	glycosyl hydrolase, family 1
						SP2031	(+164)	conserved hypothetical protein
						SP2053	(+151)	competence protein CglA
						SP2056	(+1101)	N-acetylglucosamine-6-phosphate deacetylase
						SP2064	(+576)	hydrolase, haloacid dehalogenase-like family
						SP2067	(+1097)	hypothetical protein
						SP2095	(+0)	5-formyltetrahydrofolate cyclo-ligase family protein
						SP2101	(+1879)	cation-transporting ATPase, EI-E2 family
						SP2113	(+240)	conserved hypothetical protein
						SP2127	(+675)	transketolase, C-terminal subunit
						SP2169	(+247)	zinc ABC transporter, zinc-binding lipoprotein
						SP2175	(+849/+949)	dltB protein
						SP2193	(-86)	DNA-binding response regulator
						SP2210	(-124)	cysteine synthase
						SP2218	(+430)	rod shape-determining protein MreC
						SP2231	(+982)	putative ABC transporter, permease protein
						SP2236	(+1101)	putative sensor histidine kinase ComD
