# Supplementary material for: CcpA Ensures Optimal Metabolic Fitness of Streptococcus pneumoniae
Source: PLoS One. 2011 Oct 21;6(10):e26707. doi: 10.1371/journal.pone.0026707 (PMC3198803; doi:10.1371/journal.pone.0026707)
Supplement: Table S7 — Subtable abstracted from Table S1, giving the virulence genes regulated by CcpA. Gene names and references are given as well. (XLS) [file pone.0026707.s008.xls]

## Sheet: Table S7
Table S7. Virulence genes regulated by CcpA.
Virulence genes survey THIS STUDY Yellow = possible direct effect	Virulence genes as reported by Hava and Camilli, 2002 (Ref. 21) Yellow = possible direct effect	Gene name	Reference virulence gene(a)	Locus tag in spot description DNA microarrays	TIGR4 locus tag	R6 locus tag	D39 locus tag	Ratio Glc_M ccpA/wt	Bayes.p	FDR	Ratio Gal_M ccpA/wt	Bayes.p	FDR	Ratio Glc_TS ccpA/wt	Bayes.p	FDR	Ratio Gal_TS ccpA/wt	Bayes.p	FDR	Ratio wt_M Glc/Gal	Bayes.p	FDR	Ratio ccpA_M Glc/Gal	Bayes.p	FDR	Ratio wt_TS Glc/Gal	Bayes.p	FDR	Ratio ccpA_TS Glc/Gal	Bayes.p	FDR	D39 annotation downloaded from NCBI	COG	Locus tag on array	Locus tag on array	Sequence cre site	Position to start space between middle CcpA box and start codon	Position to promoter where T of TATAAT is 1; always shortest distance is taken to the middle of CcpA box	Remark
SP0057		strH	Dalia et al. 2010 (Ref. 23)	SP0057	SP0057	spr0057	SPD_0063							0.368589	1.26676e-12	3.80357e-11				2.12	0.000100092	0.00106287				4.26	1.15e-05	0.000146169				beta-N-acetylhexosaminidase	[G] Carbohydrate transport and metabolism	SP0057	SP0057	ATATAATCGCTATCAA	-36	27
SP0060		bga	Terra et al. 2009	SP0060	SP0060	spr0059	SPD_0065	15.2223	0	0	22.0233	0	0	8.77857	3.44169e-15	2.85415e-13	19.2448	8.57334e-05	0.0023148				0.62	3.29e-05	0.000603467				0.46	0.000922094	0.0197034	Beta-galactosidase 3	[G] Carbohydrate transport and metabolism	SP0060	SP0060	ATGAAAGCGCAAACTT	-29	27
	SP0063		Hava, Camilli 2002 (Ref. 21)	SP0063	SP0063	spr0062	SPD_0068	12.1148	1.57652e-14	6.05908e-13	22.4439	0	0	11.9936	4.97491e-13	1.75026e-11	8.67921	8.4433e-08	2.26215e-05													PTS system, IID component	[G] Carbohydrate transport and metabolism	SP0063	SP0063
SP0082		pavB	Jensch et al. 2010	SP0082	SP0082	spr0075	SPD_0080										0.190185	0.000282635	0.00523626													cell wall surface anchor family protein		SP0082	SP0082
	SP0095		Hava, Camilli 2002 (Ref. 21)	SP0095	SP0095	spr0084	SPD_0091										0.385261	0.00152274	0.0200139													hypothetical protein SPD_0091	[R] General function prediction only	SP0095	SP0095
	SP0100		Hava, Camilli 2002 (Ref. 21)	SP0100	SP0100	spr0089	SPD_0096				2.79251	7.69496e-13	1.94284e-11				2.42598	0.00222652	0.0258499	3.06	3.58898e-08	2.40392e-06				2.43	0.000220833	0.00160242				hypothetical protein SPD_0096	[K] Transcription	SP0100	SP0100
	SP0102		Hava, Camilli 2002 (Ref. 21)	SP0102	SP0102	spr0091	SPD_0098							0.409519	7.51532e-12	1.58642e-10				1.71	6.68533e-06	0.000133822				3.49	2.03e-07	7.3e-06				glycosyl transferase, group 2 family protein	[M] Cell wall/membrane/envelope biogenesis	SP0102	SP0102	ATTGTTACCGATCACATTC	downstream of start
	SP0110		Hava, Camilli 2002 (Ref. 21)	SP0110	SP0110	spr0099	SPD_0107	3.07916	8.09131e-13	1.87838e-11	3.9644	9.67448e-13	2.37334e-11	1.75148	2.54414e-07	1.0689e-06	4.40694	3.918e-05	0.00125196													membrnae protein, putative	[S] Function unknown	SP0110	SP0110
SP0117	SP0117	pspA	Bergmann, Hammerschmidt 2006 (Ref. 42)	SP0117	SP0117	spr0121	SPD_0126	2.77869	5.75251e-12	1.08141e-10																						pneumococcal surface protein A	[R] General function prediction only	SP0117	SP0117
	SP0141		Hava, Camilli 2002 (Ref. 21)	SP0141	SP0141	spr0140	SPD_0144	0.54805	4.60701e-08	2.84058e-07				0.366093	5.32974e-12	1.22937e-10																transcriptional regulator		SP0141	SP0141
SP0155		tcs07	Throup et al. 2000	SP0155	SP0155	no_R6	SPD_0157	3.33069	1.68754e-14	6.4145e-13	2.96749	2.1076e-09	2.24314e-08	4.68707	1.66534e-15	1.65725e-13	2.11803	0.0162954	0.108938										2.99	0.00137577	0.0240795	sensor histidine kinase, putative	[T] Signal transduction mechanisms	SP0155	SP0155
SP0156		tcs07	Throup et al. 2000	SP0156	SP0156	spr0154	SPD_0158	3.79046	1.55431e-14	6.04086e-13	2.81926	3.68577e-07	1.99204e-06	4.54424	5.40679e-14	2.61553e-12	2.90901	0.00114323	0.0163863										2.68	5.49e-05	0.00415919	DNA-binding response regulator	[T] Signal transduction mechanisms	SP0156	SP0156
	SP0157		Hava, Camilli 2002 (Ref. 21)	SP0157	SP0157	spr0155	SPD_0159	2.18198	5.7154e-09	4.65166e-08	2.33608	1.41525e-09	1.55407e-08	2.03991	4.13024e-08	2.15354e-07													3.71	4.42e-05	0.0037568	hypothetical protein SPD_0159		SP0157	SP0157	CATGAAAAAGAAACCAATT	downstream of start
	SP0246		Hava, Camilli 2002 (Ref. 21)	SP0246	SP0246	spr0227	SPD_0230	0.654499	1.52961e-06	6.08851e-06				0.49772	1.45051e-10	1.89218e-09																transcriptional regulator, DeoR family protein	[G] Carbohydrate transport and metabolism	SP0246	SP0246
	SP0268		Hava, Camilli 2002 (Ref. 21)	SP0268	SP0268	spr0247	SPD_0250	15.0789	1.11022e-16	1.0106e-14	11.8518	3.20002e-09	3.18071e-08	8.17721	1.33227e-15	1.49687e-13	47.9434	0.000114035	0.00272045													pullulanase, extracellular	[G] Carbohydrate transport and metabolism	SP0268	SP0268	AAGAAAACGCTTGCAT	-61	-25
	SP0338		Hava, Camilli 2002 (Ref. 21)	SP0338	SP0338	spr0307	SPD_0308	0.473666	1.06807e-08	7.92801e-08										2.51	0.0002125	0.0018881				2.53	3.53e-06	5.77e-05				ATP-dependent Clp protease, ATP-binding subunit	[O] Posttranslational modification, protein turnover, chaperones	SP0338	SP0338
SP0340		luxS	Joyce et al. 2004	SP0340	SP0340	spr0308	SPD_0309							0.485606	3.69261e-09	2.80204e-08	0.571063	0.0666105	0.289282							4.33	7.75e-07	1.75e-05				S-ribosylhomocysteinase	[T] Signal transduction mechanisms	SP0340	SP0340
SP0409		alkylhydroperoxidase	Paterson et al. 2005	SP0409	SP0409	spr0370	SPD_0373	2.71895	3.9217e-10	4.66157e-09	4.16324	8.32667e-15	3.89216e-13				1.71706	0.0248033	0.145683													hypothetical protein SPD_0373	[S] Function unknown	SP0409	SP0409
	SP0445	ilvB	Hava, Camilli 2002 (Ref. 21)	SP0445	SP0445	spr0401	SPD_0404										2.74957	0.000148236	0.0032472	2.42	0.000295874	0.00247129										acetolactate synthase catalytic subunit	[E] Amino acid transport and metabolism	SP0445	SP0445	ATGAAATCGGTATCTT	-146	-102
	SP0454		Hava, Camilli 2002 (Ref. 21)	SP0454	SP0454	spr0410	SPD_0414							0.578954	3.3534e-08	1.79967e-07	0.481589	0.00193029	0.0235077													hypothetical protein SPD_0414	[S] Function unknown	SP0454	SP0454
SP0459		pflA	Yesilkaya et al. 2009 (Ref. 39)	SP0459	SP0459	spr0415	SPD_0420	6.57848	2.77556e-15	1.3914e-13	1.98632	2.37407e-09	2.50363e-08	3.22413	1.61492e-08	9.8507e-08	1.60626	0.000214853	0.00422786	0.39	4.4818e-07	1.77388e-05				0.54	6.35e-05	0.000575537				formate acetyltransferase	[C] Energy production and conversion	SP0459	SP0459	TGAAATCGGTTACTT	-70	-13	boxes different in D39 and TIGR4
	SP0586		Hava, Camilli 2002 (Ref. 21)	SP0586	SP0586	spr0515	SPD_0511							1.80252	9.3093e-08	4.44169e-07	3.16909	0.000135748	0.00303082										0.46	0.00182047	0.0286909	5,10-methylenetetrahydrofolate reductase	[E] Amino acid transport and metabolism	SP0586	SP0586
	SP0645		Hava, Camilli 2002 (Ref. 21)	SP0645	SP0645	spr0562	SPD_0559	4.96793	2.88658e-15	1.42638e-13	3.172	1.26565e-14	5.54164e-13	3.81748	8.22675e-14	3.72127e-12				0.36	3.98647e-06	9.4455e-05										PTS system IIA component, putative	[G] Carbohydrate transport and metabolism	SP0645	SP0645	TTGACAACGGTTTCAT	-45	-15
SP0648	SP0648	bgaA	Dalia et al. 2010 (Ref. 23); Terra et al. 2009	SP0648	SP0648	spr0565	SPD_0562	10.5182	4.88498e-15	2.1663e-13	2.64302	6.9803e-10	8.38363e-09	12.3931	1.10134e-13	4.67801e-12	2.46244	8.35254e-05	0.0022907	0.19	1.66349e-11	6.43771e-09				0.21	9.81e-08	4.38e-06	2.08	0.00156748	0.0261221	beta-galactosidase precursor, putative	[G] Carbohydrate transport and metabolism	SP0648	SP0648
	SP0686		Hava, Camilli 2002 (Ref. 21)	SP0686	SP0686	spr0601	SPD_0596	75.3438	1.11022e-16	1.09722e-14	33.4225	0	0	45.5707	3.33067e-16	5.27305e-14	56.7516	2.71084e-06	0.000196705	0.46	0.000139777	0.00134859							2.35	0.00015184	0.00669442	hypothetical protein SPD_0596	[S] Function unknown	SP0686	SP0686
	SP0726	thiD	Hava, Camilli 2002 (Ref. 21)	SP0726	SP0726	spr0638	SPD_0632	2.31832	8.86291e-13	2.03025e-11				1.83474	1.02557e-09	9.57653e-09	0.641353	0.00162573	0.0209719													phosphomethylpyrimidine kinase	[H] Coenzyme transport and metabolism	SP0726	SP0726
SP0766		sodA	Yesilkaya et al. 2000 (Ref. 20)	SP0766	SP0766	spr0674	SPD_0667	3.74017	1.4036e-11	2.37993e-10	3.02569	7.05769e-13	1.80834e-11				2.18041	0.0201725	0.127054	0.53	1.78042e-06	5.16767e-05				2.57	7.44e-06	0.000105407	4.47	0.000766838	0.0176881	superoxide dismutase, manganese-dependent	[P] Inorganic ion transport and metabolism	SP0766	SP0766	AATGTTTGCGTTATCATTT	-39	-3
SP0834		nrc	Yamaguchi et al. 2009	SP0834	SP0834	spr0737	SPD_0729	1.95095	1.07731e-10	1.52722e-09				2.12691	1.02924e-10	1.4397e-09				0.59	1.07445e-06	3.53048e-05							6.95	0.00191054	0.0290585	hemolysin-related protein		SP0834	SP0834
	SP0877		Hava, Camilli 2002 (Ref. 21)	SP0877	SP0877	spr0780	SPD_0773	2.03805	9.28058e-12	1.68071e-10	2.87325	8.71314e-12	1.72221e-10	1.82428	1.23126e-09	1.10814e-08	1.74766	7.07306e-05	0.0020193							0.23	2.38e-06	4.14e-05	0.21	6.03e-06	0.00175119	PTS system, fructose specific IIABC components	[G] Carbohydrate transport and metabolism	SP0877	SP0877
SP0908		tex	He et al. 2006	SP0908	SP0908	spr0808	SPD_0802							1.66844	9.25861e-09	6.15415e-08	0.497754	2.82208e-05	0.0009543	0.67	6.99969e-05	0.000809964				0.4	2.26e-05	0.00024581				S1 RNA-binding domain-containing protein	[K] Transcription	SP0908	SP0908
	SP0979	pepF	Hava, Camilli 2002 (Ref. 21)	SP0979	SP0979	spr0882	SPD_0866				1.50959	3.06999e-08	2.2642e-07	0.432542	8.63496e-10	8.30817e-09										6.21	8.08e-07	1.81e-05				oligoendopeptidase F	[E] Amino acid transport and metabolism	SP0979	SP0979
	SP1001		Hava, Camilli 2002 (Ref. 21)	SP1001	SP1001	spr0905	SPD_0887	0.59702	1.94661e-09	1.87557e-08	0.479563	6.10652e-10	7.49024e-09				0.458011	0.0700303	0.298916													amino acid permease family protein	[E] Amino acid transport and metabolism	SP1001	SP1001
SP1003	SP1003	phtD	Ogguniyi et al. 2009	SP1003	SP1003	spr0907	SPD_0889	0.661777	5.56418e-07	2.51588e-06	0.395519	1.92069e-13	5.87934e-12				0.355773	0.00576635	0.0534154													pneumococcal histidine triad protein D precursor		SP1003	SP1003
	SP1018	tdk	Hava, Camilli 2002 (Ref. 21)	SP1018	SP1018	spr0922	SPD_0904	0.634619	1.8878e-08	1.31651e-07				0.403945	1.2291e-09	1.11193e-08																thymidine kinase	[F] Nucleotide transport and metabolism	SP1018	SP1018
SP1119		gapdh	Bergmann et al. 2004	SP1119	SP1119	spr1028	SPD_1004	3.91095	1.03584e-13	3.06236e-12	2.0009	1.02714e-08	8.86008e-08	2.88642	7.88702e-13	2.56734e-11	4.24413	9.1387e-05	0.00237538				2.09	4.37e-07	2.53e-05							glyceraldehyde-3-phosphate dehydrogenase, NADP-dependent	[C] Energy production and conversion	SP1119	SP1119
	SP1121	glgB	Hava, Camilli 2002 (Ref. 21)	SP1121	SP1121	spr1029	SPD_1005	31.7364	0	0	21.3401	0	0	20.7899	6.66134e-16	8.59313e-14	38.4533	2.25081e-08	8.71063e-06													glycogen branching enzyme	[G] Carbohydrate transport and metabolism	SP1121	SP1121
	SP1121	glgB	Hava, Camilli 2002 (Ref. 21)	SP1121	SP1121	spr1029	SPD_1005	40.4682	0	0	21.3401	0	0																2.33	0.000892575	0.0195524	glycogen branching enzyme	[G] Carbohydrate transport and metabolism	SP1121	SP1121	TAGAAAACGCTTACAG	-22	20
	SP1127		Hava, Camilli 2002 (Ref. 21)	SP1127	SP1127	spr1035	SPD_1010	3.41789	1.8141e-13	4.90233e-12	3.11183	5.07705e-13	1.35089e-11	1.90893	3.46192e-06	1.09717e-05	3.35331	0.0243897	0.143982	0.48	0.000797843	0.00541694										hypothetical protein SPD_1010	[S] Function unknown	SP1127	SP1127	AAGTAATCGCTTTCTT	-47	-35
SP1161		dhdh	Smith et al. 2002	SP1161	SP1161	spr1048	SPD_1025	0.36085	1.09324e-12	2.43968e-11	0.595922	1.16329e-09	1.298e-08										0.55	4.94e-05	0.000810934	0.43	0.000662176	0.00381216				dihydrolipoamide dehydrogenase	[C] Energy production and conversion	SP1161	SP1161
	SP1193	lacA	Hava, Camilli 2002 (Ref. 21)	SP1193	SP1193	spr1076	SPD_1053	1.61463	6.95263e-09	5.51586e-08	0.181929	6.66134e-16	4.80033e-14				0.188886	2.06117e-07	3.4186e-05	0.09	4.22995e-14	7.36646e-11				0.09	6.51e-11	3.24e-08				galactose-6-phosphate isomerase subunit LacA	[G] Carbohydrate transport and metabolism	SP1193	SP1193
SP1241		glnP	Hendriksen et al. 2008; Härtel et al. 2011	SP1241	SP1241	spr1120	SPD_1098	0.479817	8.81295e-11	1.28084e-09							0.666237	0.00301751	0.0319453													amino acid ABC transporter, amino acid-binding protein/permease protein	[E] Amino acid transport and metabolism	SP1241	SP1241
	SP1278	pyrR	Hava, Camilli 2002 (Ref. 21)	SP1278	SP1278	spr1156	SPD_1134							0.308029	7.43876e-08	3.65949e-07	1.61587	0.00421242	0.0421605	1.71	0.000232683	0.00203117				7.38	4.18e-10	9.7e-08				pyrimidine regulatory protein PyrR	[F] Nucleotide transport and metabolism	SP1278	SP1278
	SP1286	uraA	Hava, Camilli 2002 (Ref. 21)	SP1286	SP1286	spr1165	SPD_1141							0.389206	0.000147797	0.000359733										4.96	3.72e-09	4.62e-07				uracil-xanthine permease	[F] Nucleotide transport and metabolism	SP1286	SP1286
	SP1343		Hava, Camilli 2002 (Ref. 21)	SP1343	SP1343	spr1204	SPD_1178	1.67309	5.2577e-09	4.31981e-08				1.84005	3.36582e-10	3.88184e-09	0.434136	0.000205021	0.00412767	0.51	1.43229e-07	6.92868e-06				0.3	1.52e-07	5.94e-06				prolyl oligopeptidase family protein	[E] Amino acid transport and metabolism	SP1343	SP1343
	SP1378		Hava, Camilli 2002 (Ref. 21)	SP1378	SP1378	spr1236	SPD_1212							0.449022	4.12586e-10	4.57656e-09													0.41	0.00176998	0.0286736	hypothetical protein SPD_1212	[R] General function prediction only	SP1378	SP1378
	SP1382	amy	Hava, Camilli 2002 (Ref. 21)	SP1382	SP1382	spr1239	SPD_1215	0.376009	6.86906e-12	1.28433e-10	2.06463	1.92345e-09	2.05346e-08	0.399205	2.57235e-11	4.6183e-10	6.47033	0.00020984	0.00415269	3.88	3.81747e-08	2.50873e-06	0.51	0.00024	0.00254146				0.13	0.00100295	0.0210438	cytoplasmic alpha-amylase	[G] Carbohydrate transport and metabolism	SP1382	SP1382
	SP1538		Hava, Camilli 2002 (Ref. 21)	SP1538	SP1538	spr1393	SPD_1367							0.498813	1.18707e-10	1.62778e-09																Cof family protein/peptidyl-prolyl cis-trans isomerase, cyclophilin type	[O] Posttranslational modification, protein turnover, chaperones	SP1538	SP1538	TTAATTCGCTTTCT	-244	no clear promoter
	SP1580	msmK	Hava, Camilli 2002 (Ref. 21)	SP1580	SP1580	spr1437	SPD_1409	6.12691	1.88738e-15	1.02007e-13	5.88503	4.44089e-16	3.41357e-14	4.05077	5.27356e-14	2.58701e-12	6.86122	1.3617e-08	6.77542e-06							0.43	0.000277183	0.00194251				sugar ABC transporter, ATP-binding protein	[G] Carbohydrate transport and metabolism	SP1580	SP1580	TATAAAGCGTTTTCAT	-47	-9
	SP1654		Hava, Camilli 2002 (Ref. 21)	SP1654	SP1654	spr1498	SPD_1467							0.497402	3.74928e-11	6.27824e-10																hypothetical protein SPD_1467		SP1654	SP1654
SP1687		nanB	Manco et al. 2006	SP1687	SP1687	spr1531	SPD_1499	3.22534	2.65676e-13	6.85802e-12	2.24584	1.05436e-08	9.02732e-08	1.97367	1.33405e-09	1.17336e-08																sialidase B precursor	[G] Carbohydrate transport and metabolism	SP1687	SP1687
SP1693		nanA	Manco et al. 2006; Mitchell, Mitchell 2010	SPXX17	SP1693	spr1536	SPD_1504	10.3225	6.88338e-15	2.93946e-13	6.21807	1.06581e-14	4.78786e-13	6.11404	5.55112e-16	7.43636e-14	28.0004	0.00531744	0.0504649													sialidase A precursor		SPXX17	SPXX17
SP1693		nanA	Manco et al. 2006; Mitchell, Mitchell 2010	SPXX41	SP1693	no_R6	SPD_1504	9.25654	7.54952e-15	3.18461e-13	5.74967	2.56462e-14	1.05607e-12	4.79148	8.79852e-13	2.78593e-11	3.36701	0.0235943	0.140959													sialidase A precursor		SPXX41	SPXX41
	SP1706		Hava, Camilli 2002 (Ref. 21)	SP1706	SP1706	spr1548	SPD_1516	2.28794	2.38043e-12	4.81515e-11				2.16726	7.88658e-11	1.17389e-09				0.48	7.20524e-06	0.0001402	1.51	0.000394595	0.00374489	0.21	4.46e-07	1.14e-05				hypothetical protein SPD_1516		SP1706	SP1706
	SP1715		Hava, Camilli 2002 (Ref. 21)	SP1715	SP1715	spr1559	SPD_1525							2.22522	5.00805e-09	3.67222e-08																ABC transporter, ATP-binding protein	[V] Defense mechanisms	SP1715	SP1715	TAAAAATGTTAACAA	downstream of start
	SP1717		Hava, Camilli 2002 (Ref. 21)	SP1717	SP1717	spr1562	SPD_1528	2.42004	7.07257e-12	1.31527e-10																						ABC transporter, ATP-binding protein	[R] General function prediction only	SP1717	SP1717	ATTGTAAAGGCTATCAAAA	-47	-14
	SP1779		Hava, Camilli 2002 (Ref. 21)	SP1779	SP1779	spr1605	SPD_1570										0.46927	0.00142548	0.0191697													hypothetical protein SPD_1570		SP1779	SP1779
SP1795		susH	Iyer, Camilli 2007	SP1795	SP1795	spr1617	SPD_1582	1.89783	2.64508e-08	1.76288e-07	1.89086	1.44579e-08	1.18789e-07	4.04992	8.05911e-13	2.59906e-11																sucrose-6-phosphate hydrolase, putative	[G] Carbohydrate transport and metabolism	SP1795	SP1795
	SP1815	trpD	Hava, Camilli 2002 (Ref. 21)	SP1815	SP1815	spr1635	SPD_1600	2.1676	1.15588e-08	8.47072e-08				2.20222	1.80828e-11	3.33239e-10																anthranilate phosphoribosyltransferase	[E] Amino acid transport and metabolism	SP1815	SP1815
	SP1816	trpG	Hava, Camilli 2002 (Ref. 21)	SP1816	SP1816	spr1636	SPD_1601	1.93297	1.15848e-08	8.47187e-08				2.08129	4.66661e-11	7.52491e-10	2.5159	0.0368894	0.192922													anthranilate synthase component II	[E] Amino acid transport and metabolism	SP1816	SP1816
SP1855	SP1855	adhC	Stroeher et al. 2007	SP1855	SP1855	spr1670	SPD_1636				2.22726	9.78706e-12	1.89125e-10																			alcohol dehydrogenase, zinc-containing	[E] Amino acid transport and metabolism	SP1855	SP1855
	SP1952		Hava, Camilli 2002 (Ref. 21)	SP1952	SP1952	spr1769	SPD_1751	43.0744	4.44089e-16	3.01197e-14	2.03067	9.02091e-08	5.69403e-07	19.2247	1.11022e-15	1.28897e-13				0.5	0.000742668	0.0051222	11.51	5.7e-14	1.98e-10				4.83	6.01e-05	0.00435783	hypothetical protein SPD_1751		SP1952	SP1952
	SP1956		Hava, Camilli 2002 (Ref. 21)	SP1956	SP1956	spr1772	SPD_1754	20.0733	0	0	1.84848	1.09321e-07	6.77675e-07	9.69339	1.11022e-16	2.76208e-14	4.81401	0.000117806	0.00277242	0.56	0.000821564	0.00555632	6.45	6.54e-13	2.07e-10	0.47	0.000594283	0.00350828	3	5.66e-05	0.004198	hypothetical protein SPD_1754	[S] Function unknown	SP1956	SP1956
SP1976		pflA-AE	Yesilkaya et al. 2009 (Ref. 39)	SP1976	SP1976	spr1791	SPD_1774	3.84755	8.9373e-14	2.73576e-12	2.81578	6.86118e-14	2.47217e-12	3.16288	4.21219e-13	1.56075e-11	1.86985	5.69583e-06	0.000309978													pyruvate formate-lyase activating enzyme	[O] Posttranslational modification, protein turnover, chaperones	SP1976	SP1976	TATAAAACGTTTTCAA	-21	18
SP1999		ccpA	Giammarinaro and Paton 2002 (Ref. 11); Iyer et al. 2007 (Ref. 10)	SP1999	SP1999	spr1813	SPD_1797	0.325138	3.49011e-09	3.10342e-08	0.371621	9.03918e-11	1.43424e-09	0.221798	3.9635e-14	2.0007e-12	0.149295	0.00209691	0.024591													catabolite control protein A	[K] Transcription	SP1999	SP1999	TTGAAAGTGTTTACAA	-142	-15
	SP2022	celB	Hava, Camilli 2002 (Ref. 21)	SP2022	SP2022	spr1834	SPD_1831	0.473861	7.63048e-10	8.379e-09				0.459158	5.89577e-11	9.1674e-10	2.1278	0.00073213	0.011591										0.33	0.00220071	0.0316738	PTS system, IIC component	[G] Carbohydrate transport and metabolism	SP2022	SP2022
	SP2039		Hava, Camilli 2002 (Ref. 21)	SP2039	SP2039	spr1850	SPD_1848	0.591943	4.77303e-09	4.00726e-08	1.88763	1.72305e-09	1.85094e-08	0.465671	7.36908e-11	1.12081e-09				2.9	3.64136e-06	8.80753e-05										hypothetical protein SPD_1848		SP2039	SP2039
	SP2060	pcp	Hava, Camilli 2002 (Ref. 21)	SP2060	SP2060	spr1872	SPD_1870	0.390701	8.00471e-14	2.56373e-12	2.69727	5.52891e-14	2.12494e-12	0.566028	9.57582e-10	9.0632e-09	2.80418	0.000136285	0.00300431	3.01	1.79971e-08	1.3337e-06	0.4	5.71e-08	6.21e-06	2.85	2.63e-05	0.000276301				pyrrolidone-carboxylate peptidase	[O] Posttranslational modification, protein turnover, chaperones	SP2060	SP2060
	SP2105		Hava, Camilli 2002 (Ref. 21)	SP2105	SP2105	spr1915	SPD_1931	4.43953	4.51772e-12	8.68155e-11	2.29336	5.79514e-11	9.5911e-10	2.05062	6.24279e-09	4.39265e-08																hypothetical protein SPD_1931		SP2105	SP2105	AATGTAAGCAGATACAAAT	-28	12
	SP2108	malX	Hava, Camilli 2002 (Ref. 21)	SP2108	SP2108	spr1918	SPD_1934	12.2089	5.55112e-16	3.62289e-14	13.2918	0	0	7.29331	6.81677e-14	3.20849e-12	15.1945	1.14324e-10	3.98191e-07													maltose/maltodextrin ABC transporter, maltose/maltodextrin-binding protein	[G] Carbohydrate transport and metabolism	SP2108	SP2108	AGGAAAACGTTTGCGT	-51	no clear promoter
SP2136	SP2136	pcpA	Glover et al. 2008	SP2136	SP2136	spr1945	SPD_1965	7.60728	4.59234e-07	2.13794e-06				2.64735	2.86613e-11	5.06738e-10				0.17	9.83195e-07	3.29276e-05	1.8	7.93e-05	0.0011227				2.21	0.000141267	0.00664909	choline binding protein PcpA	[R] General function prediction only	SP2136	SP2136
	SP2162		Hava, Camilli 2002 (Ref. 21)	SP2162	SP2162	spr1968	SPD_1990	2.21137	1.49262e-10	2.01678e-09	1.73223	2.45839e-08	1.88549e-07	2.3848	1.30366e-10	1.75315e-09																PTS system, IIC component	[G] Carbohydrate transport and metabolism	SP2162	SP2162
	SP2164		Hava, Camilli 2002 (Ref. 21)	SP2164	SP2164	spr1970	SPD_1992	2.23241	2.89281e-11	4.59001e-10	1.70411	1.2169e-08	1.02166e-07	2.41998	5.49028e-12	1.25807e-10	2.22708	0.00966155	0.0751143													PTS system, IIA component	[G] Carbohydrate transport and metabolism	SP2164	SP2164	TTAAAACGATTACTT			in end gene, but in front of PTS SP2163
	SP2167	fucK	Hava, Camilli 2002 (Ref. 21)	SP2167	SP2167	spr1973	SPD_1995	1.95089	2.70973e-10	3.37157e-09	1.90287	1.75679e-08	1.4034e-07	2.08735	2.56525e-10	3.08095e-09																L-fuculose kinase FucK, putative	[G] Carbohydrate transport and metabolism	SP2167	SP2167	AAGTAAGCGTTCACAT	-69	-32
	SP2182		Hava, Camilli 2002 (Ref. 21)	SP2182	SP2182	spr1986	SPD_2009	14.1794	1.11022e-16	1.03791e-14	12.2566	0	0	6.14013	4.94882e-12	1.16464e-10	8.48265	0.00867249	0.0694397													hypothetical protein SPD_2009		SP2182	SP2182	ATTGTTACCGCTTTCTTTT	-143	-24
SP2235		comE	Lau et al. 2001; Bartilson et al. 2001	SP2235	SP2235	spr2041	SPD_2063	0.368256	6.13176e-13	1.45272e-11				0.4502	1.78433e-11	3.30575e-10				3.08	1.82447e-07	8.25277e-06										response regulator	[K] Transcription	SP2235	SP2235
SP2236		comD	Lau et al. 2001; Bartilson et al. 2001	SP2236	SP2236	spr2042	SPD_2064	0.304669	6.75016e-14	2.20272e-12				0.44768	4.56888e-11	7.40158e-10				3.53	2.66038e-07	1.09013e-05										putative sensor histidine kinase ComD	[T] Signal transduction mechanisms	SP2236	SP2236
(a)Reference List Table S7 (for publications cited in manuscript the reference number is given)
Terra VS, Homer KA, Rao SG, Andrew PW, Yesilkaya H (2010) Characterization of a novel beta-galactosidase activity that contributes to glycoprotein degradation and virulence in Streptococcus pneumoniae. Infect Immun 78: 348-357.
Jensch I, Gamez G, Rothe M, Ebert S, Fulde M, et al. (2010) PavB is a surface-exposed adhesin of Streptococcus pneumoniae contributing to nasopharyngeal colonization and airways infections. Mol Microbiol 77: 22-43.
Throup JP, Koretke KK, Bryant AP, Ingraham KA, Chalker AF, et al. (2000) A genomic analysis of two-component signal transduction in Streptococcus pneumoniae. Mol Microbiol 35: 566-576.
Joyce EA, Kawale A, Censini S, Kim CC, Covacci A, et al. (2004) LuxS is required for persistent pneumococcal carriage and expression of virulence and biosynthesis genes. Infect Immun 72: 2964-2975.
Paterson GK, Blue CE, Mitchell TJ (2006) An operon in Streptococcus pneumoniae containing a putative alkylhydroperoxidase D homologue contributes to virulence and the response to oxidative stress. Microb Pathog 40: 152-160.
Yamaguchi M, Minamide Y, Terao Y, Isoda R, Ogawa T, et al. (2009) Nrc of Streptococcus pneumoniae suppresses capsule expression and enhances anti-phagocytosis. Biochem Biophys Res Commun 390: 155-160.
He X, Thornton J, Carmicle-Davis S, McDaniel LS (2006) Tex, a putative transcriptional accessory factor, is involved in pathogen fitness in Streptococcus pneumoniae. Microb Pathog 41: 199-206.
Ogunniyi AD, Grabowicz M, Mahdi LK, Cook J, Gordon DL, et al. (2009) Pneumococcal histidine triad proteins are regulated by the Zn2+-dependent repressor AdcR and inhibit complement deposition through the recruitment of complement factor H. FASEB J 23: 731-738.
Bergmann S, Rohde M, Hammerschmidt S (2004) Glyceraldehyde-3-phosphate dehydrogenase of Streptococcus pneumoniae is a surface-displayed plasminogen-binding protein. Infect Immun 72: 2416-2419.
Smith AW, Roche H, Trombe MC, Briles DE, Hakansson A (2002) Characterization of the dihydrolipoamide dehydrogenase from Streptococcus pneumoniae and its role in pneumococcal infection. Mol Microbiol 44: 431-448.
Hendriksen WT, Kloosterman TG, Bootsma HJ, Estevão S, de Groot R, et al. (2008) Site-specific contributions of glutamine-dependent regulator GlnR and GlnR-regulated genes to virulence of Streptococcus pneumoniae. Infect Immun. 2008:1230-8
Hartel T, Klein M, Koedel U, Rohde M, Petruschka L, et al. (2011) Impact of glutamine transporters on pneumococcal fitness under infection-related conditions. Infect Immun 79: 44-58.
Manco S, Hernon F, Yesilkaya H, Paton JC, Andrew PW, et al. (2006) Pneumococcal neuraminidases A and B both have essential roles during infection of the respiratory tract and sepsis. Infect Immun 74: 4014-4020.
Mitchell AM, Mitchell TJ (2010) Streptococcus pneumoniae: virulence factors and variation. Clin Microbiol Infect 16: 411-418.
Iyer R, Camilli A (2007) Sucrose metabolism contributes to in vivo fitness of Streptococcus pneumoniae. Mol Microbiol 66: 1-13.
Stroeher UH, Kidd SP, Stafford SL, Jennings MP, Paton JC, et al. (2007) A pneumococcal MerR-like regulator and S-nitrosoglutathione reductase are required for systemic virulence. J Infect Dis 196: 1820-1826.
Glover DT, Hollingshead SK, Briles DE (2008) Streptococcus pneumoniae surface protein PcpA elicits protection against lung infection and fatal sepsis. Infect Immun 76: 2767-2776.
Lau GW, Haataja S, Lonetto M, Kensit SE, Marra A, et al. (2001) A functional genomic analysis of type 3 Streptococcus pneumoniae virulence. Mol Microbiol 40: 555-571.
Bartilson M, Marra A, Christine J, Asundi JS, Schneider WP, et al. (2001) Differential fluorescence induction reveals Streptococcus pneumoniae loci regulated by competence stimulatory peptide. Mol Microbiol 39: 126-135.
